# Supplementary material for: Research on the Morphogenesis of Notopterygium incisum Rhizomes and its Mechanism: Multiomics Integration Analysis Reveals the Formation Mechanism of Silkworm-like Rings
Source: Research Square preprint supplement (doi:10.21203/rs.3.rs-8178162/v1), 2025-12-15
Supplement: Supplementary file 1 [file 6742472859ba8c289b811b7d.xlsx]

## Sheet: Table S1
Table S1 Statistical analysis of root stem diameter
Sample	2025-05-19	2025-05-31	2025-07-09	2025-08-01	2025-08-21	2025-08-29
	Rhizome diameter/mm
1	0.4509	1.061	1.5136	2.6379	4.5467	4.6696
2	0.6284	1.123	1.5882	2.5202	4.6373	7.9354
3	0.306	0.9361	1.3235	3.0054	4.6663	5.7613
4	0.5561	1.0262	1.2475	2.3468	4.5251	6.847
5	0.454	0.923	1.744	4.4781	5.4304	3.0796
6	0.5436	0.9548	1.544	4.7528	7.7125	6.9253
7	0.5892	1.1685	1.6889	4.3913	7.9747	5.5193
8	0.5258	0.9967	1.5025	5.3983	7.1465	6.9373
9	0.6687	1.0681	1.5875	4.4939	7.2023	7.8911
10	0.5183	1.0711	1.6124	3.4892	6.4434	7.3336
11	0.5674	0.9595	1.621	2.7582	5.9992	6.4936
12	0.5961	0.8337	1.593	2.5698	4.2966	7.3327
13	0.5534	1.0258	1.5698	2.6336	5.5518	6.2061
14	0.4384	1.0214	1.5518	2.8544	4.3329	7.8654
15	0.4015	1.1493	1.5143	5.9894	6.3351	7.8939
16	0.5143	1.0895	1.5294	2.6946	5.4168	7.5207
17	0.5932	0.9445	1.592	2.6484	6.1614	6.7132
18	0.5359	0.918	1.6457	2.3238	4.0402	6.1128
19	0.5415	1.0794	1.5809	4.5323	6.5866	7.359
20	0.5623	0.8558	1.6486	2.4844	6.7235	6.0988

## Sheet: Table S2
Table S2 Non-targeted metabolomics profiling
id	MS2 name	mzmed	rtmed	type	CAS	KEGG COMPOUND ID	Super.Class	Class	Sub.Class	VIP	P-VALUE	Q-VALUE	FOLD CHANGE	LOG_FOLDCHANGE
1	3-hydroxycinnamic acid	224.278	163.04	NEG		C12621	Shikimates and Phenylpropanoids	Phenylpropanoids	Cinnamic acids and derivatives	1.25314	1.09379e-08	8.27847e-08	0.897529	-0.15597
2	succinic acid	62.4157	117.019	NEG		C00042	Fatty acids	Fatty Acids and Conjugates	Dicarboxylic acids	1.24965	4.50266e-05	0.000109939	0.279108	-1.8411
3	adenosine	194.749	268.102	POS		C00212	Carbohydrates	Nucleosides	Purine nucleosides	1.27287	6.21011e-07	2.5351e-06	0.120772	-3.04964
4	hesperidin	294.567	609.181	NEG		C09755	Shikimates and Phenylpropanoids	Flavonoids	Flavanones	1.25722	7.44116e-09	6.0282e-08	0.53112	-0.91289
5	terephthalic-acid	237.869	165.019	NEG						1.08798	0.00033021	0.000666676	0.856832	-0.222916
6	l-isoleucine	62.9655	132.101	POS		C00407	Amino acids and Peptides	Small peptides	Amino fatty acids	1.27228	1.20982e-07	6.25746e-07	7.72658	2.94983
7	azelaic acid	326.361	187.097	NEG		C08261	Fatty acids	Fatty Acids and Conjugates	Dicarboxylic acids	1.24569	3.19192e-06	1.04878e-05	0.565705	-0.821878
8	4-methylumbelliferone	277.461	221.045	NEG		C03081	Shikimates and Phenylpropanoids	Coumarins	Simple coumarins	1.27259	5.7401e-09	4.83967e-08	0.416452	-1.26378
9	adenosine 3'-monophosphate	82.2115	348.069	POS		C01367	Carbohydrates	Nucleosides	Purine nucleotides	1.24991	4.25247e-08	2.57391e-07	0.597974	-0.741846
10	o-prenylumbelliferone	419.214	229.086	NEG						1.27175	3.84066e-13	2.3733e-11	2.01057	1.00761
11	2-hydroxycinnamic acid	403.293	163.04	NEG		C01772	Shikimates and Phenylpropanoids	Phenylpropanoids	Cinnamic acids and derivatives	1.27384	7.37103e-11	1.38819e-09	4.62307	2.20885
12	uridine5‘-monophosphate/ump	62.6536	323.028	NEG						1.26651	1.3951e-06	5.09984e-06	0.559532	-0.837707
13	maleic acid	59.099	115.003	NEG		C01384	Fatty acids	Fatty Acids and Conjugates	Dicarboxylic acids	1.16084	4.93878e-05	0.000119427	0.788418	-0.342968
14	eriocitrin	244.926	595.165	NEG		C09732	Shikimates and Phenylpropanoids	Flavonoids	Flavanones	1.24244	1.81742e-08	1.26892e-07	0.634115	-0.657183
15	osthenol	391.855	229.086	NEG		C18080	Shikimates and Phenylpropanoids	Coumarins	Simple coumarins	1.27229	4.08943e-08	2.48846e-07	0.527974	-0.921462
16	h-d-trp-oh	207.275	203.082	NEG						1.27339	1.65243e-17	3.76005e-14	5.3695	2.42479
17	demethylsuberosin	391.905	231.1	POS		C18083	Shikimates and Phenylpropanoids	Coumarins	Simple coumarins	1.27014	1.87263e-07	9.05485e-07	0.465308	-1.10374
18	l-proline	42.6934	114.056	NEG		C00148	Amino acids and Peptides	Small peptides	Aminoacids	1.26057	1.57292e-05	4.2876e-05	63.6133	5.99126
19	matairesinol	335.168	357.132	NEG			Shikimates and Phenylpropanoids	Lignans	Dibenzylbutyrolactone lignans	1.27263	3.90125e-14	4.78298e-12	2.06775	1.04806
20	isofraxidin	252.798	221.045	NEG			Shikimates and Phenylpropanoids	Coumarins	Simple coumarins	1.25329	4.756e-09	4.13802e-08	0.660669	-0.598
21	adenosine monophosphate	46.5354	346.054	NEG		C00020	Carbohydrates	Nucleosides	Purine nucleotides	1.19336	3.07325e-06	1.016e-05	0.745224	-0.424254
22	coniferyl aldehyde	267.112	177.055	NEG		C02666	Shikimates and Phenylpropanoids	Phenylpropanoids	Cinnamic acids and derivatives	1.10927	0.000243023	0.000504772	0.891299	-0.166019
23	alpha-d-galactose 1-phosphate	55.869	259.022	NEG		C00446	Carbohydrates	Saccharides	Monosaccharides	1.02611	0.0196276	0.0285714	0.519335	-0.945262
24	neodiosmin	298.549	607.165	NEG			Shikimates and Phenylpropanoids	Flavonoids	Flavones	1.27113	9.93506e-13	4.84028e-11	0.607098	-0.719999
25	coniferaldehyde	301.843	177.055	NEG			Shikimates and Phenylpropanoids	Phenylpropanoids	Cinnamic acids and derivatives	1.24389	7.29726e-08	4.06861e-07	1.35102	0.434045
26	l-tyrosine	50.2194	180.066	NEG		C00082	Amino acids and Peptides	Small peptides	Aminoacids	1.27205	2.14191e-07	1.01763e-06	7.76999	2.95791
27	4'-hydroxy-3'-methylacetophenone	293.286	149.06	NEG						1.12208	0.000136943	0.000300474	1.115	0.15704
28	peucenin	390.524	261.11	POS			Polyketides	Chromanes	Chromones	1.27364	6.64335e-09	5.47591e-08	0.054055	-4.20943
29	esculin	229.818	339.07	NEG		C09264	Shikimates and Phenylpropanoids	Coumarins	Simple coumarins	1.27313	2.32159e-15	7.3013e-13	0.400136	-1.32144
30	l-lysine	36.6099	147.112	POS		C00047	Amino acids and Peptides	Small peptides	Aminoacids	1.27071	2.76811e-08	1.79512e-07	37.5399	5.23035
31	pinoresinol diglucoside	250.255	681.237	NEG			Shikimates and Phenylpropanoids	Lignans	Furofuranoid lignans	1.221	8.45153e-12	2.53631e-10	0.166952	-2.5825
32	myo-inositol	40.5495	179.056	NEG		C00137	Carbohydrates	Polyols	Cyclitols	1.26218	1.57051e-09	1.66353e-08	0.595841	-0.747001
33	neochlorogenic acid	310.441	353.086	NEG		C17147	Shikimates and Phenylpropanoids	Phenylpropanoids	Cinnamic acids and derivatives	1.27338	2.77547e-16	2.0288e-13	2.86614	1.51911
34	trans-caffeic acid; plasma id-201	370.914	179.035	NEG			Shikimates and Phenylpropanoids	Phenylpropanoids	Cinnamic acids and derivatives	1.26141	1.85988e-10	2.9116e-09	1.89284	0.920551
35	xanthyletine	286.036	227.071	NEG			Shikimates and Phenylpropanoids	Coumarins	Pyranocoumarins	1.27109	2.71103e-08	1.76194e-07	0.447247	-1.16086
36	p-salicylic acid	419.252	137.024	NEG	99-96-7	C00156	Shikimates and Phenylpropanoids	Phenolic acids	Simple phenolic acids	1.22238	2.80978e-07	1.28647e-06	1.71981	0.782245
37	p-coumaric acid methyl ester geometric isomer (tentative, mse)	102.784	163.04	NEG			Shikimates and Phenylpropanoids	Phenylpropanoids	Cinnamic acids and derivatives	1.20458	1.82837e-06	6.45613e-06	0.699553	-0.515494
38	trans-cinnamate	385.264	131.048	POS		C00423	Shikimates and Phenylpropanoids	Phenylpropanoids	Cinnamic acids and derivatives	1.2714	5.10078e-13	2.93185e-11	1.60881	0.685993
39	lactose	46.0951	365.103	POS		C01970	Carbohydrates	Saccharides	Disaccharides	1.16048	3.54403e-05	8.86305e-05	0.698523	-0.51762
40	leucine	49.6311	132.101	POS		C00123	Amino acids and Peptides	Small peptides	Amino fatty acids	1.2727	1.47481e-08	1.06556e-07	5.75712	2.52535
41	o-toluic acid	359.126	135.045	NEG		C07215	Shikimates and Phenylpropanoids	Phenolic acids	Simple phenolic acids	1.1864	8.9206e-06	2.59651e-05	1.18072	0.239672
42	2-isopropylmalic acid	222.903	175.061	NEG		C02504	Fatty acids	Fatty Acids and Conjugates	Dicarboxylic acids	1.26169	1.31278e-05	3.64947e-05	2.039	1.02786
43	fraxin	220.746	371.096	POS			Shikimates and Phenylpropanoids	Coumarins	Simple coumarins	1.2729	7.53306e-10	9.12055e-09	0.314379	-1.66942
44	(-)-riboflavin	250.886	377.143	POS		C00255	Alkaloids	Anthranilic acid alkaloids		1.1849	1.35389e-05	3.74895e-05	1.17678	0.234844
45	l-histidine	38.6286	154.062	NEG		C00135	Amino acids and Peptides	Small peptides	Aminoacids	1.27355	6.50668e-08	3.69383e-07	11.6253	3.5392
46	eriodictyol 7-(6-galloylglucoside)	310.22	603.132	POS			Shikimates and Phenylpropanoids	Flavonoids	Flavanones	1.27329	8.67478e-15	1.72085e-12	2.35112	1.23335
47	s-(+)-marmesin	300.31	247.095	POS						1.23022	5.2889e-07	2.20973e-06	1.21877	0.285426
48	chrysin	364.495	299.055	NEG		C10028	Shikimates and Phenylpropanoids	Flavonoids	Flavones	1.26469	6.86338e-07	2.76184e-06	0.536875	-0.897341
49	trans-ferulic acid	257.068	193.05	NEG		C01494	Shikimates and Phenylpropanoids	Phenylpropanoids	Cinnamic acids and derivatives	1.27208	1.56564e-14	2.63591e-12	2.3021	1.20295
50	6-methoxy-7-(3-methylbut-2-enoxy)chromen-2-one	412.623	259.097	NEG			Shikimates and Phenylpropanoids	Coumarins	Simple coumarins	1.27183	8.27867e-08	4.52641e-07	0.505562	-0.98404
51	bergamottin	500.66	339.157	POS			Shikimates and Phenylpropanoids	Coumarins	Furocoumarins	1.27389	3.74318e-10	5.16765e-09	0.264356	-1.91945
52	heraclenin	348.697	287.09	POS			Shikimates and Phenylpropanoids	Coumarins	Furocoumarins	1.16507	1.29124e-06	4.76248e-06	0.265131	-1.91522
53	isoimperatorin	438.125	271.094	POS			Shikimates and Phenylpropanoids	Coumarins	Furocoumarins	1.27319	2.52698e-09	2.46349e-08	0.414018	-1.27223
54	d-phenylalanine	100.394	164.071	NEG		C02265	Amino acids and Peptides	Small peptides	Aminoacids	1.25985	1.90794e-13	1.41389e-11	8.78913	3.13572
55	1,4-dicaffeoylquinic acid	293.024	499.121	POS	30964-13-7		Shikimates and Phenylpropanoids	Phenylpropanoids	Cinnamic acids and derivatives	1.27283	1.44392e-07	7.28323e-07	11.2697	3.49438
56	2,6-dihydroxy-7-methoxy-1,1,4a-trimethyl-3,4,10,10a-tetrahydro-2h-phenanthren-9-one	473.491	303.16	NEG			Terpenoids	Diterpenoids	Podocarpane diterpenoids	1.2734	2.23479e-10	3.37688e-09	4.18767	2.06615
57	arginine	38.5754	173.104	NEG		C00062	Amino acids and Peptides	Small peptides	Aminoacids	1.27337	1.73112e-08	1.21755e-07	9.77122	3.28854
58	lapidin	447.994	335.218	POS			Terpenoids	Sesquiterpenoids	Daucane sesquiterpenoids	1.27326	2.54369e-08	1.67444e-07	0.0995959	-3.32777
59	8-hydroxybergapten	422.276	233.043	POS						1.26758	7.7768e-11	1.44908e-09	0.357811	-1.48273
60	nodakenetin	271.862	247.095	POS			Shikimates and Phenylpropanoids	Coumarins	Furocoumarins	1.27061	2.39162e-12	9.55735e-11	1.39616	0.48146
61	benzaldehyde	97.5575	107.049	POS		C00261	Shikimates and Phenylpropanoids	Phenolic acids	Simple phenolic acids	1.25806	0.000196117	0.000416171	12.3885	3.63093
62	5-hydroxymethylfurfural	44.2277	109.028	POS						1.24573	2.15202e-09	2.15832e-08	0.1548	-2.69152
63	l-methionine	47.7104	150.057	POS		C00073	Amino acids and Peptides	Small peptides	Aminoacids	1.27213	4.51577e-09	3.96647e-08	4.63744	2.21333
64	20-deoxyingenol	498.383	331.191	NEG						1.22399	1.74369e-06	6.19671e-06	1.3862	0.471139
65	3-o-feruloylquinic acid	307.865	367.103	NEG		C02572	Shikimates and Phenylpropanoids	Phenylpropanoids	Cinnamic acids and derivatives	1.15519	0.00156	0.00275613	1.52753	0.611204
66	10-undecenoic acid	45.2253	202.179	POS	112-38-9		Fatty acids	Fatty Acids and Conjugates	Unsaturated fatty acids	1.26521	8.51763e-11	1.55565e-09	1.61722	0.693514
67	2&#39;,4&#39;-dihydroxyacetophenone	359.883	151.04	NEG			Others	Others	Others	1.25153	1.03181e-09	1.17913e-08	2.17963	1.12409
68	imperatorin	438.124	293.077	POS		C09269	Shikimates and Phenylpropanoids	Coumarins	Furocoumarins	1.25898	4.06546e-09	3.6429e-08	0.422256	-1.24381
69	asparagine	42.4699	133.06	POS		C00152	Amino acids and Peptides	Small peptides	Aminoacids	1.26017	1.62874e-06	5.83102e-06	2.70077	1.43337
70	byakangelicol	387.987	299.09	POS			Shikimates and Phenylpropanoids	Coumarins	Furocoumarins	1.27003	1.67538e-13	1.29163e-11	0.519797	-0.943981
71	homoplantaginin	298.457	463.121	POS						1.14371	8.67864e-05	0.000198943	0.854827	-0.226296
72	(-)-oxypeucedanin hydrate	332.577	305.1	POS						1.26321	4.91722e-10	6.4261e-09	1.57015	0.650906
73	5-hydroxymethyl-2-furancarboxylic acid	304.476	141.016	NEG		C20448	Polyketides	Cyclic polyketides	Furans	1.24578	1.94697e-07	9.36632e-07	0.51009	-0.971177
74	guaiacin	504.267	329.172	POS			Shikimates and Phenylpropanoids	Lignans	Arylnaphthalene and aryltetralin lignans	1.26719	1.80258e-07	8.75883e-07	0.463423	-1.1096
75	3-hydroxycapric acid	415.244	187.133	NEG	14292-26-3		Fatty acids	Fatty Acids and Conjugates	Hydroxy fatty acids	1.25905	1.17909e-09	1.31405e-08	0.637131	-0.650337
76	d-proline	42.5482	116.07	POS	344-25-2	C00763	Amino acids and Peptides	Small peptides	Aminoacids	1.27238	4.71046e-07	1.99622e-06	12.0612	3.5923
77	ketovaline	97.264	115.04	NEG		C00141	Fatty acids	Fatty Acids and Conjugates	Branched fatty acids	1.25001	1.742e-05	4.69521e-05	0.39125	-1.35384
78	phlorizin	229.491	495.154	NEG		C01604	Shikimates and Phenylpropanoids	Flavonoids	Chalcones	1.2732	7.47187e-08	4.152e-07	8.09167	3.01644
79	4-vinylphenol	365.861	119.05	NEG		C05627	Shikimates and Phenylpropanoids	Phenylpropanoids	Cinnamic acids and derivatives	1.20624	9.79625e-07	3.75226e-06	0.706576	-0.501084
80	l-serine	42.7644	106.049	POS		C00065	Amino acids and Peptides	Small peptides	Amino fatty acids	1.16964	3.72811e-05	9.27662e-05	0.744635	-0.425395
81	flavone base + 3o, 1meo, o-malonylhex	324.749	549.12	POS			Shikimates and Phenylpropanoids	Flavonoids	Flavones	1.2138	1.21135e-06	4.50347e-06	1.21113	0.276354
82	(-)-perillyl alcohol	261.68	135.116	POS						1.25372	6.33806e-09	5.2624e-08	0.80705	-0.30927
83	elemicin	398.46	209.116	POS	487-11-6	C10451	Shikimates and Phenylpropanoids	Phenylpropanoids	Cinnamic acids and derivatives	1.26416	4.9007e-08	2.90624e-07	0.083965	-3.57407
84	isopimpinellin	361.472	247.059	POS		C02162	Shikimates and Phenylpropanoids	Coumarins	Furocoumarins	1.2734	3.31685e-08	2.08763e-07	0.140605	-2.83028
85	1-kestose	43.7195	522.199	POS		C03661	Carbohydrates	Saccharides	Disaccharides	1.26602	1.79344e-13	1.3471e-11	0.107559	-3.2168
86	undecanedioic acid	377.852	215.128	NEG			Fatty acids	Fatty Acids and Conjugates	Dicarboxylic acids	1.24826	1.29748e-08	9.56375e-08	0.670487	-0.576718
87	glutamine [m+2h-nh4]+; aif; ce10; ms2dec	59.6542	130.049	POS			Amino acids and Peptides	Small peptides	Aminoacids	1.23543	7.14848e-05	0.000167004	2.07674	1.05432
88	nicotiflorin	285.724	595.163	POS			Shikimates and Phenylpropanoids	Flavonoids	Flavonols	1.26637	1.90558e-08	1.31953e-07	1.57264	0.653188
89	5,7-dihydroxy-2-(4-hydroxy-3-methoxyphenyl)-2,3-dihydrochromen-4-one	353.618	301.072	NEG			Shikimates and Phenylpropanoids	Flavonoids	Flavanones	1.26841	4.71136e-12	1.62288e-10	1.68903	0.756195
90	notopterol	424.216	337.141	POS			Shikimates and Phenylpropanoids	Coumarins	Furocoumarins	1.27336	1.89935e-15	6.38893e-13	0.50072	-0.997925
91	quinic acid	41.9085	191.055	NEG		C00296	Shikimates and Phenylpropanoids	Phenolic acids	Shikimic acids and derivatives	1.18092	1.25249e-05	3.50073e-05	0.841195	-0.249487
92	alpha-santonin	438.46	263.128	NEG		C02206	Terpenoids	Sesquiterpenoids	Eudesmane sesquiterpenoids	1.22064	1.16625e-06	4.35684e-06	0.855017	-0.225976
93	apigenin-7-o-rutinoside	300.31	579.168	POS			Shikimates and Phenylpropanoids	Flavonoids	Flavones	1.27122	6.27716e-13	3.4462e-11	0.665511	-0.587465
94	l-valine	45.1939	118.085	POS		C00183	Amino acids and Peptides	Small peptides	Amino fatty acids	1.27349	4.77079e-10	6.28471e-09	5.56784	2.47712
95	dl-threonine	41.8703	120.065	POS	72-19-5		Amino acids and Peptides	Small peptides	Aminoacids	1.25968	3.82486e-09	3.4618e-08	2.66991	1.41679
96	genistin	300.312	433.11	POS		C09126	Shikimates and Phenylpropanoids	Isoflavonoids	Isoflavones	1.17897	2.58103e-05	6.65442e-05	0.642114	-0.639099
97	pipecolic acid	45.4209	130.085	POS		C00408	Amino acids and Peptides	Small peptides	Aminoacids	1.20418	1.24042e-17	3.19889e-14	110.479	6.78763
98	fraxetin	262.911	207.03	NEG			Shikimates and Phenylpropanoids	Coumarins	Simple coumarins	1.27256	1.74922e-08	1.22738e-07	0.165187	-2.59782
99	pc(16:1/16:1)	633.46	730.532	POS						1.03614	0.00171194	0.00300072	0.834146	-0.261628
100	hesperetin	294.986	303.084	POS		C01709	Shikimates and Phenylpropanoids	Flavonoids	Flavanones	1.26954	1.64264e-12	7.20432e-11	0.549125	-0.864793
101	pinoresinol	310.423	357.133	NEG						1.19296	7.81427e-06	2.30924e-05	1.29794	0.376219
102	hesperetin 7-o-glucoside	294.986	465.137	POS	2500-68-7		Shikimates and Phenylpropanoids	Flavonoids	Flavanones	1.26476	8.08656e-11	1.49618e-09	0.519209	-0.945613
103	carlina oxide	27.647	183.079	POS			Others	Others	Others	1.03558	0.000824259	0.00153211	0.857084	-0.222491
104	6,7,8-trimethoxy-2h-1-benzopyran-2-one	318.834	237.074	POS						1.26421	3.17764e-10	4.52081e-09	0.680109	-0.556162
105	d-aspartate	40.5647	132.03	NEG		C00402	Amino acids and Peptides	Small peptides	Aminoacids	1.21002	4.74057e-06	1.48582e-05	1.53408	0.617375
106	neoeriocitrin	276.416	597.176	POS			Shikimates and Phenylpropanoids	Flavonoids	Flavanones	1.26427	2.25494e-06	7.73434e-06	1.46693	0.552805
107	skimmin	227.487	383.097	NEG			Shikimates and Phenylpropanoids	Coumarins	Simple coumarins	1.25521	3.03011e-10	4.34769e-09	0.475531	-1.07239
108	euparin	459.185	217.085	POS			Shikimates and Phenylpropanoids	Coumarins	Simple coumarins	1.26565	1.64156e-10	2.64255e-09	0.421259	-1.24722
109	glycerol 3-phosphate; lc-tdda; ce30	56.4529	171.006	NEG			Carbohydrates	Saccharides	Monosaccharides	1.25591	7.75274e-05	0.00017971	0.226001	-2.1456
110	itaconate	72.9342	129.019	NEG		C00490	Fatty acids	Fatty Acids and Conjugates	Dicarboxylic acids	1.25675	1.93917e-09	1.97945e-08	0.609534	-0.714222
111	gamma-l-glutamyl-l-phenylalanine	226.137	295.127	POS						1.27302	1.17115e-09	1.30749e-08	5.35691	2.4214
112	naringin	292.371	581.182	POS		C09789	Shikimates and Phenylpropanoids	Flavonoids	Flavanones	1.2734	8.38106e-16	4.10386e-13	0.316319	-1.66055
113	traumatic acid	385.442	227.128	NEG	6402-36-4	C16308	Fatty acids	Fatty Acids and Conjugates	Dicarboxylic acids	1.05373	0.000587191	0.00112303	0.85882	-0.219573
114	3-hydroxybenzaldehyde	69.3544	123.044	POS			Shikimates and Phenylpropanoids	Phenolic acids	Simple phenolic acids	1.26755	3.94898e-13	2.41324e-11	4.51999	2.17632
115	4-feruloylquinic acid	280.46	369.116	POS			Shikimates and Phenylpropanoids	Phenylpropanoids	Cinnamic acids and derivatives	1.12667	0.000151734	0.00032986	0.927079	-0.109236
116	pc(14:1e/4:0)	495.981	522.342	POS						1.25131	2.06165e-09	2.08281e-08	0.44136	-1.17997
117	ldgts(18:3)	480.437	496.359	POS						1.13812	7.68575e-05	0.000178285	0.801128	-0.319896
118	4-oxo-5-phenylpentanoic acid	279.802	193.085	POS			Others	Others	Others	1.2575	2.54838e-09	2.4781e-08	0.439256	-1.18687
119	methyl caffeate	421.898	193.05	NEG			Shikimates and Phenylpropanoids	Phenylpropanoids	Cinnamic acids and derivatives	1.07654	0.00392793	0.00644378	2.22089	1.15114
120	lpg(18:2)	640.298	507.272	NEG						1.27025	3.74632e-08	2.31203e-07	0.408218	-1.29259
121	methoxybrassitin	305.607	251.09	POS	113900-63-3		Alkaloids	Tryptophan alkaloids	Simple indole alkaloids	1.26524	5.38575e-11	1.08679e-09	1.71238	0.776001
122	methyl paraben	237.798	151.04	NEG						1.02153	0.00185244	0.00322812	0.850974	-0.232813
123	(~{e})-3-(3,4,5-trimethoxyphenyl)prop-2-enal	295.77	223.095	POS						1.27146	6.13925e-08	3.51517e-07	0.340472	-1.55439
124	3-epilupeol	543.514	427.387	POS			Terpenoids	Triterpenoids	Lupane triterpenoids	1.11395	0.000135277	0.000297224	0.364136	-1.45745
125	(2s)-8-[(e)-3-hydroxy-3-methylbut-1-enyl]-5,7-dimethoxy-2-phenyl-2,3-dihydrochromen-4-one	491.687	369.167	POS			Shikimates and Phenylpropanoids	Flavonoids	Flavanones	1.2727	5.34276e-08	3.13117e-07	0.274185	-1.86678
126	gigantol	403.886	297.11	POS			Shikimates and Phenylpropanoids	Stilbenoids	Monomeric stilbenes	1.00176	0.00013239	0.000291459	2.17618	1.1218
127	hesperetin 7-neohesperidoside	294.986	611.194	POS						1.26799	4.19101e-11	8.85381e-10	0.50657	-0.981167
128	dodecanedioic acid	399.828	229.144	NEG		C02678	Fatty acids	Fatty Acids and Conjugates	Dicarboxylic acids	1.18424	7.68949e-06	2.2766e-05	0.780887	-0.356813
129	salsoline	488.427	194.114	POS			Alkaloids	Tyrosine alkaloids	Isoquinoline alkaloids	1.19758	0.00206957	0.00357477	2.29356	1.19759
130	guanosine cyclic monophosphate	112.013	344.038	NEG		C00942	Carbohydrates	Nucleosides	Purine nucleotides	1.26514	8.94274e-07	3.47077e-06	0.0363076	-4.78359
131	suberosin	445.716	245.115	POS			Shikimates and Phenylpropanoids	Coumarins	Simple coumarins	1.27176	1.06481e-12	5.08424e-11	0.392865	-1.3479
132	magnolioside	254.897	353.086	NEG						1.08805	0.000560294	0.00107637	1.24349	0.314398
133	glutathione (reduced)	271.933	308.089	POS			Amino acids and Peptides	Small peptides		1.25317	1.59509e-05	4.34131e-05	1.8913	0.919375
134	(2r,3s,4s,5r,6r)-5-[(2s,3r,4r)-3,4-dihydroxy-4-(hydroxymethyl)oxolan-2-yl]oxy-2-(hydroxymethyl)-6-(2-phenylethoxy)oxane-3,4-diol	272.541	434.2	POS			Shikimates and Phenylpropanoids	Phenylethanoids	Phenylethanoids	1.20572	3.81569e-06	1.2292e-05	0.866534	-0.206672
135	coumaroyl hexoside (isomer of 690, 692)	272.806	325.093	NEG			Shikimates and Phenylpropanoids	Phenylpropanoids	Cinnamic acids and derivatives	1.27298	6.31641e-15	1.37741e-12	3.72957	1.89901
136	(1~{s},3~{r},4~{r},5~{r})-1,3-bis[[(~{e})-3-(3,4-dihydroxyphenyl)prop-2-enoyl]oxy]-4,5-dihydroxycyclohexane-1-carboxylic acid	292.635	515.118	NEG						1.27354	1.27738e-07	6.55111e-07	12.2732	3.61744
137	apigenin-7-o-glucuronide	286.396	447.102	POS			Shikimates and Phenylpropanoids	Flavonoids	Flavones	1.26919	1.65045e-11	4.2791e-10	0.48258	-1.05116
138	eriodictyol	276.416	289.068	POS		C05631	Shikimates and Phenylpropanoids	Flavonoids	Flavanones	1.26151	1.4089e-09	1.52108e-08	1.45293	0.538963
139	psoralen	267.712	187.038	POS		C09305	Shikimates and Phenylpropanoids	Coumarins	Furocoumarins	1.27361	2.77968e-16	2.0288e-13	0.422545	-1.24282
140	lpe(18:2)	501.315	476.276	NEG						1.25432	2.40553e-09	2.36801e-08	0.418005	-1.25841
141	quercetin	121.019	325.033	POS		C00389	Shikimates and Phenylpropanoids	Flavonoids	Flavonols	1.0596	0.00376183	0.00619045	0.908179	-0.138952
142	lpe(20:2)	529.127	504.309	NEG						1.25093	2.2153e-05	5.80547e-05	0.534641	-0.903358
143	indole-3-carboxaldehyde	206.323	146.059	POS		C00294	Alkaloids	Tryptophan alkaloids	Simple indole alkaloids	1.27323	1.24948e-07	6.43165e-07	5.69045	2.50854
144	diacetyl	61.726	85.0291	NEG		C00741	Fatty acids	Fatty acyls	Oxygenated hydrocarbons	1.15128	9.04359e-05	0.000206367	0.550413	-0.861413
145	(3~{r},5~{r})-3,5-bis[[(~{e})-3-(3,4-dihydroxyphenyl)prop-2-enoyl]oxy]-1,4-dihydroxycyclohexane-1-carboxylic acid	292.367	1050.28	POS						1.23662	4.97517e-07	2.09577e-06	204.83	7.67828
146	alternariol monomethylether	358.123	273.074	POS			Shikimates and Phenylpropanoids	Coumarins	Isocoumarins	1.20468	9.36406e-07	3.61327e-06	1.88735	0.916362
147	lpe(16:0)	519.856	452.277	NEG						1.26781	7.01553e-07	2.81955e-06	0.321872	-1.63544
148	mangiferin	296.968	423.089	POS		C10077	Shikimates and Phenylpropanoids	Xanthones	Plant xanthones	1.26049	4.05285e-11	8.60935e-10	2.79543	1.48307
149	lpe(18:0)	549.744	480.309	NEG						1.26361	5.56236e-06	1.70877e-05	0.195176	-2.35716
150	d-(+)-melezitose	43.0915	527.154	POS		C08243	Carbohydrates	Saccharides	Disaccharides	1.26261	1.25558e-09	1.37904e-08	0.416752	-1.26274
151	gamma-glutamylleucine	211.158	261.143	POS			Amino acids and Peptides	Small peptides	Aminoacids	1.25542	1.48039e-09	1.585e-08	1.85181	0.888936
152	[(2s,3s,4r,5r)-4-hydroxy-2,5-bis(hydroxymethyl)-2-[(2r,3r,4s,5s,6r)-3,4,5-trihydroxy-6-(hydroxymethyl)oxan-2-yl]oxyoxolan-3-yl] (e)-3-(4-hydroxy-3-methoxyphenyl)prop-2-enoate	92.3357	519.168	POS			Shikimates and Phenylpropanoids	Phenylpropanoids	Cinnamic acids and derivatives	1.16533	0.000133695	0.000294048	0.571461	-0.807274
153	(5s)-5-hydroxy-1,7-diphenylheptan-3-one	221.169	283.174	POS			Shikimates and Phenylpropanoids	Diarylheptanoids	Linear diarylheptanoids	1.26451	4.68659e-13	2.75009e-11	0.147712	-2.75914
154	(4s,5z,6s)-4-(2-methoxy-2-oxoethyl)-5-[2-[(e)-3-phenylprop-2-enoyl]oxyethylidene]-6-[(2s,3r,4s,5s,6r)-3,4,5-trihydroxy-6-(hydroxymethyl)oxan-2-yl]oxy-4h-pyran-3-carboxylic acid	253.436	205.05	NEG			Terpenoids	Meroterpenoids	Merohemiterpenoids	1.26478	1.11064e-12	5.25863e-11	0.26545	-1.91349
155	keracyanine	285.728	596.167	POS			Others	Others	Others	1.26052	1.82656e-10	2.87106e-09	1.59304	0.671782
156	(e)-methyl 4-coumarate	326.143	179.069	POS						1.26244	7.2523e-10	8.85266e-09	1.42814	0.514136
157	3-hydroxymethylglutarate	67.5957	161.045	NEG		C03761	Fatty acids	Fatty Acids and Conjugates	Dicarboxylic acids	1.19974	0.000413947	0.000818894	0.699218	-0.516187
158	pc(18:1/18:2)	633.268	784.569	POS						1.24142	7.6273e-08	4.22764e-07	1.59515	0.673692
159	pyrenophorol	362.787	335.146	POS			Polyketides	Macrolides	Macrolide lactones	1.25314	5.27115e-09	4.51315e-08	4.41961	2.14392
160	osmanthuside h	228.827	450.195	POS			Shikimates and Phenylpropanoids	Phenylethanoids	Phenylethanoids	1.27346	9.28708e-08	4.98986e-07	6.81958	2.76968
161	lpe(19:1)	542.45	492.308	NEG						1.26865	3.48897e-06	1.13482e-05	0.122748	-3.02623
162	naringenin chalcone	357.539	271.061	NEG		C06561	Shikimates and Phenylpropanoids	Flavonoids	Chalcones	1.27022	5.52413e-13	3.13328e-11	2.00661	1.00476
163	lpe(17:0)	535.109	466.29	NEG						1.26302	7.23534e-06	2.15677e-05	0.172027	-2.53929
164	lpc(18:3)	475.795	518.322	POS						1.09969	0.000681031	0.00128628	0.59696	-0.744294
165	sn-glycero-3-phosphocholine	41.3861	258.108	POS		C00670	Others	Others	Others	1.22533	6.84798e-07	2.75651e-06	1.45855	0.54453
166	pc(14:0/22:6)	594.631	778.532	POS						1.26138	1.6083e-06	5.76773e-06	2.53354	1.34115
167	allantoin	253.767	181.027	POS		C01551	Others	Others	Others	1.10602	0.00032807	0.000662943	0.788161	-0.343438
168	hinokitiol;beta-thujaplicin	381.884	163.076	NEG						1.17268	8.29708e-07	3.25381e-06	0.309573	-1.69165
169	(1r,3r,4s,5r)-1,3,4-trihydroxy-5-[(e)-3-(4-hydroxyphenyl)prop-2-enoyl]oxycyclohexane-1-carboxylic acid	231.747	339.105	POS			Shikimates and Phenylpropanoids	Phenylpropanoids	Cinnamic acids and derivatives	1.08796	0.00325003	0.00541107	2.03768	1.02693
170	aloesin	245.967	412.163	POS			Polyketides	Chromanes	Chromones	1.23159	0.000961443	0.00176338	6.50733	2.70207
171	alanine	41.8696	90.0544	POS		C00041	Amino acids and Peptides	Small peptides	Aminoacids	1.26118	1.5098e-06	5.46134e-06	0.372732	-1.42379
172	kaempferide	298.338	301.069	POS		C10098	Shikimates and Phenylpropanoids	Flavonoids	Flavonols	1.2421	1.1241e-07	5.87378e-07	0.807154	-0.309083
173	sebacic acid	353.841	201.113	NEG		C08277	Fatty acids	Fatty Acids and Conjugates	Dicarboxylic acids	1.22905	1.16428e-07	6.05104e-07	0.728086	-0.457818
174	dattelic acid	292.367	337.089	POS						1.25466	9.33589e-14	8.49742e-12	10.2607	3.35906
175	protoanemonin	44.3448	97.0279	POS		C07090	Others	Others	Others	1.27376	6.20405e-10	7.7821e-09	0.204633	-2.28889
176	formononetin	94.7211	269.087	POS		C00858	Shikimates and Phenylpropanoids	Isoflavonoids	Isoflavones	1.25104	5.00816e-11	1.02341e-09	0.250992	-1.99429
177	ostruthin	487.074	299.162	POS			Shikimates and Phenylpropanoids	Coumarins	Furocoumarins	1.26994	4.83487e-12	1.65657e-10	0.495011	-1.01447
178	gamma-glutamyltyrosine	109.866	309.108	NEG			Amino acids and Peptides	Small peptides	Aminoacids	1.2658	2.24167e-11	5.3927e-10	2.73829	1.45328
179	eugenol	336.25	163.076	NEG		C10453	Shikimates and Phenylpropanoids	Phenylpropanoids	Cinnamic acids and derivatives	1.27323	1.49499e-08	1.07732e-07	3.34127	1.7404
180	dea	645.178	74.096	POS	111-42-2	C06772	Alkaloids			1.10134	0.000203502	0.000429887	0.84239	-0.24744
181	9r,10s-epome	501.952	295.227	NEG		C14825	Fatty acids	Octadecanoids	Other Octadecanoids	1.27007	2.63387e-12	1.02708e-10	0.520833	-0.941106
182	lpe(18:1)	501.3	478.281	NEG						1.2375	4.73048e-08	2.81998e-07	0.400435	-1.32036
183	(+)-secoisolariciresinol	306.547	361.164	NEG						1.23243	5.76589e-07	2.3781e-06	1.32907	0.410413
184	sinapyl alcohol	308.905	193.085	POS		C02325	Shikimates and Phenylpropanoids	Phenylpropanoids	Cinnamic acids and derivatives	1.18512	1.18147e-07	6.12805e-07	0.00710373	-7.13721
185	umbelliferone	237.846	161.024	NEG		C09315	Shikimates and Phenylpropanoids	Coumarins	Simple coumarins	1.23925	1.23056e-07	6.34943e-07	1.36321	0.447007
186	salidroside	246.633	299.112	NEG		C06046	Shikimates and Phenylpropanoids	Phenylethanoids	Phenylethanoids	1.27364	6.96524e-10	8.56897e-09	6.08103	2.60432
187	3,3',4',5-tetrahydroxy-7-methoxyflavone	241.064	315.053	NEG		C10176	Shikimates and Phenylpropanoids	Flavonoids	Flavonols	1.22457	6.12933e-07	2.50556e-06	0.747465	-0.419923
188	harpagoside	228.827	517.151	POS		C09783	Terpenoids	Monoterpenoids	Iridoids monoterpenoids	1.2413	7.16668e-06	2.13994e-05	1.52433	0.608176
189	lpe(16:1)	486.763	450.261	NEG						1.05956	0.00313524	0.00523709	0.664185	-0.590342
190	xanthatin	371.062	264.158	POS			Terpenoids	Sesquiterpenoids	Guaiane sesquiterpenoids	1.26739	0.00312584	0.00522206	2557.04	11.3203
191	quercetin-3-o-deoxyhexoside	286.076	449.101	POS			Shikimates and Phenylpropanoids	Flavonoids	Flavonols	1.26543	2.66446e-07	1.22818e-06	0.552956	-0.854764
192	rosavin	309.182	427.159	NEG			Shikimates and Phenylpropanoids	Phenylpropanoids		1.27372	1.08993e-08	8.2541e-08	0.194222	-2.36422
193	coniferin	270.194	341.122	NEG		C00761	Shikimates and Phenylpropanoids	Phenylpropanoids	Cinnamic acids and derivatives	1.24567	4.03952e-08	2.46235e-07	1.1644	0.219582
194	coumaroyl quinic acid (isomer of 758, 760)	282.141	337.092	NEG			Shikimates and Phenylpropanoids	Phenylpropanoids	Cinnamic acids and derivatives	1.26084	9.4338e-06	2.72598e-05	0.671268	-0.575038
195	pc(16:0e/21:2)	552.304	786.635	POS						1.08212	0.000674063	0.0012743	0.437343	-1.19316
196	2-hydroxyquinoline	312.107	144.045	NEG			Alkaloids	Anthranilic acid alkaloids	Quinoline alkaloids	1.20659	0.00026554	0.00054722	0.618139	-0.693997
197	falcarindiol	484.787	259.17	NEG		C08449	Fatty acids	Fatty acyls	Fatty alcohols	1.21488	5.22607e-06	1.61815e-05	3.57797	1.83914
198	5-feruloylquinic acid	265.837	367.101	NEG						1.27208	1.95595e-13	1.44118e-11	2.37955	1.25069
199	lithospermoside	207.611	330.116	POS			Alkaloids	Small peptides	Aminoacids	1.23453	4.09267e-08	2.48926e-07	0.474766	-1.07471
200	p-tolualdehyde	405.066	121.064	POS	104-87-0	C06758	Shikimates and Phenylpropanoids			1.22851	2.34788e-07	1.10276e-06	1.22054	0.287525
201	ldgts(16:0)	524.185	474.375	POS						1.27314	1.33668e-07	6.81149e-07	0.0915969	-3.44856
202	brunfelsamidine	40.5987	110.071	POS			Alkaloids	Nicotinic acid alkaloids	Pyridine alkaloids	1.27251	1.71386e-06	6.09965e-06	10.7509	3.42639
203	kakkalide	437.802	607.165	NEG			Others	Others	Others	1.26781	1.92185e-07	9.26625e-07	0.420022	-1.25146
204	mgmg 18:2	490.716	561.329	NEG			Fatty acids	Glycerolipids	Glycosyldiacylglycerols	1.14549	0.0172023	0.025293	0.363318	-1.4607
205	3-furanoic acid	74.858	111.008	NEG						1.26932	6.76922e-12	2.1341e-10	0.59105	-0.758648
206	phosphocholine	55.2279	184.072	POS		C00588	Others	Others	Others	1.17464	1.85538e-05	4.95797e-05	0.726224	-0.461514
207	pneumatopterin a	376.692	627.217	POS			Shikimates and Phenylpropanoids	Flavonoids	Leucoanthocyanidins	1.26463	7.42668e-13	3.88225e-11	0.250145	-1.99916
208	7-(2-hydroxypropan-2-yl)-1,4a-dimethyl-2,3,4,5,6,7,8,8a-octahydronaphthalen-1-ol	537.764	239.201	NEG			Terpenoids	Sesquiterpenoids	Eudesmane sesquiterpenoids	1.13271	0.000125913	0.000278412	0.716186	-0.481593
209	auraptene	487.417	297.148	NEG			Shikimates and Phenylpropanoids	Coumarins	Simple coumarins	1.26913	1.66885e-07	8.2143e-07	0.542126	-0.883299
210	phenylethanolamine	97.4279	120.08	POS		C02735	Alkaloids	Tyrosine alkaloids	Phenylethylamines	1.24364	0.000955987	0.00175454	15.1085	3.91729
211	isoscopoletin	391.213	193.048	POS			Shikimates and Phenylpropanoids	Coumarins	Simple coumarins	1.27413	1.63954e-08	1.16286e-07	0.0387919	-4.6881
212	decursinol	282.687	245.081	NEG			Shikimates and Phenylpropanoids	Coumarins	Pyranocoumarins	1.26246	8.32462e-06	2.44363e-05	0.418971	-1.25508
213	fumaric acid	61.2114	139.002	POS		C00122	Fatty acids	Fatty Acids and Conjugates	Dicarboxylic acids	1.19362	0.000431316	0.000849132	0.443323	-1.17357
214	lactic acid; lc-tdda; ce20	49.5779	89.024	NEG			Fatty acids	Fatty Acids and Conjugates	Hydroxy fatty acids	1.25078	0.000517603	0.00100248	0.253497	-1.97996
215	uridine diphosphate-n-acetylglucosamine	64.5055	606.073	NEG		C00043	Carbohydrates	Nucleosides	Pyrimidine nucleotides	1.25703	1.44039e-09	1.54731e-08	1.64896	0.721558
216	marmesin galactoside	331.901	409.146	POS	156363-69-8		Shikimates and Phenylpropanoids	Coumarins	Furocoumarins	1.02944	0.000598533	0.00114298	0.411586	-1.28073
217	(+)-columbianetin	403.746	229.085	POS		C19707	Shikimates and Phenylpropanoids	Coumarins	Furocoumarins	1.27152	1.18573e-08	8.85303e-08	0.429309	-1.21991
218	lpe(18:3)	481.475	474.261	NEG						1.21722	1.37059e-06	5.02163e-06	0.588677	-0.764453
219	lpc(18:2)	496.265	578.345	NEG						1.22323	3.8597e-06	1.24183e-05	0.431721	-1.21183
220	dipropylphthalate	311.422	251.124	POS			Shikimates and Phenylpropanoids	Phenolic acids	Shikimic acids and derivatives	1.19597	5.98975e-06	1.8237e-05	0.835241	-0.259736
221	mgmg 18:3	491.398	513.305	NEG			Fatty acids	Glycerolipids	Glycosyldiacylglycerols	1.19861	0.00130131	0.00233275	1.96786	0.976626
222	bergaptol	437.481	203.032	POS	486-60-2	C00758	Shikimates and Phenylpropanoids	Coumarins	Furocoumarins	1.22817	2.5947e-06	8.75148e-06	0.414722	-1.26978
223	scopolin	235.175	413.108	NEG			Shikimates and Phenylpropanoids	Coumarins	Simple coumarins	1.23548	3.62228e-09	3.32118e-08	0.388662	-1.36341
224	peucedanol	246.76	265.105	POS			Shikimates and Phenylpropanoids	Coumarins	Simple coumarins	1.12352	0.000165931	0.000357768	1.06678	0.0932657
225	7,4'-dimethoxyisoflavone	385.865	283.094	POS			Shikimates and Phenylpropanoids	Isoflavonoids	Isoflavones	1.27213	3.52322e-13	2.21367e-11	2.56623	1.35965
226	levodopa	215.277	196.061	NEG		C00355	Alkaloids	Small peptides	Aminoacids	1.23498	7.67194e-11	1.433e-09	6.74462	2.75374
227	uridineiphosphatelucose	42.084	565.046	NEG						1.22878	0.000813642	0.0015134	6.47173	2.69415
228	[1-hydroxy-1-(4-methoxyphenyl)propan-2-yl] 4-methoxybenzoate	422.914	299.126	POS			Shikimates and Phenylpropanoids	Phenolic acids	Simple phenolic acids	1.25005	1.21121e-08	9.0085e-08	1.3658	0.449745
229	duartin (-)	261.766	355.171	POS			Shikimates and Phenylpropanoids	Isoflavonoids	Isoflavanones	1.26073	1.02215e-09	1.17051e-08	0.664795	-0.589019
230	narirutin	292.368	603.163	POS		C09793	Shikimates and Phenylpropanoids	Flavonoids	Flavanones	1.26829	4.5153e-14	5.27388e-12	0.230344	-2.11814
231	estragole	424.179	149.095	POS		C10452	Shikimates and Phenylpropanoids	Phenylpropanoids	Cinnamic acids and derivatives	1.26795	6.2265e-11	1.22078e-09	0.476197	-1.07037
232	lpc(15:0)	497.991	540.329	NEG						1.27179	1.42651e-07	7.20762e-07	0.252563	-1.98528
233	procyanidin b2	296.979	601.115	POS		C17639	Shikimates and Phenylpropanoids	Flavonoids	Proanthocyanins	1.26445	2.0987e-12	8.64243e-11	7.10047	2.82792
234	lpc(19:1)	552.742	536.37	POS						1.1229	0.000265962	0.000548033	1.37896	0.463582
235	cis-9,10-epoxystearic acid	449.967	281.245	POS		C19620	Fatty acids	Octadecanoids	Other Octadecanoids	1.20742	5.66145e-06	1.73632e-05	0.63671	-0.651291
236	bis[[4-[(2~{s},3~{r},4~{s},5~{s},6~{r})-3,4,5-trihydroxy-6-(hydroxymethyl)oxan-2-yl]oxyphenyl]methyl] (2~{r})-2-hydroxy-2-(2-methylpropyl)butanedioate	267.741	761.229	NEG						1.27029	4.37691e-09	3.86293e-08	0.135667	-2.88186
237	coixol	365.74	164.035	NEG						1.26627	1.86731e-10	2.92088e-09	0.511474	-0.967268
238	4'-hydroxyacetophenone	297.27	135.045	NEG		C10700	Shikimates and Phenylpropanoids			1.27342	1.50802e-10	2.46868e-09	4.22708	2.07966
239	caffeate	237.202	163.038	POS		C01481	Shikimates and Phenylpropanoids	Phenylpropanoids	Cinnamic acids and derivatives	1.21754	9.03305e-07	3.50126e-06	1.3318	0.413378
240	benzyl salicylate	410.929	227.071	NEG			Shikimates and Phenylpropanoids	Phenolic acids	Simple phenolic acids	1.23426	8.06516e-08	4.42908e-07	1.33195	0.41354
241	4-ethylbenzaldehyde	414.486	135.08	POS	4748-78-1		Shikimates and Phenylpropanoids			1.22136	1.01633e-06	3.87221e-06	0.828631	-0.271198
242	uridine	49.5124	243.062	NEG		C00299	Carbohydrates	Nucleosides	Pyrimidine nucleosides	1.2509	1.36531e-08	9.98946e-08	0.532916	-0.908021
243	adipic acid	211.963	145.05	NEG		C06104	Fatty acids	Fatty Acids and Conjugates	Dicarboxylic acids	1.25809	0.000119614	0.000265829	0.123711	-3.01495
244	anisocoumarin h	465.605	337.142	POS			Shikimates and Phenylpropanoids	Coumarins	Simple coumarins	1.16334	0.00442487	0.0072031	0.469933	-1.08947
245	rhoifolin	300.512	577.153	NEG		C12627	Shikimates and Phenylpropanoids	Flavonoids	Flavones	1.26925	1.2738e-11	3.50957e-10	0.61194	-0.708538
246	(1s,4as,7ar)-7-methyl-1-[(2s,3r,4s,5s,6r)-3,4,5-trihydroxy-6-(hydroxymethyl)oxan-2-yl]oxy-4a-[(2s,3r,4r,5r,6s)-3,4,5-trihydroxy-6-methyloxan-2-yl]oxy-1,7a-dihydrocyclopenta[c]pyran-5-one	229.243	489.16	NEG			Terpenoids	Monoterpenoids	Iridoids monoterpenoids	1.15768	5.99636e-05	0.00014227	1.32895	0.410286
247	2-methylmaleate	61.4484	129.019	NEG		C02226	Fatty acids	Fatty Acids and Conjugates	Dicarboxylic acids	1.23289	6.25688e-08	3.57194e-07	0.536334	-0.898795
248	aloenin	266.349	411.125	POS			Polyketides	Cyclic polyketides	2-pyrone derivatives	1.2698	4.63173e-12	1.5983e-10	4.14244	2.05048
249	fa 18:1+3o	407.275	329.232	NEG			Fatty acids	Octadecanoids	Other Octadecanoids	1.27048	9.71738e-13	4.77921e-11	0.327269	-1.61145
250	adenosine diphosphate	89.3207	428.034	POS		C00008	Carbohydrates	Nucleosides	Purine nucleotides	1.20295	1.02261e-06	3.89118e-06	0.488002	-1.03504
251	2-methoxycinnamaldehyde	597.676	163.074	POS			Shikimates and Phenylpropanoids	Phenylpropanoids	Cinnamic acids and derivatives	1.26724	1.7884e-11	4.52162e-10	0.386634	-1.37096
252	isomucronulatol	408.632	301.108	NEG	64474-51-7		Shikimates and Phenylpropanoids	Isoflavonoids	Isoflavanones	1.26197	1.48203e-10	2.43682e-09	0.262668	-1.92869
253	tangeritin	385.242	373.125	POS		C10190	Shikimates and Phenylpropanoids	Flavonoids	Flavones	1.25996	4.73085e-10	6.25012e-09	1.64454	0.717686
254	7-[(e)-3-methyl-4-(4-methyl-5-oxo-2h-furan-2-yl)but-2-enoxy]chromen-2-one	261.625	365.085	POS			Shikimates and Phenylpropanoids	Coumarins	Simple coumarins	1.15563	4.89207e-05	0.000118438	1.2112	0.276436
255	pyridoxine + o-hex	45.7254	332.132	POS			Alkaloids	Nicotinic acid alkaloids	Pyridine alkaloids	1.2587	7.36791e-10	8.95703e-09	2.34367	1.22877
256	1,2-dihydroxyheptadec-16-en-4-yl acetate	301.629	367.218	POS			Fatty acids	Fatty acyls	Fatty alcohols	1.1979	4.2831e-06	1.35861e-05	0.667155	-0.583905
257	3-methyl pyruvic acid	46.3937	101.024	NEG	600-18-0	C00109	Fatty acids	Fatty Acids and Conjugates	Oxo fatty acids	1.18101	0.00173752	0.00304294	0.610333	-0.712331
258	guaijaverin	424.602	435.092	POS	22255-13-6		Shikimates and Phenylpropanoids	Flavonoids	Flavonols	1.24173	1.91988e-05	5.11408e-05	0.332067	-1.59045
259	kainic acid	67.0687	212.09	NEG			Alkaloids	Ornithine alkaloids	Pyrrolidine alkaloids	1.25634	2.71378e-06	9.10075e-06	6.06035	2.5994
260	gallic acid hexoside	147.618	331.066	NEG			Shikimates and Phenylpropanoids	Phenolic acids	Simple phenolic acids	1.15316	5.63601e-14	6.15869e-12	0.0139047	-6.16828
261	2'-o-methyl-kurarinone	240.411	453.208	POS			Shikimates and Phenylpropanoids	Flavonoids	Flavanones	1.26683	3.4901e-07	1.54719e-06	0.123042	-3.02277
262	5,7-dihydroxychromone	309.978	177.019	NEG			Polyketides	Chromanes	Chromones	1.25824	4.44297e-09	3.91587e-08	1.57806	0.658155
263	(10e,15z)-9,12,13-trihydroxyoctadeca-10,15-dienoic acid	376.139	327.217	NEG			Fatty acids	Octadecanoids	Other Octadecanoids	1.27037	1.1529e-07	5.99914e-07	0.270619	-1.88567
264	demethyloleuropein	227.488	527.171	POS	52077-55-1		Terpenoids	Monoterpenoids	Secoiridoid monoterpenoids	1.26223	7.37254e-10	8.95985e-09	0.678886	-0.55876
265	(2~{s},3~{r},4~{r},5~{r},6~{r})-2-methyl-6-[[(2~{r},3~{s},4~{s},5~{r},6~{r})-3,4,5-trihydroxy-6-(2-phenylethoxy)oxan-2-yl]methoxy]oxane-3,4,5-triol	279.131	448.215	POS						1.24609	1.96498e-11	4.87501e-10	0.12369	-3.0152
266	orientin	322.382	447.092	NEG		C10114	Shikimates and Phenylpropanoids	Flavonoids	Flavones	1.18204	1.70534e-07	8.36198e-07	0.384201	-1.38007
267	tulipinolide	456.965	289.144	NEG			Terpenoids	Sesquiterpenoids	Germacrane sesquiterpenoids	1.26719	2.09291e-11	5.11435e-10	1.8102	0.856148
268	(2r,3r,4s,5s,6r)-2-[(e)-5-[(1r,4as,5s,6r,8as)-6-hydroxy-5,8a-dimethyl-2-methylidene-5-[[(2r,3r,4s,5s,6r)-3,4,5-trihydroxy-6-(hydroxymethyl)oxan-2-yl]oxymethyl]-3,4,4a,6,7,8-hexahydro-1h-naphthalen-1-yl]-3-methylpent-2-enoxy]-6-(hydroxymethyl)oxane-3,4,5-triol	511.606	669.359	POS			Terpenoids	Diterpenoids	Labdane diterpenoids	1.26861	1.16718e-05	3.29034e-05	0.109321	-3.19335
269	8-(2-hydroxypropan-2-yl)furo[2,3-h]chromen-2-one	267.914	245.079	POS						1.27259	2.11142e-14	3.22831e-12	0.397546	-1.3308
270	(3'x,5'a,9'x,10'b)-o-(3-hydroxy-6-oxo-7-drimen-11-yl)umbelliferone	464.652	397.195	POS			Shikimates and Phenylpropanoids	Coumarins	Drimane sesquiterpenoids	1.12124	0.000191759	0.000407662	1.11509	0.157159
271	7-[(2~{s},3~{r},4~{s},5~{s},6~{r})-6-[[(2~{r},3~{r},4~{r})-3,4-dihydroxy-4-(hydroxymethyl)oxolan-2-yl]oxymethyl]-3,4,5-trihydroxyoxan-2-yl]oxy-8-methoxy-3-(4-methoxyphenyl)chromen-4-one	45.8484	637.18	NEG						1.25336	5.35242e-05	0.000128354	0.462051	-1.11388
272	paeonolide	298.562	459.149	NEG			Polyketides	Phloroglucinols	Acyl phloroglucinols	1.22243	0.000309868	0.000629286	0.0801215	-3.64167
273	ldgts(18:2)	500.187	498.376	POS						1.25393	2.61795e-09	2.53556e-08	0.599095	-0.739143
274	ldgts(15:0)	508.406	460.361	POS						1.26792	4.53998e-14	5.27388e-12	0.084336	-3.56771
275	4-[(e)-2-[(1r,4as,5r,6r,8ar)-6-hydroxy-5-(hydroxymethyl)-5,8a-dimethyl-2-methylidene-3,4,4a,6,7,8-hexahydro-1h-naphthalen-1-yl]ethenyl]-2h-furan-5-one	226.718	371.165	POS			Terpenoids	Diterpenoids	Labdane diterpenoids	1.26121	1.09532e-11	3.12234e-10	5.89444	2.55936
276	bruceine d	341.412	393.152	POS			Terpenoids	Triterpenoids	Quassinoids	1.22959	5.37471e-07	2.23903e-06	0.684775	-0.546299
277	oxyresveratrol	329.993	245.079	POS		C10273	Shikimates and Phenylpropanoids	Stilbenoids	Monomeric stilbenes	1.21548	1.83642e-06	6.48101e-06	0.814699	-0.295662
278	polydatin	300.534	449.144	NEG		C10275	Shikimates and Phenylpropanoids	Stilbenoids	Monomeric stilbenes	1.25591	3.09103e-09	2.90996e-08	1.38419	0.469042
279	leonurine	253.164	334.138	POS			Alkaloids			1.27237	4.25014e-09	3.7821e-08	21.4837	4.42517
280	3,4-dimethyl-2,5-bis(3,4,5-trimethoxyphenyl)oxolane	423.074	471.177	POS			Shikimates and Phenylpropanoids	Lignans	Furanoid lignans	1.02016	0.00264852	0.00448371	1.3483	0.431144
281	raffinose	42.5354	503.159	NEG		C00492	Carbohydrates	Saccharides	Disaccharides	1.26813	1.77063e-06	6.27916e-06	0.269406	-1.89215
282	2-[[3,4-dihydroxy-4-(hydroxymethyl)oxolan-2-yl]oxymethyl]-6-[(5-hydroxy-1,7,7-trimethyl-2-bicyclo[2.2.1]heptanyl)oxy]oxane-3,4,5-triol	262.184	482.256	POS						1.27309	7.65147e-15	1.58279e-12	2.75003	1.45945
283	benzoyloxypaeoniflorin	103.159	599.159	NEG			Terpenoids	Monoterpenoids	Pinane monoterpenoids	1.26892	1.01171e-13	9.05928e-12	7.36329	2.88035
284	alpha-linolenic acid	534.816	277.216	NEG		C06427	Fatty acids	Fatty Acids and Conjugates	Unsaturated fatty acids	1.26903	1.86093e-06	6.55314e-06	0.239673	-2.06086
285	asarinin	385.832	355.115	POS		C10882	Shikimates and Phenylpropanoids	Lignans	Furofuranoid lignans	1.26831	3.0533e-11	6.84303e-10	1.45963	0.545603
286	ginkgolide a	383.887	407.133	NEG		C07601	Terpenoids	Sesquiterpenoids	Prezizaane sesquiterpenoids	1.19582	9.73242e-09	7.54014e-08	0.214787	-2.21902
287	emodin	364.774	288.093	POS		C10343	Polyketides	Polycyclic aromatic polyketides	Anthraquinones and anthrones	1.24095	2.87257e-05	7.33087e-05	0.478928	-1.06212
288	8-deoxylactucin	352.745	261.11	POS			Terpenoids	Sesquiterpenoids	Guaiane sesquiterpenoids	1.27092	3.34165e-12	1.24258e-10	0.413651	-1.27351
289	ricinoleic acid (purity≥99%)	495.391	297.243	NEG						1.22079	0.000198871	0.000421161	0.731324	-0.451417
290	eugenitin	323.432	221.079	POS			Polyketides	Chromanes	Chromones	1.27394	1.34655e-09	1.46234e-08	0.0375985	-4.73318
291	4-hydroxyquinoline	312.479	146.059	POS			Alkaloids	Anthranilic acid alkaloids	Acridone alkaloids	1.23141	3.55377e-07	1.57199e-06	0.598128	-0.741475
292	allantoic acid	41.8998	175.047	NEG		C00499	Amino acids and Peptides	Small peptides	Aminoacids	1.2416	3.92102e-09	3.52983e-08	5.8774	2.55518
293	fraxidin	239.138	223.058	POS			Shikimates and Phenylpropanoids	Coumarins	Simple coumarins	1.26427	2.49232e-06	8.44963e-06	0.511476	-0.967261
294	glycyrrhetic acid	419.602	493.324	POS		C02283	Terpenoids	Triterpenoids	Oleanane triterpenoids	1.12376	0.000144794	0.000316015	0.797051	-0.327255
295	isomeramazin	367.753	261.11	POS						1.2709	9.90974e-08	5.27506e-07	0.224723	-2.15378
296	mandelic acid, methyl ester	36.9712	189.051	POS			Others	Others	Others	1.01415	0.00294259	0.00494025	0.697786	-0.519144
297	xanthoxylol	309.617	357.131	POS	54983-95-8		Shikimates and Phenylpropanoids	Lignans	Furofuranoid lignans	1.22504	1.46929e-07	7.3881e-07	1.4692	0.555031
298	apiopaeonoside	257.2	459.149	NEG			Polyketides	Phloroglucinols	Acyl phloroglucinols	1.22589	9.31059e-09	7.2584e-08	3.59352	1.8454
299	udp-xylose	63.5276	535.034	NEG			Carbohydrates	Aminosugars and aminoglycosides		1.22356	1.00629e-06	3.83964e-06	0.76069	-0.394619
300	tracheloside	269.603	595.2	NEG			Shikimates and Phenylpropanoids	Lignans	Dibenzylbutyrolactone lignans	1.24885	2.41254e-08	1.60351e-07	1.33677	0.418749
301	3-[(2s,3r,4s,5s,6r)-6-[[(2r,3r,4r)-3,4-dihydroxy-4-(hydroxymethyl)oxolan-2-yl]oxymethyl]-3,4,5-trihydroxyoxan-2-yl]oxy-2-methylpyran-4-one	396.481	459.081	POS			Terpenoids	Monoterpenoids	Iridoids monoterpenoids	1.24806	2.63396e-11	6.07207e-10	0.212844	-2.23213
302	glyceric acid	55.7919	105.019	NEG		C00258	Fatty acids	Fatty Acids and Conjugates	Hydroxy fatty acids	1.25159	1.55125e-05	4.23629e-05	0.449264	-1.15436
303	decuroside iii	270.596	571.198	POS			Shikimates and Phenylpropanoids	Coumarins	Furocoumarins	1.27035	6.35786e-13	3.46885e-11	0.469236	-1.09161
304	paulownin	123.446	409.076	POS			Shikimates and Phenylpropanoids	Lignans	Furofuranoid lignans	1.12677	0.00023378	0.000487431	0.572927	-0.803578
305	orcinol glucoside	268.26	331.103	NEG			Polyketides			1.26009	2.81452e-10	4.07616e-09	1.94526	0.959964
306	chromone	266.643	147.043	POS	491-38-3		Polyketides	Chromanes	Chromones	1.09144	0.000355469	0.000713132	0.380037	-1.39579
307	7-hydroxy-1,4a-dimethyl-9-oxo-7-propan-2-yl-2,3,4,4b,5,6,10,10a-octahydrophenanthrene-1-carboxylic acid	361.876	352.243	POS			Terpenoids	Diterpenoids	Abietane diterpenoids	1.07507	0.000529632	0.00102403	1.20728	0.27176
308	androsin	264.318	327.107	NEG						1.26997	4.96947e-14	5.604e-12	3.59004	1.844
309	5,2'-dihydroxy-3,6,7,8,4',5'-hexamethoxyflavone	347.519	435.124	POS			Shikimates and Phenylpropanoids	Flavonoids	Flavonols	1.2737	1.26799e-08	9.37312e-08	3.41304	1.77106
310	4-hydroxy-2,6,6-trimethyl-3-oxo-1,4-cyclohexadiene-1-carboxaldehyde	227.389	181.085	POS	35692-95-6		Polyketides	Cyclic polyketides	Simple cyclic polyketides	1.25787	1.19575e-09	1.32726e-08	0.71527	-0.48344
311	kanzonol d	437.474	323.125	POS			Shikimates and Phenylpropanoids	Flavonoids	Flavones	1.0449	0.00101101	0.00184745	1.48866	0.574018
312	hexcer/ns(d18:2/16:1)	631.336	696.537	POS						1.24141	5.58765e-05	0.000133441	0.458584	-1.12474
313	methyl (4s,5e,6s)-5-ethylidene-4-[2-oxo-2-[(2s,3r,4s,5s,6r)-3,4,5-trihydroxy-6-(hydroxymethyl)oxan-2-yl]oxyethyl]-6-[(2s,3r,4s,5s,6r)-3,4,5-trihydroxy-6-(hydroxymethyl)oxan-2-yl]oxy-4h-pyran-3-carboxylate	223.29	565.176	NEG			Terpenoids	Monoterpenoids	Secoiridoid monoterpenoids	1.1013	0.000163799	0.000353545	0.781525	-0.355636
314	l-alanine	40.5697	88.04	NEG		C00041	Amino acids and Peptides	Small peptides	Aminoacids	1.1549	5.54363e-05	0.000132471	1.16815	0.224229
315	epinepetalactone	399.821	167.106	POS	17257-15-7		Terpenoids	Monoterpenoids	Iridoids monoterpenoids	1.26809	5.14236e-11	1.04531e-09	0.631201	-0.663829
316	deguelin	363.748	395.146	POS						1.25583	1.94918e-13	1.43893e-11	8.13525	3.02419
317	isosakuranin	381.928	447.129	NEG			Shikimates and Phenylpropanoids	Flavonoids	Flavanones	1.22972	9.22176e-09	7.20221e-08	0.386302	-1.3722
318	(2r,3s,4s,5r,6r)-2-[[(2r,3r,4r,5s)-3,4-dihydroxy-5-(hydroxymethyl)oxolan-2-yl]oxymethyl]-6-[(2e)-3,7-dimethylocta-2,6-dienoxy]oxane-3,4,5-triol	256.387	447.222	NEG			Terpenoids	Monoterpenoids	Acyclic monoterpenoids	1.24437	2.24364e-08	1.50783e-07	1.56375	0.645012
319	xanthone	197.305	197.056	POS			Shikimates and Phenylpropanoids	Coumarins	Plant xanthones	1.20589	3.26976e-06	1.07108e-05	0.704065	-0.506219
320	norswertianolin	262.857	423.087	POS			Shikimates and Phenylpropanoids	Xanthones	Plant xanthones	1.23792	9.57996e-08	5.1215e-07	0.398764	-1.32639
321	toringin	314.095	417.116	POS	1329-10-8		Shikimates and Phenylpropanoids	Flavonoids	Flavones	1.27251	2.2209e-14	3.29161e-12	0.341591	-1.54966
322	3,4,5-trimethoxycinnamic acid	387.275	239.09	POS			Shikimates and Phenylpropanoids	Phenylpropanoids	Cinnamic acids and derivatives	1.26732	6.27232e-15	1.37741e-12	0.0817428	-3.61277
323	ethiin	121.311	166.057	POS	17795-08-3		Others	Others	Others	1.27087	1.04362e-07	5.52113e-07	3.26621	1.70762
324	spathulenol	394.485	221.188	POS			Terpenoids	Sesquiterpenoids	Aromadendrane sesquiterpenoids	1.16846	2.40598e-05	6.25811e-05	0.634234	-0.656913
325	(2r,3s,4s,5r,6s)-2-(hydroxymethyl)-6-[4-hydroxy-2-(3-methylbut-2-enyl)phenoxy]oxane-3,4,5-triol	385.176	379.113	POS			Shikimates and Phenylpropanoids			1.21085	3.76568e-07	1.65138e-06	1.66609	0.736462
326	lpc(18:1)	518.445	580.362	NEG						1.26763	4.35803e-06	1.37899e-05	0.277401	-1.84995
327	dimethyl succinate	320.664	147.066	POS	106-65-0		Fatty acids	Fatty esters	Wax monoesters	1.24244	8.14101e-08	4.46503e-07	0.570637	-0.809356
328	2,3-dihydro-5-hydroxy-2-methyl-1,4-naphthoquinone	340.714	191.069	POS						1.26927	5.42819e-14	5.9994e-12	0.0875439	-3.51385
329	quinine	514.197	323.168	NEG		C06526	Alkaloids	Tryptophan alkaloids		1.23227	3.22282e-07	1.44627e-06	0.500026	-0.999924
330	5&#39;-methylthioadenosine	242.918	296.082	NEG			Carbohydrates	Nucleosides	Purine nucleosides	1.26945	1.4915e-11	3.96163e-10	0.455589	-1.13419
331	6,7-dihydroxycoumarin	293.99	177.019	NEG		C09263	Shikimates and Phenylpropanoids	Coumarins	Simple coumarins	1.09554	0.000142012	0.000310698	2.12008	1.08412
332	lpc(16:0)	544.487	540.332	NEG						1.26851	2.70099e-06	9.06651e-06	8.85002	3.14568
333	9-oxoode	487.423	293.212	NEG		C14766	Fatty acids	Octadecanoids	Other Octadecanoids	1.27101	1.17798e-07	6.11157e-07	0.321398	-1.63757
334	(2r,3s,4s,5r,6s)-2-(hydroxymethyl)-6-[4-prop-2-enyl-2-[(2s,3r,4s,5s,6r)-3,4,5-trihydroxy-6-(hydroxymethyl)oxan-2-yl]oxyphenoxy]oxane-3,4,5-triol	502.461	475.186	POS			Shikimates and Phenylpropanoids	Phenylpropanoids	Cinnamic acids and derivatives	1.17375	0.000205901	0.000434265	29.7284	4.89377
335	3-(5-hydroxy-2,2,7,8-tetramethyl-6-oxo-7,8-dihydropyrano[3,2-g]chromen-10-yl)hexanoic acid	485.447	387.177	NEG			Polyketides			1.27008	1.2691e-07	6.51976e-07	6.13617	2.61734
336	4,5-dicaffeoylquinic acid	334.966	515.118	NEG						1.26772	3.17411e-05	8.02407e-05	7.20724	2.84945
337	(2s)-6-[(2s)-5,7-dihydroxy-2-(4-hydroxyphenyl)-4-oxo-2,3-dihydrochromen-8-yl]-5,7-dihydroxy-2-(4-hydroxyphenyl)-2,3-dihydrochromen-4-one	42.2278	543.127	POS			Shikimates and Phenylpropanoids	Flavonoids	Flavanones	1.26704	1.52306e-10	2.48803e-09	0.318331	-1.6514
338	lubimin	365.337	237.183	POS			Terpenoids	Sesquiterpenoids	Spirovetivane sesquiterpenoids	1.2384	4.82215e-08	2.86712e-07	2.62327	1.39137
339	kurarinone	449.309	461.193	POS		C17446	Shikimates and Phenylpropanoids	Flavonoids	Flavanones	1.15178	7.60115e-07	3.02008e-06	4.70803	2.23512
340	catechin pentaacetate	228.916	518.155	POS			Shikimates and Phenylpropanoids	Flavonoids	Flavan-3-ols	1.25718	3.25182e-09	3.0316e-08	1.62599	0.701318
341	episyringaresinol 4'-o-β-d-glncopyranoside	272.868	625.212	NEG						1.25451	1.13335e-08	8.53612e-08	0.699314	-0.515989
342	5-geranyloxy-7-methoxycoumarin	466.625	329.172	POS	7380-39-4		Shikimates and Phenylpropanoids	Coumarins	Simple coumarins	1.22631	2.5694e-11	5.97667e-10	0.147629	-2.75995
343	menadione	295.823	173.059	POS		C05377	Polyketides	Meroterpenoids	Naphthoquinones	1.27234	1.9903e-13	1.45031e-11	0.283698	-1.81757
344	arabinofuranosyluracil	87.0993	243.062	NEG			Carbohydrates	Nucleosides	Pyrimidine nucleosides	1.27044	4.83437e-07	2.04291e-06	0.163784	-2.61014
345	sesamoside	396.531	421.125	POS			Terpenoids	Monoterpenoids	Iridoids monoterpenoids	1.27144	5.30159e-07	2.21422e-06	0.384198	-1.38008
346	cis-zeatin	207.304	220.116	POS		C00371	Alkaloids	Pseudoalkaloids	Purine alkaloids	1.14621	0.000404467	0.000801866	1.2362	0.305908
347	hieracin	101.117	303.051	POS			Shikimates and Phenylpropanoids	Flavonoids	Flavones	1.26814	8.10891e-07	3.19557e-06	4.00954	2.00344
348	xanthotoxol	387.91	203.032	POS		C00841	Shikimates and Phenylpropanoids	Coumarins	Furocoumarins	1.27022	2.35202e-08	1.56922e-07	0.57494	-0.798516
349	7-methoxy-6-(1,2,3-trihydroxy-3-methylbutyl)chromen-2-one	325.537	295.109	POS			Shikimates and Phenylpropanoids	Coumarins	Simple coumarins	1.27355	2.56298e-08	1.68297e-07	0.236904	-2.07763
350	kadsurin a	350.077	373.162	POS			Shikimates and Phenylpropanoids	Lignans	Furanoid lignans	1.24175	2.36414e-05	6.16211e-05	1.47272	0.558479
351	bungeiside c	244.496	429.139	NEG			Others	Others	Others	1.25551	2.74129e-06	9.1779e-06	0.582984	-0.778471
352	dihydroguaiaretic acid	486.739	329.175	NEG						1.26936	6.58354e-12	2.09261e-10	1.90866	0.932558
353	2,15-dioxapentacyclo[22.2.2.13,7.110,14.016,21]triaconta-1(26),3(30),4,6,10(29),11,13,16(21),17,19,24,27-dodecaene-4,5,8,17-tetrol 2	267.699	457.165	POS			Shikimates and Phenylpropanoids	Diarylheptanoids	Diarylether type diarylheptanoids	1.27049	9.4846e-07	3.65104e-06	4.96075	2.31056
354	tetradecanedioic acid	438.422	257.176	NEG	821-38-5	C11002	Fatty acids	Fatty Acids and Conjugates	Dicarboxylic acids	1.21303	9.5882e-07	3.68445e-06	0.711189	-0.491695
355	piperidine	49.6311	86.0959	POS		C01746	Alkaloids	Lysine alkaloids	Acetate-derived alkaloids	1.27301	2.13929e-08	1.4503e-07	6.11993	2.61351
356	palmitic acid	643.184	274.272	POS		C00249	Fatty acids	Fatty Acids and Conjugates	Unsaturated fatty acids	1.05638	0.000556969	0.00107105	1.34523	0.427848
357	maltol	43.9714	127.038	POS		C11918	Polyketides	Cyclic polyketides	4-pyrone derivatives	1.27328	7.62436e-16	3.98558e-13	0.223253	-2.16325
358	rutarin	267.974	425.141	POS		C09309	Shikimates and Phenylpropanoids	Coumarins	Furocoumarins	1.26193	1.80529e-06	6.38396e-06	0.541842	-0.884056
359	5,7-dihydroxy-2-phenyl-6-[3,4,5-trihydroxy-6-(hydroxymethyl)oxan-2-yl]-8-(3,4,5-trihydroxyoxan-2-yl)chromen-4-one	310.204	549.155	POS			Shikimates and Phenylpropanoids	Flavonoids	Flavones	1.19859	5.11791e-06	1.58877e-05	0.452235	-1.14486
360	baccatin iii	214.483	625.209	POS		C11900	Terpenoids	Diterpenoids	Taxane diterpenoids	1.02307	0.000645367	0.00122469	0.29498	-1.76131
361	dehydrosalsolidine	310.793	206.114	POS			Alkaloids	Tyrosine alkaloids	Aporphine alkaloids	1.14479	5.7311e-05	0.000136596	1.20094	0.264162
362	7-hydroxy-2-methyl-4-oxo-4h-1-benzopyran-5-acetic acid	38.7406	235.055	POS	94356-34-0		Polyketides	Chromanes	Chromones	1.24613	6.98738e-05	0.000163526	2.98372	1.57711
363	ldgts(24:0)	625.986	586.502	POS						1.26984	4.77383e-07	2.02064e-06	0.0377975	-4.72556
364	gibberellic acid	538.13	369.131	POS		C01699	Terpenoids	Diterpenoids	Gibberellins	1.11062	0.000274005	0.000563225	0.819536	-0.287121
365	acacetin	389.219	285.074	POS		C01470	Shikimates and Phenylpropanoids	Flavonoids	Flavones	1.25756	9.55164e-10	1.10724e-08	0.473124	-1.07971
366	coumarin + 1o + 1meo, o-hex-hex	229.92	515.139	NEG			Shikimates and Phenylpropanoids	Coumarins	Simple coumarins	1.26932	3.26881e-11	7.23797e-10	2.00204	1.00147
367	(1s,4as,7s,7as)-7-hydroxy-7-methyl-1-[(2s,3r,4s,5s,6r)-3,4,5-trihydroxy-6-[(4-hydroxybenzoyl)oxymethyl]oxan-2-yl]oxy-4a,5,6,7a-tetrahydro-1h-cyclopenta[c]pyran-4-carboxylic acid	300.535	495.149	NEG			Terpenoids	Monoterpenoids	Iridoids monoterpenoids	1.25328	7.87396e-09	6.31664e-08	1.32354	0.404404
368	cucurbitacin s	319.19	499.295	POS		C08806	Terpenoids	Triterpenoids	Cucurbitane triterpenoids	1.23907	1.88907e-07	9.12181e-07	1.48767	0.573051
369	2-hydroxy-4-methoxy-3-(3-methylbut-2-enyl)-6-pentylbenzoic acid	606.673	307.188	POS						1.13267	8.57117e-05	0.000196759	0.802765	-0.316951
370	glycitin	319.712	505.135	NEG			Shikimates and Phenylpropanoids	Isoflavonoids	Isoflavones	1.21176	2.80779e-06	9.37617e-06	0.441006	-1.18113
371	abyssinoflavanone iv	325.394	383.147	POS			Shikimates and Phenylpropanoids	Isoflavonoids	Isoflavanones	1.26595	6.5975e-07	2.66873e-06	5.12534	2.35765
372	succinoadenosine	207.723	384.112	POS	4542-23-8		Carbohydrates	Nucleosides	Purine nucleosides	1.27206	2.07841e-08	1.41572e-07	0.213069	-2.2306
373	(e)-3-(2-hydroxyphenyl)-2-propenal	265.085	149.059	POS	60125-23-7		Shikimates and Phenylpropanoids	Phenylpropanoids	Cinnamic acids and derivatives	1.25482	8.75995e-10	1.03154e-08	1.70085	0.766254
374	cafestol	298.457	317.205	POS		C09066	Terpenoids	Diterpenoids	Kaurane diterpenoids	1.23565	6.95078e-08	3.90326e-07	0.596428	-0.745581
375	(2r,3s,4s,5r,6r)-2-(hydroxymethyl)-6-[[(2r,3s,4s,5r,6s)-3,4,5-trihydroxy-6-[4-[(e)-3-hydroxyprop-1-enyl]-2,6-dimethoxyphenoxy]oxan-2-yl]methoxy]oxane-3,4,5-triol	264.289	573.156	POS			Shikimates and Phenylpropanoids	Monoterpenoids	Menthane monoterpenoids	1.26496	4.01545e-10	5.49062e-09	0.535062	-0.902221
376	(2~{r},3~{s},4~{s},5~{r},6~{s})-2-[[(2~{r},3~{r},4~{r})-3,4-dihydroxy-4-(hydroxymethyl)oxolan-2-yl]oxymethyl]-6-(2-methylbut-3-en-2-yloxy)oxane-3,4,5-triol	241.731	403.154	POS						1.26943	3.62351e-12	1.31251e-10	0.438723	-1.18862
377	fa 9:1+1o	337.873	171.102	NEG			Fatty acids	Fatty Acids and Conjugates	Oxo fatty acids	1.19505	2.83467e-06	9.45207e-06	0.772514	-0.372367
378	phenacylamine	100.667	136.075	POS			Alkaloids	Pseudoalkaloids	Phenylalanine-derived alkaloids	1.05977	0.0140734	0.021012	1.82048	0.86432
379	aspergillusenes a	461.247	235.168	POS			Terpenoids	Sesquiterpenoids	Bisabolane sesquiterpenoids	1.03998	0.0289268	0.0409561	0.569525	-0.812168
380	4'-demethylpodophyllotoxin	354.672	445.112	NEG			Shikimates and Phenylpropanoids	Lignans	Arylnaphthalene and aryltetralin lignans	1.00191	0.00246457	0.00419764	0.904133	-0.145394
381	hydroxyphenylacetylglycine	79.4385	210.075	POS	28116-23-6	C05596	Shikimates and Phenylpropanoids			1.264	6.67065e-11	1.28763e-09	2.22283	1.1524
382	tridecanoic acid	523.855	213.185	NEG		C17076	Fatty acids	Fatty Acids and Conjugates	Unsaturated fatty acids	1.15306	3.89865e-05	9.65378e-05	0.841198	-0.249483
383	5-o-methylvisammioside	272.736	497.162	NEG			Polyketides	Chromanes	Chromones	1.2283	1.6626e-07	8.19292e-07	0.627746	-0.671747
384	glucocerebrosides	631.293	714.548	POS			Fatty acids	Spingolipids	Neutral glycosphingolipids	1.23143	7.52042e-05	0.000174754	0.467723	-1.09627
385	amorphigenin	315.96	411.139	POS			Shikimates and Phenylpropanoids	Isoflavonoids	Rotenoids	1.25939	7.24809e-10	8.85031e-09	2.1143	1.08018
386	kanzonol q	326.734	261.11	POS	17053-75-7		Shikimates and Phenylpropanoids	Coumarins	Pyranocoumarins	1.2724	4.07576e-08	2.4817e-07	0.2837	-1.81756
387	gemichalcone a	385.941	517.183	POS			Shikimates and Phenylpropanoids	Flavonoids	Chalcones	1.26958	4.53225e-08	2.71984e-07	1.6054	0.682936
388	6,8-diprenylorobol	423.543	445.162	POS			Shikimates and Phenylpropanoids	Isoflavonoids	Isoflavones	1.0182	0.00175441	0.00307015	1.13314	0.180332
389	lpc(14:0)	480.156	526.314	NEG						1.26546	1.73568e-07	8.48706e-07	0.263743	-1.9228
390	[(2s,3r,4r,5r,6s)-2-[2-(3,4-dihydroxyphenyl)-5,7-dihydroxy-4-oxochromen-3-yl]oxy-4,5-dihydroxy-6-methyloxan-3-yl] 3,4,5-trihydroxybenzoate	309.572	623.098	POS			Shikimates and Phenylpropanoids	Flavonoids	Flavonols	1.19542	1.10111e-05	3.12526e-05	1.98222	0.987116
391	(2r)-8-[(2r,3s)-5,7-dihydroxy-2-(4-hydroxyphenyl)-4-oxo-2,3-dihydrochromen-3-yl]-5,7-dihydroxy-2-(4-hydroxyphenyl)-2,3-dihydrochromen-4-one	204.932	541.111	NEG			Shikimates and Phenylpropanoids	Flavonoids	Flavanones	1.17607	9.66052e-06	2.78277e-05	2.77958	1.47487
392	[(3~{a}~{r},4~{r},5~{r},9~{a}~{s},9~{b}~{r})-4-hydroxy-6,9-dimethyl-3-methylidene-2,7-dioxo-4,5,9~{a},9~{b}-tetrahydro-3~{a}~{h}-azuleno[4,5-b]furan-5-yl] (~{z})-2-methylbut-2-enoate	246.955	341.136	POS						1.21551	1.45261e-06	5.28115e-06	0.87385	-0.194542
393	phaseoloidin	74.7838	329.087	NEG						1.23	1.15135e-07	5.9921e-07	1.53077	0.614262
394	d-(+)-cellobiose	44.5273	360.147	POS		C06422	Carbohydrates	Saccharides	Disaccharides	1.27113	1.34983e-12	6.18489e-11	0.228496	-2.12976
395	2-[(2s,4ar,8as)-2-hydroxy-4a-methyl-8-methylidene-3,4,5,6,7,8a-hexahydro-1h-naphthalen-2-yl]prop-2-enoic acid	387.281	251.163	POS			Terpenoids	Sesquiterpenoids	Eudesmane sesquiterpenoids	1.02003	6.16203e-08	3.52612e-07	14.0872	3.81631
396	podophyllotoxin acetate	293.683	457.145	POS			Shikimates and Phenylpropanoids	Lignans	Arylnaphthalene and aryltetralin lignans	1.09385	0.000285446	0.000584537	1.1554	0.208393
397	rhein	35.9444	283.028	NEG		C10401	Polyketides	Polycyclic aromatic polyketides	Anthraquinones and anthrones	1.00177	0.00256261	0.00435046	0.811655	-0.301062
398	simplexoside	363.385	519.197	POS			Shikimates and Phenylpropanoids	Lignans	Furofuranoid lignans	1.27358	2.26032e-08	1.51693e-07	8.18578	3.03312
399	judaicin (eudesmane naphthofuran)	536.468	263.128	NEG		C09600	Terpenoids	Sesquiterpenoids	Eudesmane sesquiterpenoids	1.16766	3.06916e-05	7.78878e-05	0.591895	-0.756586
400	pyruvate	48.3983	87.0084	NEG		C00022	Fatty acids	Fatty Acids and Conjugates	Oxo fatty acids	1.26345	3.47154e-10	4.8638e-09	0.638315	-0.647659
401	dihydroferulic acid	239.788	195.066	NEG			Shikimates and Phenylpropanoids	Phenolic acids	Simple phenolic acids	1.18984	3.00225e-06	9.95167e-06	1.65195	0.724167
402	jacaglabroside b	310.235	621.162	POS			Shikimates and Phenylpropanoids			1.27172	5.57842e-13	3.15482e-11	2.24492	1.16666
403	7-methoxy-2-methyl-3-phenyl-4h-chromen-4-one	414.468	267.1	POS			Polyketides	Chromanes	Chromones	1.24285	2.98172e-09	2.82216e-08	7.14001	2.83593
404	[(2~{r},3~{s},4~{s},5~{r},6~{r})-6-[(2~{s},3~{s},4~{s},5~{r})-3,4-dihydroxy-2,5-bis(hydroxymethyl)oxolan-2-yl]oxy-3,4,5-trihydroxyoxan-2-yl]methyl 4-hydroxybenzoate	154.402	461.128	NEG						1.23684	1.75518e-07	8.56386e-07	2.74082	1.45461
405	2,4,5-trimethoxybenzoic acid	128.24	195.064	POS			Shikimates and Phenylpropanoids	Phenolic acids	Simple phenolic acids	1.17527	3.532e-05	8.83754e-05	1.66171	0.732669
406	curdione	339.397	237.183	POS		C17493	Terpenoids	Sesquiterpenoids	Germacrane sesquiterpenoids	1.19896	0.00108067	0.00196455	3.44867	1.78604
407	para-cresol	429.102	107.05	NEG		C01468	Others	Others	Others	1.27149	1.04172e-14	1.96571e-12	3.56951	1.83572
408	propylgallate	235.2	211.06	NEG						1.23295	3.77749e-07	1.65505e-06	0.289868	-1.78653
409	3-[(2~{e})-3,7-dimethylocta-2,6-dienyl]-2,4-dihydroxy-6-[(~{e})-2-phenylethenyl]benzoic acid	475.003	393.202	POS						1.26848	2.66782e-11	6.12823e-10	3.89773	1.96264
410	gossypol	385.176	541.182	POS			Terpenoids	Sesquiterpenoids	Cadinane sesquiterpenoids	1.21757	4.94573e-10	6.45465e-09	10.5677	3.4016
411	aloe-emodin	380.678	288.093	POS			Polyketides	Polycyclic aromatic polyketides	Anthraquinones and anthrones	1.09101	0.00018289	0.000390374	0.436371	-1.19637
412	smyrindioloside	268.178	423.129	NEG			Shikimates and Phenylpropanoids	Coumarins	Furocoumarins	1.27183	8.45444e-08	4.60948e-07	0.433294	-1.20658
413	methyl (2r)-2-(acetyloxy)-2-[(1s,3s,7r,8r,9r,12s,13r)-13-(furan-3-yl)-6,6,8,12-tetramethyl-17-methylidene-5,15-dioxo-2,14-dioxatetracyclo[7.7.1.0,.0,heptadecan-7-yl]acetate	361.7	551.223	POS						1.1684	8.44052e-14	7.983e-12	41.9184	5.38951
414	6'-o-beta-d-glucosylgentiopicroside	222.448	536.195	POS						1.27213	3.08797e-07	1.39368e-06	4.38935	2.13401
415	hydroxygardnutine	357.791	339.175	POS			Alkaloids	Tryptophan alkaloids	Corynanthe type alkaloids	1.27222	0.000120123	0.000266792	0.00436017	-7.8414
416	acetoacetic acid	43.9948	85.0279	POS		C00164	Fatty acids	Fatty Acids and Conjugates	Oxo fatty acids	1.27216	3.43279e-09	3.17529e-08	0.22189	-2.17208
417	2-hydroxy-4-methylbenzaldehyde	428.457	135.045	NEG	698-27-1		Shikimates and Phenylpropanoids			1.267	3.27832e-07	1.46692e-06	2.81129	1.49123
418	farnesal	478.345	221.188	POS			Terpenoids	Sesquiterpenoids	Farnesane sesquiterpenoids	1.2576	1.07338e-09	1.21765e-08	1.69896	0.764652
419	4-methyl-2-oxopentanoic acid	215.737	129.055	NEG		C00233	Fatty acids	Fatty Acids and Conjugates	Branched fatty acids	1.2537	4.32728e-09	3.83224e-08	1.37387	0.45825
420	lindenenol	441.426	213.126	POS						1.26437	7.57264e-09	6.1104e-08	649.887	9.34405
421	xanthophyll	562.653	568.425	POS	127-40-2		Terpenoids	Carotenoids (C40)	Carotenoids (C40)	1.10747	0.00293509	0.00492894	1.91058	0.93401
422	mulberrofuran g	280.371	563.171	POS						1.24142	9.82374e-08	5.24053e-07	1.29663	0.374764
423	3'-methoxypuerarin	267.7	447.124	POS			Shikimates and Phenylpropanoids	Isoflavonoids	Isoflavones	1.23553	8.24036e-08	4.50935e-07	0.437787	-1.1917
424	chrysanthemic acid, ethyl ester	341.435	197.152	POS			Terpenoids	Monoterpenoids	Irregular monoterpenoids	1.1425	9.83159e-05	0.00022255	1.18513	0.245049
425	2'-hydroxy-5',6'-dimethoxy-3,4-methylenedioxyfurano[2'',3'':4',3'] dihydrochalcone	323.517	371.111	POS			Shikimates and Phenylpropanoids	Flavonoids	Chalcones	1.26146	2.34873e-10	3.5093e-09	0.452395	-1.14435
426	(1s,8r,16s,17r)-11,12-dimethoxy-5,15-diazahexacyclo[13.4.2.0,.0,.0,.0,henicosa-2,9,11,13-tetraen-21-one	491.505	391.149	POS						1.19114	6.73849e-09	5.54017e-08	0.212165	-2.23674
427	glutamylphenylalanine	231.502	293.123	NEG			Amino acids and Peptides	Small peptides	Aminoacids	1.26868	1.59653e-11	4.16602e-10	0.470931	-1.08641
428	4-(3,4-dihydroxyphenyl)-7-hydroxy-5-[(2s,3r,4s,5s,6r)-3,4,5-trihydroxy-6-(hydroxymethyl)oxan-2-yl]oxychromen-2-one	294.991	466.139	POS			Shikimates and Phenylpropanoids	Coumarins	Simple coumarins	1.19576	3.77805e-06	1.21851e-05	0.564059	-0.826083
429	adenosine 3&#39;,5&#39;-cyclic monophosphate	184.963	330.057	POS			Carbohydrates	Nucleosides	Purine nucleotides	1.26757	6.47756e-08	3.68226e-07	0.0426715	-4.55058
430	2e,4e-hexadecadienoic acid	511.57	253.214	POS			Fatty acids	Fatty Acids and Conjugates	Unsaturated fatty acids	1.0839	0.000530322	0.00102516	0.818547	-0.288863
431	lpc(18:0)	545.106	582.377	NEG						1.26924	4.07239e-06	1.30138e-05	0.159386	-2.6494
432	3,7,8,4'-tetrahydroxyflavone	233.276	287.057	POS			Shikimates and Phenylpropanoids	Flavonoids	Flavonols	1.27316	8.09578e-08	4.44337e-07	5.15044	2.3647
433	aristolindiquinone	250.886	219.064	POS			Polyketides	Naphthalenes	Naphthoquinones	1.18738	8.98327e-06	2.6118e-05	0.805436	-0.312158
434	5-(8,11,14-pentadecatrienyl)resorcinol	92.5727	337.21	POS			Polyketides	Aromatic polyketides	Catechols	1.25585	0.000421537	0.000831869	15.0824	3.91479
435	inosine	96.837	267.073	NEG		C00294	Carbohydrates	Nucleosides	Purine nucleosides	1.2719	2.63068e-07	1.21558e-06	0.0271919	-5.20068
436	amaroswerin	56.3779	601.136	NEG			Terpenoids	Monoterpenoids	Secoiridoid monoterpenoids	1.24411	2.1432e-08	1.45244e-07	0.519973	-0.943492
437	5-[6-(3-hydroxy-4-methoxyphenyl)-1,3,3a,4,6,6a-hexahydrofuro[3,4-c]furan-3-yl]-2-methoxyphenol	386.913	357.132	NEG			Others	Others	Others	1.17032	1.60416e-05	4.36293e-05	1.21877	0.285428
438	iriflophenone 3-c-glucoside	280.458	409.107	POS						1.27309	2.63137e-14	3.75607e-12	0.359913	-1.47428
439	glechomanolide	451.345	233.152	POS			Terpenoids	Sesquiterpenoids	Germacrane sesquiterpenoids	1.22776	3.10814e-08	1.97816e-07	2.2738	1.18511
440	dehydrodiisoeugenol	360.579	327.156	POS			Shikimates and Phenylpropanoids	Lignans	Neolignans	1.2694	1.03091e-08	7.90167e-08	8.45149	3.07921
441	2-(3-hydroxy-5-methoxyphenoxy)-6-(hydroxymethyl)oxane-3,4,5-triol	205.664	303.103	POS			Polyketides	Phloroglucinols	Acyl phloroglucinols	1.23772	3.14364e-07	1.41566e-06	0.750358	-0.414349
442	goniothalenol	260.821	250.105	POS			Shikimates and Phenylpropanoids	Styrylpyrones	Kavalactones and derivatives	1.2292	5.25665e-07	2.19997e-06	3.23464	1.6936
443	dorsteniol	298.647	263.09	POS	80794-85-0		Shikimates and Phenylpropanoids	Coumarins	Furocoumarins	1.24445	1.45526e-08	1.05399e-07	0.671596	-0.574334
444	hydroxyisobutyric acid	53.0913	103.04	NEG			Fatty acids	Fatty Acids and Conjugates	Hydroxy fatty acids	1.24355	2.54352e-05	6.56771e-05	0.370903	-1.43089
445	2-phenylphenate tetrahydrate	397.19	171.079	POS			Shikimates and Phenylpropanoids	Terphenyls	p-Terphenyls	1.19437	7.54356e-06	2.23727e-05	1.9505	0.963843
446	neoglycyrol	414.613	365.1	NEG						1.23879	9.75482e-09	7.5507e-08	2.32747	1.21876
447	picrotoxinin	381.785	291.09	NEG			Others	Others	Others	1.25943	5.71368e-06	1.75095e-05	0.191982	-2.38096
448	hydroxyamentoflavone	292.395	555.087	POS			Shikimates and Phenylpropanoids	Flavonoids	Flavones	1.2699	5.11918e-15	1.20015e-12	13.126	3.71435
449	coumaric acid (isomer of 189, 192)	339.397	147.043	POS			Shikimates and Phenylpropanoids	Phenylpropanoids	Cinnamic acids and derivatives	1.23845	8.05017e-08	4.42148e-07	1.3292	0.410563
450	(z)-3-[4-methoxy-2-[(2s,3r,4s,5s,6r)-3,4,5-trihydroxy-6-(hydroxymethyl)oxan-2-yl]oxyphenyl]prop-2-enoic acid	418.622	355.117	NEG			Shikimates and Phenylpropanoids	Phenylpropanoids	Cinnamic acids and derivatives	1.27393	2.23508e-09	2.22889e-08	7.34946	2.87764
451	paleatin a	332.073	473.196	POS			Shikimates and Phenylpropanoids	Stilbenoids	Monomeric stilbenes	1.24559	8.83857e-08	4.78319e-07	1.54325	0.625971
452	alfafuran	334.014	259.056	POS	156098-99-6		Shikimates and Phenylpropanoids	Isoflavonoids	2-arylbenzofurans	1.23864	6.97997e-08	3.91711e-07	1.73145	0.791977
453	zingibroside r1	493.181	817.429	POS						1.25372	8.58118e-09	6.78132e-08	2.19474	1.13405
454	phenylalanine	55.3871	164.071	NEG		C00079	Amino acids and Peptides	Small peptides	Aminoacids	1.26063	2.0287e-09	2.05488e-08	3.02956	1.59911
455	brucine	323.827	417.171	POS			Alkaloids	Tryptophan alkaloids	Strychnos type	1.26422	1.13213e-09	1.27272e-08	0.545049	-0.875541
456	eudesmin	405.066	409.159	POS			Shikimates and Phenylpropanoids	Lignans	Furofuranoid lignans	1.26179	7.48378e-10	9.07738e-09	1.20662	0.270975
457	5,7,2'-trihydroxy-3,6,8,4',5'-pentamethoxyflavone	311.589	421.109	POS			Shikimates and Phenylpropanoids	Flavonoids	Flavonols	1.27297	8.45507e-10	1.00297e-08	4.10685	2.03803
458	2,3-dihydroxy-1-(4-hydroxy-3-methoxyphenyl)-propan-1-one	213.196	213.075	POS			Shikimates and Phenylpropanoids			1.25524	6.23442e-10	7.81485e-09	0.527458	-0.922872
459	5-hydroxyferulic acid	273.374	209.045	NEG						1.13287	0.00010099	0.000227963	0.886728	-0.173437
460	4-hydroxycoumarin	377.329	163.038	POS		C02646	Shikimates and Phenylpropanoids	Coumarins	Simple coumarins	1.17769	1.75208e-05	4.71745e-05	1.5374	0.620496
461	lpe(14:0)	485.634	426.259	POS						1.18209	2.22227e-09	2.219e-08	0.202364	-2.30498
462	atractylenolide ii	337.362	233.152	POS			Terpenoids	Sesquiterpenoids	Eudesmane sesquiterpenoids	1.19546	8.75545e-07	3.4104e-06	0.352598	-1.5039
463	lunarine	501.987	436.219	NEG			Others	Others	Others	1.26452	1.45905e-10	2.4048e-09	4.60003	2.20164
464	dl-glutamine	41.715	147.076	POS						1.26982	1.22957e-06	4.55995e-06	6.00579	2.58635
465	xanthopterin	273.773	197.079	POS			Alkaloids	Pseudoalkaloids	pteridine alkaloids	1.15432	2.76702e-05	7.08523e-05	1.25663	0.329555
466	7-hydroxy-2-(4-hydroxy-3,5-dimethoxyphenyl)-5-[(2~{s},3~{r},4~{s},5~{s},6~{r})-3,4,5-trihydroxy-6-(hydroxymethyl)oxan-2-yl]oxychromen-4-one	128.023	527.104	NEG						1.11802	0.000363774	0.00072847	0.640051	-0.643742
467	isorhoifolin	292.036	577.19	NEG			Shikimates and Phenylpropanoids	Flavonoids	Flavones	1.24097	7.0407e-08	3.9456e-07	0.856287	-0.223833
468	methoxyeugenol	311.229	195.1	POS	6627-88-9		Shikimates and Phenylpropanoids	Phenylpropanoids	Cinnamic acids and derivatives	1.27006	5.98768e-14	6.3458e-12	0.156783	-2.67316
469	psoralidin	384.543	353.102	NEG		C10523	Shikimates and Phenylpropanoids	Isoflavonoids	Coumestan	1.25336	8.86489e-09	6.96116e-08	1.55097	0.633172
470	lpi(16:0)	645.361	571.288	NEG						1.2642	4.8074e-07	2.03373e-06	0.262407	-1.93012
471	pinolenic acid	406.415	279.23	POS			Fatty acids	Fatty Acids and Conjugates	Unsaturated fatty acids	1.25934	1.18024e-05	3.32351e-05	0.630068	-0.666422
472	swertiamarin	94.7824	397.107	POS			Terpenoids	Monoterpenoids	Secoiridoid monoterpenoids	1.23959	0.000639722	0.00121473	4.04529	2.01624
473	gomisin m2	405.093	387.178	POS						1.25983	7.78017e-10	9.37571e-09	1.22343	0.290928
474	9-hydroxy-7-(2-hydroxypropan-2-yl)-1,4a-dimethyl-2,3,4,9,10,10a-hexahydrophenanthrene-1-carboxylic acid	402.342	350.228	POS			Terpenoids	Diterpenoids	Podocarpane diterpenoids	1.25519	1.24595e-08	9.22435e-08	0.635978	-0.652951
475	lactupicrin	359.964	455.131	NEG	65725-11-3	C09490	Terpenoids	Sesquiterpenoids	Guaiane sesquiterpenoids	1.19394	1.20208e-09	1.33314e-08	211.146	7.7221
476	7,8-dimethylalloxazine (lumichrome)	34.4108	243.018	POS			Alkaloids	Anthranilic acid alkaloids	Phenazine alkaloids	1.02714	0.00285056	0.00479761	0.778556	-0.361128
477	hydroxytanshinone	274.986	311.125	POS	18887-18-8		Polyketides	Naphthalenes	Naphthoquinones	1.24839	1.92434e-08	1.32904e-07	1.43477	0.52082
478	o-geranylconiferyl alcohol	485.784	317.207	POS			Shikimates and Phenylpropanoids	Monoterpenoids		1.24201	3.47387e-08	2.17137e-07	0.403151	-1.31061
479	epimedoside c	340.39	517.165	POS			Shikimates and Phenylpropanoids	Flavonoids	Flavonols	1.27154	0.000433412	0.000852868	0.00402196	-7.95789
480	biorobin	363.6	593.153	NEG	17297-56-2		Shikimates and Phenylpropanoids	Flavonoids	Flavonols	1.185	2.56084e-08	1.68242e-07	4.45785	2.15635
481	linoleoyl ethanolamide	522.843	324.288	POS			Fatty acids	Fatty acyls	Fatty alcohols	1.26871	6.61918e-12	2.09705e-10	0.399729	-1.3229
482	artemisin	420.543	261.113	NEG		C09538	Terpenoids	Sesquiterpenoids	Eudesmane sesquiterpenoids	1.26608	6.14575e-11	1.20985e-09	1.55316	0.635208
483	(2r,3s,4s,5r,6r)-2-(hydroxymethyl)-6-[(e)-3-(4-hydroxyphenyl)prop-2-enoxy]oxane-3,4,5-triol	274.782	311.113	NEG			Shikimates and Phenylpropanoids	Phenylpropanoids	Cinnamic acids and derivatives	1.21541	3.62081e-07	1.59854e-06	0.522366	-0.936866
484	oxoglutarate	47.6733	145.014	NEG		C00026	Fatty acids	Fatty Acids and Conjugates	Dicarboxylic acids	1.26815	1.38474e-07	7.0195e-07	0.25725	-1.95875
485	4-amino-1-((2r,3r,4s,5r)-3,4-dihydroxy-5-(hydroxymethyl)tetrahydrofuran-2-yl)pyrimidin-2(1h)-one	344.736	244.094	POS			Carbohydrates	Nucleosides	Pyrimidine nucleosides	1.25724	3.54067e-06	1.14989e-05	1.75993	0.815519
486	homogentisate	293.3	167.035	NEG		C00544	Shikimates and Phenylpropanoids	Phenolic acids	Simple phenolic acids	1.11636	0.000309324	0.000628345	1.95972	0.970645
487	genistein	455.001	269.045	NEG		C06563	Shikimates and Phenylpropanoids	Isoflavonoids	Isoflavones	1.2594	1.12521e-09	1.26605e-08	0.0310068	-5.01127
488	3b-hydroxy-6b-(3-chloro-2-hydroxy-2-methylbutanoyloxy)-7(11)-eremophilen-12,8b-olide	331.48	401.177	POS	171422-90-5		Terpenoids	Sesquiterpenoids	Eremophilane sesquiterpenoids	1.27229	5.94757e-16	3.33435e-13	6.08387	2.60499
489	chrysosplenetin	295.736	375.105	POS		C10030	Shikimates and Phenylpropanoids	Flavonoids	Flavonols	1.26408	5.641e-12	1.86665e-10	0.297662	-1.74825
490	angeloylgomisin q	514.862	531.271	POS						1.09209	0.000455528	0.000892754	1.33235	0.413976
491	rosmarinic acid	282.389	359.087	NEG		C01850	Shikimates and Phenylpropanoids	Phenylpropanoids	Cinnamic acids and derivatives	1.1809	1.06874e-05	3.04484e-05	0.538071	-0.894133
492	suberic acid	293.35	173.081	NEG		C08278	Fatty acids	Fatty Acids and Conjugates	Dicarboxylic acids	1.2488	8.77846e-11	1.59501e-09	0.227053	-2.1389
493	2,3',4,6-tetrahydroxybenzophenone	56.4899	269.038	POS			Polyketides	Phloroglucinols	Acyl phloroglucinols	1.2639	7.02692e-07	2.82266e-06	0.387296	-1.36849
494	(-)-phaseollidin	384.629	325.142	POS	37831-70-2	C05230	Shikimates and Phenylpropanoids	Isoflavonoids	Pterocarpan	1.27269	2.78539e-08	1.8036e-07	2.81056	1.49086
495	pseudolaric acid c	432.825	373.159	POS			Terpenoids	Diterpenoids		1.26709	2.33605e-11	5.57132e-10	0.292206	-1.77494
496	licoagrone	279.142	743.286	POS			Shikimates and Phenylpropanoids	Flavonoids	Aurones	1.23647	1.83677e-07	8.90596e-07	1.38429	0.46915
497	myricetin-3-o-xyloside	301.424	451.085	POS			Shikimates and Phenylpropanoids	Flavonoids	Flavonols	1.04021	0.00116764	0.00211055	1.0907	0.125248
498	dgdg(16:0/18:2)	634.572	934.641	POS						1.17536	0.000912017	0.00168054	0.590435	-0.76015
499	chlorohyssopifolin a	259.188	435.089	POS			Terpenoids	Sesquiterpenoids	Guaiane sesquiterpenoids	1.24436	2.09364e-07	9.97667e-07	0.418323	-1.25731
500	isosaxalin; heraclenol	362.783	305.1	POS			Shikimates and Phenylpropanoids	Coumarins	Furocoumarins	1.26605	8.70185e-12	2.59933e-10	0.393272	-1.3464
501	sweroside	239.798	357.118	NEG			Terpenoids	Monoterpenoids	Secoiridoid monoterpenoids	1.2697	4.27009e-12	1.50027e-10	2.29439	1.19811
502	(2r,3r,4s,5s,6r)-2-[2-(4-methoxyphenyl)ethoxy]-6-[[(2s,3r,4s,5s)-3,4,5-trihydroxyoxan-2-yl]oxymethyl]oxane-3,4,5-triol	272.386	464.209	POS			Shikimates and Phenylpropanoids	Phenylethanoids	Phenylethanoids	1.27331	1.39572e-09	1.51023e-08	0.30959	-1.69157
503	5-hydroxy-2,2-dimethyl-10-(2-methylbut-3-en-2-yl)pyrano[3,2-g]chromen-8-one	483.469	311.128	NEG			Shikimates and Phenylpropanoids	Coumarins	Simple coumarins	1.129	2.67926e-08	1.74452e-07	97.92	6.61353
504	geniposide	234.316	389.14	POS			Terpenoids	Monoterpenoids	Iridoids monoterpenoids	1.17992	2.14558e-05	5.63843e-05	1.19575	0.257915
505	shanzhiside methyl ester	295.667	429.136	POS			Terpenoids	Monoterpenoids	Iridoids monoterpenoids	1.26845	5.26463e-12	1.77552e-10	0.340146	-1.55577
506	hdmboa-glc	240.424	388.121	POS	113565-33-6		Others	Others	Others	1.17131	0.000359859	0.000721415	0.105553	-3.24396
507	pasakbumin a	230.48	409.144	POS						1.26205	6.18979e-12	1.997e-10	5.91196	2.56364
508	vicenin 2	229.086	595.166	POS			Shikimates and Phenylpropanoids	Flavonoids	Flavones	1.22887	1.08782e-10	1.90321e-09	10.0977	3.33596
509	11(13)-dehydroivaxillin	267.96	287.126	POS			Terpenoids	Sesquiterpenoids	Germacrane sesquiterpenoids	1.27288	7.22138e-09	5.87228e-08	0.397298	-1.33171
510	amygdalin	243.148	502.163	NEG		C08325	Alkaloids	Small peptides	Aminoacids	1.03053	0.000621556	0.00118278	2.28862	1.19448
511	6,4'-dimethoxyisoflavone-7-glucoside	65.215	459.134	NEG			Shikimates and Phenylpropanoids	Isoflavonoids	Isoflavones	1.26878	5.07512e-07	2.13114e-06	0.249308	-2.004
512	ginsenoside ro	402.482	974.527	POS		C17543	Terpenoids	Triterpenoids	Oleanane triterpenoids	1.21936	2.16471e-08	1.46317e-07	3.80936	1.92955
513	stachyose	247.619	665.229	NEG		C01613	Carbohydrates	Saccharides	Polysaccharides	1.26111	1.92652e-10	2.99773e-09	2.06772	1.04804
514	pc(9:0/24:4)	633.272	740.516	POS						1.21289	5.22639e-06	1.61815e-05	1.50989	0.594442
515	dihydromethysticin	285.072	277.106	POS		C09926	Shikimates and Phenylpropanoids	Styrylpyrones	Kavalactones and derivatives	1.06196	0.000962133	0.00176448	0.711262	-0.491547
516	cucurbitacin e	515.76	601.299	NEG		C08797	Terpenoids	Triterpenoids	Cucurbitane triterpenoids	1.26987	1.05978e-06	4.01602e-06	0.0426024	-4.55292
517	bilobalide	216.411	343.102	NEG	33570-04-6		Terpenoids	Sesquiterpenoids	Prezizaane sesquiterpenoids	1.24631	1.87671e-08	1.30359e-07	1.32825	0.409531
518	secundifloran	337.992	387.141	POS			Shikimates and Phenylpropanoids	Isoflavonoids	Isoflavanones	1.21241	0.000200892	0.000424977	0.853933	-0.227805
519	(3e,4r)-3-[2-[(1r,4as,5r,6r,8as)-6-hydroxy-5-(hydroxymethyl)-5,8a-dimethyl-2-methylidene-3,4,4a,6,7,8-hexahydro-1h-naphthalen-1-yl]ethylidene]-4-hydroxyoxolan-2-one	644.46	349.204	NEG			Terpenoids	Diterpenoids	Labdane diterpenoids	1.26131	0.00372696	0.00613907	0.00117905	-9.72816
520	mgdg(18:2/18:2)	626.285	796.587	POS						1.07452	0.0005277	0.00102045	1.54591	0.628452
521	(2r,3r,4s,5s,6r)-2-[(e)-3-(4-hydroxy-3-methoxyphenyl)prop-2-enoxy]-6-(hydroxymethyl)oxane-3,4,5-triol	288.102	341.123	NEG			Shikimates and Phenylpropanoids	Phenylpropanoids	Cinnamic acids and derivatives	1.15088	5.3596e-05	0.000128486	1.13874	0.187441
522	eriodictyol-7-o-glucoside	295.67	451.117	POS			Shikimates and Phenylpropanoids	Flavonoids	Flavanones	1.26881	8.94681e-12	2.66223e-10	0.326008	-1.61702
523	(-)-carvone	430.12	151.111	POS		C01767	Terpenoids	Monoterpenoids	Menthane monoterpenoids	1.27303	9.81255e-09	7.58703e-08	0.396979	-1.33286
524	alpha-tocopherol	616.22	430.373	POS		C02477	Terpenoids	Meroterpenoids	Prenyl quinone meroterpenoids	1.14543	0.00278679	0.00469948	2.15843	1.10998
525	uncinatone	283.067	327.156	POS			Terpenoids	Diterpenoids	Abeoabietane diterpenoids	1.08226	0.000398071	0.000789955	0.884683	-0.176768
526	agarotetrol	331.663	363.106	NEG						1.20761	3.83576e-07	1.6764e-06	1.78725	0.837743
527	lpc(16:1)	487.686	494.322	POS						1.26406	4.25565e-10	5.74996e-09	0.341739	-1.54903
528	9-methoxy-7-[4-[(2s,3r,4s,5s,6r)-3,4,5-trihydroxy-6-(hydroxymethyl)oxan-2-yl]oxyphenyl]-[1,3]dioxolo[4,5-g]chromen-8-one	347.418	497.104	POS			Shikimates and Phenylpropanoids	Isoflavonoids	Isoflavones	1.2655	1.73486e-11	4.42969e-10	0.245021	-2.02902
529	choerospondin	292.984	435.125	POS						1.26719	3.51107e-11	7.68641e-10	0.543271	-0.880255
530	1-hydroxy-4-[(2s,3r,4s,5s,6r)-3,4,5-trihydroxy-6-(hydroxymethyl)oxan-2-yl]oxynaphthalene-2-carboxylic acid	239.834	389.078	POS			Polyketides	Naphthalenes	Naphthoquinones	1.25191	2.27665e-09	2.26162e-08	0.462703	-1.11184
531	n6-isopentenyladenosine	261.73	394.17	NEG			Alkaloids	Pseudoalkaloids	Purine alkaloids	1.20276	9.55906e-06	2.75744e-05	0.742155	-0.430208
532	pseudoionone	396.506	193.157	POS	141-10-6		Terpenoids	Apocarotenoids	Apocarotenoids	1.19748	3.14795e-06	1.03671e-05	0.789007	-0.341891
533	apiosylskimmin	352.109	474.158	POS			Shikimates and Phenylpropanoids	Coumarins	Simple coumarins	1.27177	7.95435e-08	4.37693e-07	3.11902	1.64109
534	ginkgolide j	248.341	425.139	POS	107438-79-9	C07604	Terpenoids	Sesquiterpenoids	Picrotoxane sesquiterpenoids	1.18672	6.9799e-06	2.09046e-05	0.824903	-0.277703
535	pseudolaric acid c2	272.505	417.164	NEG						1.22982	2.16294e-07	1.02661e-06	0.791015	-0.338224
536	(2s)-5,3'-dihydroxy-4'-methoxy-6'',6''-dimethylpyrano[2'',3'':7,8]flavanone	400.482	369.13	POS			Shikimates and Phenylpropanoids	Flavonoids	Flavanones	1.26595	5.77808e-11	1.14858e-09	0.661903	-0.595309
537	mgdg(16:2/18:2)	609.394	768.557	POS						1.08354	1.96019e-05	5.20713e-05	2.52955	1.33888
538	chikusetsusaponin iva	420.158	817.428	POS			Terpenoids	Triterpenoids	Oleanane triterpenoids	1.05468	0.000990227	0.00181191	1.49286	0.578081
539	methyl 3-[7-methoxy-6-[(2~{s},3~{r},4~{s},5~{s},6~{r})-3,4,5-trihydroxy-6-(hydroxymethyl)oxan-2-yl]oxy-1-benzofuran-5-yl]propanoate	227.995	413.139	POS						1.21255	1.89294e-06	6.64891e-06	0.86646	-0.206795
540	(-)-beta-thujone	527.535	153.126	POS			Terpenoids	Monoterpenoids	Thujane monoterpenoids	1.18213	9.67262e-06	2.78584e-05	1.27566	0.351244
541	nardosinone	464.921	249.149	NEG			Terpenoids	Sesquiterpenoids	Nardosinane sesquiterpenoids	1.1108	0.000260335	0.000537353	0.661945	-0.595216
542	lpc(17:0)	530.455	568.361	NEG						1.26813	1.82889e-06	6.45738e-06	0.208073	-2.26484
543	lpc(15:1)	501.011	480.295	POS						1.26298	6.43759e-11	1.25075e-09	0.364372	-1.45652
544	s-adenosylhomocysteine	414.595	383.112	NEG		C00021	Carbohydrates	Nucleosides	Purine nucleosides	1.27364	1.49545e-10	2.45354e-09	0.0425592	-4.55439
545	acacetin-7-o-rutinoside	271.887	593.181	POS			Shikimates and Phenylpropanoids	Flavonoids	Flavones	1.07334	0.000596743	0.00113988	0.924351	-0.113487
546	5,7-dihydroxy-6,8-dimethoxyflavone	292.416	315.085	POS			Shikimates and Phenylpropanoids	Flavonoids	Flavones	1.26822	4.63327e-11	9.60498e-10	0.320921	-1.63971
547	geniposidic acid	129.065	373.113	NEG		C11673	Terpenoids	Monoterpenoids	Iridoids monoterpenoids	1.2705	1.45782e-07	7.34379e-07	2.98428	1.57738
548	(2s,3r,4s,5s,6r)-2-[4-[(3r,3as,6s,6ar)-3a-hydroxy-3-(4-hydroxy-3-methoxyphenyl)-3,4,6,6a-tetrahydro-1h-furo[3,4-c]furan-6-yl]-2-methoxyphenoxy]-6-(hydroxymethyl)oxane-3,4,5-triol	256.23	559.175	POS			Shikimates and Phenylpropanoids	Lignans	Furofuranoid lignans	1.25462	3.64888e-09	3.33608e-08	0.648321	-0.625219
549	sesamin	384.629	377.097	POS		C10882	Shikimates and Phenylpropanoids	Lignans	Furofuranoid lignans	1.16619	3.68824e-05	9.1916e-05	1.18788	0.248395
550	didymin	363.738	639.182	NEG			Shikimates and Phenylpropanoids	Flavonoids	Flavanones	1.2587	4.43872e-14	5.23484e-12	24.1142	4.59181
551	(1~{s},6~{s},13~{s})-13-hydroxy-16,17-dimethoxy-6-prop-1-en-2-yl-2,7,20-trioxapentacyclo[11.8.0.0^{3,11}.0^{4,8}.0^{14,19}]henicosa-3(11),4(8),9,14,16,18-hexaen-12-one	279.027	411.138	POS						1.25773	3.44071e-09	3.1811e-08	1.72843	0.789465
552	mgdg(18:2/18:3)	610.563	794.575	POS						1.24862	3.80446e-09	3.44922e-08	2.52491	1.33623
553	osajin	277.442	403.159	NEG		C10511	Shikimates and Phenylpropanoids	Isoflavonoids	Isoflavanones	1.2731	6.80567e-09	5.58473e-08	2.98016	1.57539
554	3,4-dihydroxyphenylglycol	234.256	193.048	POS		C05576	Shikimates and Phenylpropanoids	Tyrosine alkaloids	Phenylethylamines	1.2691	1.39002e-11	3.75227e-10	0.564765	-0.824277
555	pc(16:1e/21:2)	552.309	784.615	POS						1.17495	0.000904408	0.00166803	0.525256	-0.928908
556	schisandrin	447.562	415.208	POS						1.15454	2.45722e-05	6.3751e-05	0.779598	-0.359197
557	4-hydroxycordoin	364.113	325.142	POS			Shikimates and Phenylpropanoids	Flavonoids	Chalcones	1.274	4.84511e-09	4.1966e-08	12.1671	3.60492
558	cirsimarin	318.342	475.123	NEG			Shikimates and Phenylpropanoids	Flavonoids	Flavones	1.04539	0.00205398	0.00355135	0.597304	-0.743463
559	alloimperatorin	358.105	271.094	POS			Shikimates and Phenylpropanoids	Coumarins	Furocoumarins	1.26439	9.13423e-10	1.06749e-08	2.63303	1.39672
560	(2s,3r,4s,5r)-2-[(2r,3r,4s,5s,6r)-4,5-dihydroxy-6-(hydroxymethyl)-2-(2-phenylethoxy)oxan-3-yl]oxyoxane-3,4,5-triol	272.743	415.159	NEG			Shikimates and Phenylpropanoids	Phenylethanoids	Phenylethanoids	1.24996	3.42365e-08	2.14473e-07	0.831037	-0.267016
561	n-acetoxymethylflindersine	395.639	300.119	POS	149998-45-8		Alkaloids	Anthranilic acid alkaloids	Quinoline alkaloids	1.2036	3.73953e-08	2.30896e-07	222.896	7.80023
562	13-hpode	447.295	295.225	POS		C04717	Fatty acids	Octadecanoids	Other Octadecanoids	1.26994	1.97945e-07	9.50247e-07	0.152985	-2.70853
563	taxacin	455.843	817.316	POS			Terpenoids	Diterpenoids	Taxane diterpenoids	1.23126	0.000710629	0.00133696	14.6591	3.87372
564	syringaresnol-4-o-beta-d-apiofuranosy	385.273	735.23	POS			Shikimates and Phenylpropanoids	Lignans	Furofuranoid lignans	1.27051	3.03471e-08	1.93748e-07	1.84376	0.882653
565	cytisine	385.26	191.105	POS		C10763	Alkaloids	Lysine alkaloids	Pyridine alkaloids	1.16658	3.37953e-05	8.49339e-05	1.62462	0.700102
566	4-(4-hydroxyphenyl)-2-butanol	311.269	167.106	POS			Shikimates and Phenylpropanoids			1.26421	4.62098e-10	6.13009e-09	1.5293	0.61287
567	beta-peltatin	420.95	437.117	POS			Shikimates and Phenylpropanoids	Lignans	Arylnaphthalene and aryltetralin lignans	1.12296	1.5292e-07	7.64362e-07	0.0114195	-6.45235
568	benzofuran	326.143	119.049	POS	271-89-6	C14512	Shikimates and Phenylpropanoids	Coumarins	Furocoumarins	1.04507	9.62897e-05	0.000218411	1.85682	0.892834
569	tomatidine	446.036	416.353	POS		C10826	Alkaloids	Pseudoalkaloids	Steroidal alkaloids	1.26526	3.10694e-10	4.43654e-09	1.83274	0.874001
570	5,10-pentadecadienal	515.443	223.204	POS			Fatty acids	Fatty acyls	Fatty aldehydes	1.02252	0.00198352	0.00343736	0.868519	-0.203371
571	(4~{a}~{s},6~{a}~{s},6~{b}~{r},10~{s},12~{a}~{r})-10-hydroxy-2,2,6~{a},6~{b},9,9,12~{a}-heptamethyl-1,3,4,5,6,6~{a},7,8,8~{a},10,11,12,13,14~{b}-tetradecahydropicene-4~{a}-carboxylic acid	471.205	439.354	POS						1.04195	0.000504144	0.000979153	0.554267	-0.851347
572	celastrol	364.758	489.209	POS			Terpenoids	Triterpenoids	Friedelane triterpenoids	1.06669	0.000798624	0.00148782	1.26893	0.343615
573	n-acetyl-d-glucosamine	297.246	232.055	NEG		C00140	Carbohydrates			1.26334	9.58108e-06	2.76276e-05	2.70835	1.43742
574	5-hydroxy-4'-methoxy-6'',6''-dimethylpyrano[2'',3'':7,8]flavanone	430.12	353.136	POS			Shikimates and Phenylpropanoids	Flavonoids	Flavanones	1.27215	1.37625e-08	1.00638e-07	0.408333	-1.29218
575	4-methoxy-9-(2-methylbut-3-en-2-yl)furo[3,2-g]chromen-7-one	125.284	323.072	POS			Shikimates and Phenylpropanoids	Coumarins	Furocoumarins	1.26734	8.47497e-13	4.31365e-11	2.64879	1.40534
576	meloside a	221.047	593.154	NEG			Shikimates and Phenylpropanoids	Flavonoids	Flavones	1.17058	1.78897e-05	4.80273e-05	3.80069	1.92626
577	pmeoh(26:1/18:2)	551.785	823.613	NEG						1.17395	3.11008e-05	7.88125e-05	0.524765	-0.930256
578	rupestonic acid	441.426	231.136	POS						1.27292	4.20079e-09	3.74422e-08	1394.84	10.4459
579	3,7,11,15-tetramethyl-2e,6e,10e,14-hexadecatetraenal	520.842	289.251	POS			Fatty acids	Fatty acyls	Fatty aldehydes	1.13659	5.64377e-05	0.000134639	1.33281	0.414476
580	5-hydroxy-2-(4-hydroxyphenyl)-7-methoxy-4h-chromen-4-one	447.338	285.074	POS			Shikimates and Phenylpropanoids	Flavonoids	Flavones	1.27305	1.4605e-08	1.0572e-07	0.307495	-1.70136
581	gingerglycolipid a	507.226	677.368	POS	145937-22-0		Fatty acids	Glycerolipids	Glycosyldiacylglycerols	1.11909	0.00489998	0.00791159	0.670456	-0.576785
582	16-hydroxy hexadecanoic acid	536.474	271.227	NEG		C18218	Fatty acids	Fatty Acids and Conjugates	Hydroxy fatty acids	1.21657	0.000130241	0.000287155	0.631577	-0.662969
583	sinapic acid	238.294	207.064	POS		C00482	Shikimates and Phenylpropanoids	Phenylpropanoids	Cinnamic acids and derivatives	1.19331	1.11742e-07	5.84916e-07	0.313526	-1.67334
584	laricitrin	172.211	331.048	NEG		C12633	Shikimates and Phenylpropanoids	Flavonoids	Flavonols	1.26258	2.91128e-11	6.59738e-10	2.16261	1.11278
585	10-hydroxymorroniside	396.248	423.14	POS			Terpenoids	Monoterpenoids	Iridoids monoterpenoids	1.04213	0.000552099	0.00106231	0.701253	-0.511992
586	pongachalcone ii	447.348	353.136	POS			Shikimates and Phenylpropanoids	Flavonoids	Chalcones	1.27138	2.41699e-07	1.13069e-06	0.296752	-1.75267
587	isomaltose	392.753	343.152	POS		C05400	Carbohydrates	Saccharides	Disaccharides	1.24256	2.95191e-08	1.89407e-07	0.45602	-1.13283
588	(-)-maackiain-3-o-glucosyl-6''-o-malonate	100.837	550.16	POS		C16231	Shikimates and Phenylpropanoids	Isoflavonoids	Pterocarpan	1.27253	0.000596803	0.00113989	899.317	9.81269
589	(2s,3r,4s)-4-hydroxyisoleucine	45.6611	148.096	POS						1.25226	1.25109e-09	1.37606e-08	2.15433	1.10724
590	dihydrocarvone	432.185	153.127	POS	7764-50-3	C18018	Terpenoids	Monoterpenoids	Menthane monoterpenoids	1.27241	2.0918e-08	1.42335e-07	0.295305	-1.75972
591	gallocatechin	75.1933	305.068	NEG		C12136	Shikimates and Phenylpropanoids	Flavonoids	Flavan-3-ols	1.24583	4.56155e-09	3.99907e-08	1.90913	0.932914
592	6''-o-acetyldaidzin	424.822	459.137	POS	71385-83-6		Shikimates and Phenylpropanoids	Isoflavonoids	Isoflavones	1.24069	2.2861e-09	2.26868e-08	0.256659	-1.96207
593	1-phenylethyl formate	441.426	151.075	POS	7775-38-4		Alkaloids			1.18231	1.43652e-05	3.95283e-05	4.89322	2.29078
594	pseudo-anisatin	309.447	321.129	POS			Terpenoids	Sesquiterpenoids	Prezizaane sesquiterpenoids	1.15803	3.16601e-05	8.00953e-05	0.748119	-0.41866
595	dgts(16:0/18:4)	613.163	732.578	POS						1.03948	0.00159871	0.00281962	1.43322	0.51926
596	ovalitenin b	161.667	309.118	NEG			Shikimates and Phenylpropanoids	Flavonoids	Chalcones	1.21497	1.0882e-06	4.106e-06	1.65221	0.724395
597	echinopsine	206.323	160.075	POS			Alkaloids	Tryptophan alkaloids	Quinoline alkaloids	1.27115	1.79261e-13	1.3471e-11	6.94349	2.79566
598	sec-o-glucosylhamaudol	286.707	437.144	NEG			Polyketides	Chromanes	Chromones	1.18332	1.46697e-05	4.02916e-05	0.499178	-1.00237
599	biochanin a	310.474	283.064	NEG		C00814	Shikimates and Phenylpropanoids	Isoflavonoids	Isoflavones	1.22706	5.67266e-07	2.34515e-06	0.799498	-0.322834
600	3,5-dihydroxy-6,7,8-trimethoxyflavone	294.986	345.094	POS			Shikimates and Phenylpropanoids	Flavonoids	Flavonols	1.26159	7.22886e-10	8.83241e-09	0.534598	-0.903475
601	sinensetin	41.2223	371.118	NEG		C10186	Shikimates and Phenylpropanoids	Flavonoids	Flavones	1.22057	0.00014308	0.000312751	0.537236	-0.896372
602	dgts(14:0/18:2)	629.309	708.574	POS						1.2691	2.30292e-11	5.51261e-10	0.448692	-1.1562
603	(10)-gingerol	511.421	395.241	NEG	23513-15-7	C17496	Polyketides			1.22871	1.01974e-06	3.88256e-06	1.33315	0.414836
604	licorice glycoside a	363.986	727.231	POS			Shikimates and Phenylpropanoids	Flavonoids	Chalcones	1.05483	3.79183e-06	1.22243e-05	8.59675	3.10379
605	2-[(2r)-9-hydroxy-7-oxo-2,3-dihydro-7h-furo[3,2-g]chromen-2-yl]propan-2-yl |a-d-glucopyranoside	267.712	463.097	POS			Shikimates and Phenylpropanoids	Coumarins	Furocoumarins	1.23789	1.78934e-06	6.33449e-06	0.444963	-1.16824
606	beta-cryptoxanthin	562.696	552.425	POS		C08591	Terpenoids	Carotenoids (C40)	Carotenoids (C40)	1.13441	1.7038e-05	4.6038e-05	16.0115	4.00104
607	l-cysteine	102.716	120.012	NEG		C00097	Amino acids and Peptides	Small peptides	Aminoacids	1.26699	7.22067e-11	1.36853e-09	0.451947	-1.14577
608	mollugin	28.2412	285.115	POS			Polyketides	Naphthalenes	Naphthalenes and derivatives	1.03951	0.00208607	0.00360103	0.723326	-0.467282
609	a-asarone	287.721	209.116	POS	2883-98-9	C17846	Shikimates and Phenylpropanoids			1.19531	1.12942e-06	4.23633e-06	2.54113	1.34547
610	tephrowatsin b	120.318	337.186	POS			Shikimates and Phenylpropanoids			1.27147	1.59698e-07	7.92343e-07	9.65071	3.27063
611	cyanidin 3-(6''-malonylglucoside)	292.367	536.106	POS	94977-38-5		Others	Others	Others	1.10053	2.05457e-05	5.42986e-05	9.11413	3.1881
612	5-undecylbenzene-1,3-diol	523.161	263.201	NEG			Polyketides	Aromatic polyketides	Catechols	1.24838	4.5123e-08	2.71039e-07	0.649675	-0.622209
613	fisetin	234.16	309.038	POS		C10041	Shikimates and Phenylpropanoids	Flavonoids	Flavonols	1.2176	0.000167139	0.000360032	1.3503	0.433283
614	2-oxo-nonadecanoic acid	615.321	313.272	POS			Fatty acids	Fatty Acids and Conjugates	Oxo fatty acids	1.24563	5.52853e-08	3.22083e-07	0.634872	-0.655461
615	rosmadial	269.065	345.167	POS	85514-31-4		Terpenoids	Diterpenoids	Secoabietane diterpenoids	1.22806	7.98359e-05	0.000184497	0.666663	-0.584971
616	pc(14:0e/4:0)	545.429	524.369	POS						1.27126	1.20801e-13	1.02253e-11	0.220831	-2.17899
617	glucosylisomaltol	270.362	289.09	POS	85559-61-1		Polyketides			1.07561	0.000605371	0.001155	0.840915	-0.249969
618	avenanthramide g	241.816	300.09	POS			Shikimates and Phenylpropanoids			1.26281	4.38259e-10	5.89061e-09	0.518564	-0.947406
619	gluconic acid	55.122	195.05	NEG		C00257	Carbohydrates	Saccharides	Monosaccharides	1.03474	0.00155298	0.00274461	0.786742	-0.346037
620	2-(3,4-dimethoxyphenoxy)-6-[(3,4,5-trihydroxyoxan-2-yl)oxymethyl]oxane-3,4,5-triol	277.717	466.189	POS						1.27269	8.54932e-09	6.7589e-08	2.80874	1.48992
621	digoxigenin	312.191	413.225	POS			Terpenoids	Steroids	Cardenolides	1.25863	7.79186e-06	2.3035e-05	4.27168	2.0948
622	linoleic acid; lc-tdda; ce30	534.816	279.232	NEG			Fatty acids	Fatty Acids and Conjugates	Unsaturated fatty acids	1.19149	1.25946e-06	4.65859e-06	0.267017	-1.905
623	linalool (+)	511.229	153.128	NEG			Terpenoids	Monoterpenoids	Acyclic monoterpenoids	1.12482	2.93284e-05	7.46782e-05	0.722723	-0.468486
624	viburtinal	385.846	161.059	POS	63661-79-0		Terpenoids	Monoterpenoids	Iridoids monoterpenoids	1.25748	1.25336e-09	1.37738e-08	1.6082	0.685443
625	(2s,3r,4r,5r,6s)-2-[(2r,3r,4s,5r,6r)-2-[2-(3,4-dihydroxyphenyl)ethoxy]-3,5-dihydroxy-6-(hydroxymethyl)oxan-4-yl]oxy-6-methyloxane-3,4,5-triol	293.683	501.192	POS			Shikimates and Phenylpropanoids	Phenylethanoids	Phenylethanoids	1.27062	3.37442e-08	2.11869e-07	2.80419	1.48758
626	(2r,3r)-3,5-dihydroxy-2-(4-hydroxyphenyl)-8-(3-methylbut-2-en-1-yl)-7-(((2s,3r,4s,5s,6r)-3,4,5-trihydroxy-6-(hydroxymethyl)tetrahydro-2h-pyran-2-yl)oxy)chroman-4-one	269.713	519.182	POS			Shikimates and Phenylpropanoids	Flavonoids	Dihydroflavonols	1.26668	4.1931e-11	8.85381e-10	1.35503	0.438322
627	3-methylbutanamine	643.869	88.1117	POS	107-85-7	C02640				1.03946	0.00079192	0.00147588	0.854707	-0.226497
628	6''-acetylapiin	246.94	607.175	POS		C04858	Shikimates and Phenylpropanoids	Flavonoids	Flavones	1.09476	0.00069281	0.00130649	0.714666	-0.48466
629	5,6,2',3',6'-pentamethoxyflavone	316.675	373.127	POS			Shikimates and Phenylpropanoids	Flavonoids	Flavones	1.19728	1.04302e-06	3.95832e-06	2.30563	1.20516
630	euphol acetate	512.773	469.389	POS			Terpenoids	Triterpenoids	Lanostane, Tirucallane and Euphane triterpenoids	1.21142	5.45816e-06	1.68278e-05	0.582629	-0.77935
631	mgdg(16:2/18:3)	595.985	766.542	POS						1.26934	9.95823e-07	3.80459e-06	7.31495	2.87085
632	podophyllotoxone	377.109	411.105	NEG			Shikimates and Phenylpropanoids	Lignans	Arylnaphthalene and aryltetralin lignans	1.25995	6.92201e-12	2.17165e-10	0.273327	-1.8713
633	raspberry ketone glucoside	339.084	385.149	NEG						1.27298	1.0555e-09	1.20257e-08	2.04485	1.032
634	[(3~{r},3~{a}~{s},6~{s},6~{a}~{r})-6-(4-hydroxy-3-methoxyphenyl)-3-[3-methoxy-4-[(2~{s},3~{r},4~{s},5~{s},6~{r})-3,4,5-trihydroxy-6-(hydroxymethyl)oxan-2-yl]oxyphenyl]-3,4,6,6~{a}-tetrahydro-1~{h}-furo[3,4-c]furan-3~{a}-yl] acetate	221.95	623.196	NEG						1.2461	9.61453e-12	2.82222e-10	6.12544	2.61481
635	dgts(18:2/18:2)	629.403	760.605	POS						1.23029	1.07226e-07	5.64255e-07	0.577818	-0.791313
636	schisandrin b	405.122	418.22	POS			Shikimates and Phenylpropanoids	Lignans	Dibenzocyclooctadienes lignans	1.07008	0.000646867	0.00122733	0.940165	-0.0890137
637	3-(2,4-dihydroxyphenyl)-7-hydroxy-6,8-bis(3-methylbut-2-enyl)-2,3-dihydrochromen-4-one	264.872	431.183	POS			Shikimates and Phenylpropanoids	Isoflavonoids	Isoflavanones	1.20734	2.40606e-06	8.18588e-06	0.75176	-0.411656
638	[(2~{r},3~{r},4~{s},5~{r},6~{s})-3-hydroxy-2-(hydroxymethyl)-5,6-bis[(3,4,5-trihydroxybenzoyl)oxy]oxan-4-yl] 3,4,5-trihydroxybenzoate	318.266	637.112	POS						1.27049	1.13321e-14	2.07765e-12	6.69936	2.74402
639	7,8-dihydroxycoumarin	448.683	179.033	POS			Shikimates and Phenylpropanoids	Coumarins	Simple coumarins	1.23016	6.31626e-07	2.57245e-06	0.742378	-0.429773
640	2-amino-3-prop-2-enylsulfinylpropanoic acid	238.283	176.039	NEG			Others	Others	Others	1.26694	2.33881e-11	5.57439e-10	1.47302	0.558775
641	(2s,3r,4s,5s,6r)-2-[3-hydroxy-5-[(z)-2-(4-hydroxyphenyl)ethenyl]phenoxy]-6-(hydroxymethyl)oxane-3,4,5-triol	199.359	389.121	NEG			Shikimates and Phenylpropanoids	Stilbenoids	Monomeric stilbenes	1.10945	0.000231204	0.00048258	0.735646	-0.442916
642	isocrotonic acid	55.8377	87.0437	POS	503-64-0		Fatty acids	Fatty Acids and Conjugates	Unsaturated fatty acids	1.27402	2.86644e-05	7.31801e-05	5.22108e-05	-14.2253
643	indole-3-carbinol	206.312	130.064	POS			Alkaloids	Tryptophan alkaloids	Simple indole alkaloids	1.27406	3.94643e-06	1.26594e-05	1160.18	10.1801
644	bmp(7:0/14:1)	401.129	584.339	POS						1.26908	9.68212e-12	2.83665e-10	2.25865	1.17546
645	quercitrin	414.6	447.102	NEG		C01750	Shikimates and Phenylpropanoids	Flavonoids	Flavonols	1.23791	4.22993e-07	1.82537e-06	2.44695	1.29098
646	aucubin	231.808	347.129	POS		C09771	Terpenoids	Monoterpenoids	Iridoids monoterpenoids	1.26639	6.95682e-11	1.33026e-09	1.73775	0.79722
647	myricitrin	310.811	463.087	NEG		C10108	Shikimates and Phenylpropanoids	Flavonoids	Flavonols	1.22335	5.20945e-05	0.00012533	1.7888	0.838993
648	2,6-dimethyl-5-heptenal	527.536	141.127	POS			Fatty acids	Fatty acyls	Fatty aldehydes	1.04934	0.00170086	0.00298386	1.39411	0.47934
649	5-[3,4,5-trihydroxy-6-(hydroxymethyl)oxan-2-yl]oxy-9-(3,4,5-trimethoxyphenyl)-5~{a},6,8~{a},9-tetrahydro-5~{h}-[2]benzofuro[6,5-f][1,3]benzodioxol-8-one	42.5322	594.219	POS						1.26635	1.82521e-13	1.36302e-11	0.0956879	-3.38552
650	1-naphthol	228.49	145.064	POS		C11714	Polyketides	Naphthalenes	Naphthalenes and derivatives	1.16094	3.03984e-06	1.00616e-05	2.22982	1.15693
651	(e,e)-piperlonguminine; aif; ce30; ms2dec	245.803	274.145	POS			Shikimates and Phenylpropanoids			1.26137	2.06534e-05	5.45338e-05	3.00986	1.5897
652	cyanidin	234.486	285.043	NEG		C05905	Alkaloids	Tyrosine alkaloids	Aporphine alkaloids	1.26945	1.163e-11	3.27664e-10	1.60438	0.682015
653	dgts(16:0/18:3)	633.46	734.592	POS						1.25594	5.37389e-09	4.59197e-08	0.612569	-0.707056
654	chrysanthemic acid	474.345	186.148	POS		C09842	Terpenoids	Monoterpenoids	Irregular monoterpenoids	1.22409	1.57371e-07	7.83472e-07	2.14649	1.10198
655	oxypeucedanin	380.635	287.089	POS		C09282	Shikimates and Phenylpropanoids	Coumarins	Furocoumarins	1.26661	1.50243e-10	2.46265e-09	0.509789	-0.972028
656	kanzonol e	255.056	389.176	POS			Shikimates and Phenylpropanoids	Flavonoids	Flavones	1.26167	1.27342e-09	1.39586e-08	2.41831	1.274
657	methylophiopogonanone b	414.613	327.123	NEG			Shikimates and Phenylpropanoids	Isoflavonoids	Isoflavanones	1.25022	1.90682e-08	1.31976e-07	0.792054	-0.336329
658	4''-o-acetylmyricitrin	286.397	507.114	POS			Shikimates and Phenylpropanoids	Flavonoids	Flavonols	1.22167	2.97756e-06	9.88423e-06	0.625489	-0.676944
659	citreorosein	285.731	287.053	POS		C17810	Polyketides	Polycyclic aromatic polyketides	Anthraquinones and anthrones	1.23283	1.08649e-07	5.70963e-07	1.54598	0.628523
660	p-methoxycinnamic acid ethyl ester	295.324	207.1	POS			Shikimates and Phenylpropanoids	Phenylpropanoids	Cinnamic acids and derivatives	1.10032	0.000670468	0.00126806	1.3043	0.38328
661	xanthumin	395.822	307.152	POS			Terpenoids	Sesquiterpenoids	Germacrane sesquiterpenoids	1.26279	1.30485e-10	2.19841e-09	2.19739	1.13579
662	fastigilin b	347.286	361.164	NEG			Terpenoids	Sesquiterpenoids	Pseudoguaiane sesquiterpenoids	1.15463	0.000947105	0.00173972	1.32021	0.400766
663	flossonol	289.716	221.116	POS			Polyketides	Naphthalenes	Naphthoquinones	1.18719	2.99711e-07	1.36077e-06	2.62171	1.39051
664	erythro-(7r,8s)-dadahol b	399.879	667.216	NEG			Shikimates and Phenylpropanoids	Phenylpropanoids	Cinnamic acids and derivatives	1.27003	2.35824e-12	9.46306e-11	0.537683	-0.895173
665	8-(2,3-dihydroxy-3-methylbutyl)-7-methoxychromen-2-one	352.588	277.108	NEG			Shikimates and Phenylpropanoids	Coumarins	Simple coumarins	1.12964	0.0241182	0.0345927	2.80038	1.48562
666	lpi(18:2)	644.259	595.287	NEG						1.23439	5.22909e-07	2.18938e-06	0.662692	-0.593589
667	neoxanthin	517.951	600.413	POS		C08606	Terpenoids	Carotenoids (C40)	Carotenoids (C40)	1.18936	5.05658e-06	1.57174e-05	1.37545	0.459902
668	guanosine 5'-diphospho-d-mannose	66.8179	604.07	NEG			Carbohydrates	Nucleosides	Purine nucleotides	1.23698	7.7575e-07	3.07368e-06	0.489369	-1.031
669	14-(hydroxymethyl)-5,9-dimethyltetracyclo[11.2.1.0,.0,hexadecane-5-carbaldehyde	547.111	303.233	NEG						1.26844	8.24999e-07	3.23848e-06	0.265551	-1.91294
670	lps(18:2)	646.038	520.265	NEG						1.21729	1.40014e-06	5.11683e-06	0.838435	-0.254229
671	n-cyclohexylformamide	527.535	128.106	POS			Others	Others	Others	1.19678	1.172e-05	3.30249e-05	1.31253	0.392351
672	thiiraneacetonitrile	34.6698	100.024	POS	58130-93-1		Alkaloids	Small peptides	Aminoacids	1.13897	5.47157e-05	0.00013087	0.842551	-0.247164
673	scorzoside	256.142	411.196	POS	106009-45-4		Terpenoids	Sesquiterpenoids	Guaiane sesquiterpenoids	1.27046	4.61291e-13	2.72429e-11	1.83025	0.872041
674	pc(16:2e/4:0)	524.181	548.368	POS						1.2519	1.64904e-08	1.1683e-07	0.564176	-0.825782
675	khelloside	387.236	409.102	POS			Polyketides	Chromanes	Chromones	1.26949	3.06291e-12	1.15818e-10	0.606368	-0.721734
676	prosopinine	436.163	288.252	POS			Alkaloids	Lysine alkaloids	Piperidine alkaloids	1.2292	2.96712e-07	1.34889e-06	1.19861	0.261358
677	oleuropein	280.202	539.177	NEG			Terpenoids	Monoterpenoids	Secoiridoid monoterpenoids	1.16312	0.000205898	0.000434265	1.57258	0.653132
678	heptanoic acid	424.142	187.111	POS		C17714	Fatty acids	Fatty Acids and Conjugates	Branched fatty acids	1.27269	2.10584e-09	2.11695e-08	0.508995	-0.974276
679	alpha-viniferin	284.411	679.181	POS			Shikimates and Phenylpropanoids	Stilbenoids	Oligomeric stibenes	1.09591	0.0004021	0.000797459	0.860896	-0.21609
680	sagittatoside a	423.863	675.221	NEG			Shikimates and Phenylpropanoids	Flavonoids	Flavonols	1.14207	7.96898e-05	0.000184192	0.737656	-0.43898
681	(e)-2,6-dimethyl-2,5-heptadienoic acid	509.43	155.106	POS	261949-42-2		Fatty acids	Fatty Acids and Conjugates	Branched fatty acids	1.24313	2.75704e-09	2.64642e-08	2.06177	1.04389
682	neoraunone	307.516	325.111	POS			Shikimates and Phenylpropanoids	Isoflavonoids	Isoflavanones	1.18152	2.76608e-06	9.25688e-06	2.09122	1.06434
683	methyl rosmarinate	311.081	391.103	NEG			Shikimates and Phenylpropanoids	Phenylpropanoids	Cinnamic acids and derivatives	1.25235	1.22294e-05	3.42903e-05	1.44508	0.531147
684	lpe(20:1)	551.103	508.337	POS						1.19206	0.000523438	0.00101276	0.147956	-2.75676
685	allocryptopine	262.421	352.161	POS			Alkaloids	Tyrosine alkaloids	Isoquinoline alkaloids	1.24021	4.25868e-06	1.35253e-05	0.527135	-0.923757
686	alpha-d-xylopyranosyl-(1->6)-beta-d-glucopyranosyl-(1->4)-d-glucose	43.8608	475.173	POS	69637-98-5		Carbohydrates	Saccharides	Disaccharides	1.26458	3.93004e-06	1.26152e-05	2.63337	1.39691
687	caffeic acid hexoside	225.955	341.086	NEG			Shikimates and Phenylpropanoids	Phenylpropanoids	Cinnamic acids and derivatives	1.16246	3.38786e-05	8.51323e-05	0.923333	-0.115077
688	mgdg(18:3/18:3)	597.293	792.556	POS						1.24823	3.54181e-05	8.85808e-05	2.27988	1.18896
689	h-glu(ala-oh)-oh	45.0694	219.096	POS						1.25368	4.45442e-05	0.000108871	0.329531	-1.60151
690	lophocerine	396.371	250.176	POS			Alkaloids	Tyrosine alkaloids	Tetrahydroisoquinoline alkaloids	1.18171	8.23542e-06	2.41965e-05	0.717527	-0.478896
691	13,21-dihydroeurycomanone	245.788	411.16	POS						1.24879	0.000489925	0.000954028	6.89218	2.78496
692	5-(3-buten-1-ynyl)-2,2'-bithiophene	361.472	217.011	POS			Fatty acids	Fatty acyls	Fatty alcohols	1.27171	1.05243e-08	8.02666e-08	0.12264	-3.02749
693	12-dihydrodalbinol o-glucoside	260.428	591.201	POS			Shikimates and Phenylpropanoids	Isoflavonoids	Rotenoids	1.2437	0.000180964	0.000386561	0.431717	-1.21184
694	l-tryptophan	206.323	227.077	POS		C00078	Amino acids and Peptides	Small peptides	Aminoacids	1.27362	3.90369e-08	2.39199e-07	5.90403	2.5617
695	rottlerin	416.697	517.183	POS		C10721	Polyketides	Phloroglucinols	Chalcones	1.22506	2.4533e-05	6.36621e-05	1.69537	0.761602
696	12:4+3o fatty acyl hexoside	250.877	387.165	NEG			Fatty acids	Fatty acyl glycosides	Fatty acyl glycosides	1.24573	1.46183e-10	2.40834e-09	3.30984	1.72676
697	irigenin	265.77	361.087	POS		C17957	Shikimates and Phenylpropanoids	Isoflavonoids	Isoflavones	1.24948	7.01843e-08	3.93515e-07	0.449334	-1.15414
698	cis-jasmone	490.389	165.126	POS	488-10-8	C08490	Fatty acids	Octadecanoids	Jasmonic acids	1.26739	1.89985e-11	4.74448e-10	2.51011	1.32775
699	rhamnocitrin	364.819	301.069	POS		C17059	Shikimates and Phenylpropanoids	Flavonoids	Flavonols	1.27056	1.74784e-12	7.57131e-11	0.430013	-1.21755
700	kikkanol a	490.454	255.194	POS			Terpenoids	Sesquiterpenoids	Eudesmane sesquiterpenoids	1.20767	4.59629e-06	1.44537e-05	2.77065	1.47022
701	methyl 18-hydroxy-1,3,11,12,14,15,16,17,18,19,20,21-dodecahydroyohimban-19-carboxylate	94.8799	337.185	POS						1.26357	0.000206542	0.0004355	13.7634	3.78277
702	3-prenyl-4-hydroxyacetophenone	405.928	203.107	NEG	26932-05-8		Others	Others	Others	1.27118	1.07212e-08	8.14949e-08	2.54744	1.34905
703	bilobol	591.311	341.245	POS		C10770	Polyketides	Aromatic polyketides	Catechols	1.19162	2.7229e-06	9.12658e-06	4.95027	2.30751
704	icariin	414.411	677.23	POS			Shikimates and Phenylpropanoids	Flavonoids	Flavonols	1.27196	3.08379e-14	4.0632e-12	4.39404	2.13555
705	4-(1,3-benzodioxol-5-ylmethyl)-3-[(3,4-dimethoxyphenyl)methyl]oxolan-2-one	405.066	393.128	POS						1.26828	1.73738e-11	4.43319e-10	0.521384	-0.939581
706	confluentic acid	328.117	539.21	POS			Polyketides	Aromatic polyketides	Depsides	1.26896	3.29141e-08	2.07432e-07	0.0364636	-4.7774
707	macluroxanthone	439.726	393.13	NEG			Shikimates and Phenylpropanoids	Xanthones	Plant xanthones	1.15391	1.0497e-07	5.5495e-07	42.067	5.39462
708	monepalin b	250.729	759.166	POS			Shikimates and Phenylpropanoids	Flavonoids	Flavonols	1.26556	1.40223e-10	2.33602e-09	0.251258	-1.99276
709	purpurascenin	273.899	463.144	POS			Shikimates and Phenylpropanoids	Flavonoids	Flavonols	1.25568	6.61997e-10	8.21296e-09	0.139763	-2.83894
710	pa(2:0/16:1)	487.423	449.231	NEG						1.17187	3.58612e-08	2.22954e-07	3.79119	1.92265
711	apiole	428.278	223.095	POS	523-80-8	C10429	Shikimates and Phenylpropanoids	Phenylpropanoids	Cinnamic acids and derivatives	1.27346	2.54863e-08	1.67639e-07	0.0988952	-3.33796
712	nystose	43.9714	689.206	POS	13133-07-8		Carbohydrates	Saccharides	Polysaccharides	1.27166	2.00962e-07	9.62583e-07	0.171367	-2.54484
713	[6]-gingerol	431.13	293.175	NEG		C10462	Others	Others	Others	1.17722	1.25185e-05	3.49969e-05	1.27463	0.350074
714	3-hydroxy-beta-ionone	460.577	209.152	POS			Terpenoids	Apocarotenoids	Apocarotenoids	1.14458	5.80891e-05	0.000138272	0.857412	-0.22194
715	methyl 3-(3-methylbut-2-enyl)-1,4-bis[[3,4,5-trihydroxy-6-(hydroxymethyl)oxan-2-yl]oxy]naphthalene-2-carboxylate	207.325	655.225	NEG			Polyketides	Naphthalenes	Naphthoquinones	1.2404	3.76166e-08	2.31966e-07	249.665	7.96385
716	dgdg(18:2/18:2)	613.183	958.643	POS						1.02059	0.00209414	0.00361286	0.747771	-0.419331
717	jasminine	205.589	221.09	POS			Alkaloids	Nicotinic acid alkaloids	Pyridine alkaloids	1.26362	3.32843e-08	2.09458e-07	24.1108	4.59161
718	1-[2,4,6-trihydroxy-3-[7-hydroxy-2-(4-hydroxyphenyl)-3,4-dihydro-2h-chromen-4-yl]phenyl]dodecan-1-one	562.394	547.333	NEG			Shikimates and Phenylpropanoids	Flavonoids	Flavan-3-ols	1.1775	4.99035e-11	1.02068e-09	0.0371007	-4.75241
719	faratroside	267.701	815.23	POS			Shikimates and Phenylpropanoids	Flavonoids	Flavonols	1.00884	0.00205868	0.00355852	0.88847	-0.170606
720	tamarixetin 7-glucoside	229.746	479.113	POS			Shikimates and Phenylpropanoids	Flavonoids	Flavonols	1.2726	2.95074e-09	2.79655e-08	0.142106	-2.81496
721	4-[5-(3,4-dimethoxyphenyl)-3,4-dimethyloxolan-2-yl]-2-methoxyphenol	326.734	341.172	POS						1.27205	4.43102e-08	2.66862e-07	4.22512	2.07899
722	pumiloside	279.8	513.19	POS		C16723	Alkaloids	Tryptophan alkaloids	Pyrroloquinoline alkaloids	1.27236	8.7852e-14	8.14959e-12	0.298561	-1.7439
723	ciceritol	279.734	519.196	POS	88167-26-4		Carbohydrates	Saccharides	Polysaccharides	1.25194	1.36176e-09	1.47762e-08	2.43351	1.28304
724	brassicin	376.139	477.113	NEG						1.22881	1.4695e-06	5.33253e-06	0.496925	-1.0089
725	epiyangambin	404.613	445.186	NEG			Shikimates and Phenylpropanoids	Lignans	Furofuranoid lignans	1.26105	4.44626e-10	5.95963e-09	1.2624	0.336165
726	lansiumarin b	390.557	371.146	POS	205115-74-8		Shikimates and Phenylpropanoids	Coumarins	Furocoumarins	1.27096	2.58813e-12	1.01128e-10	0.608464	-0.716756
727	4-methoxyglucobrassicin	249.128	479.076	POS			Amino acids and Peptides	Amino acid glycosides	Glucosinolates	1.26502	5.63853e-07	2.33303e-06	0.371132	-1.43
728	methylophiopogonanone a	384.575	341.101	NEG			Shikimates and Phenylpropanoids			1.26598	1.23758e-10	2.10802e-09	1.51185	0.596319
729	andrachcinidine	396.318	228.194	POS			Alkaloids	Lysine alkaloids	Piperidine alkaloids	1.1469	5.29058e-05	0.000126995	0.770228	-0.376643
730	physalin b	221.169	511.2	POS			Terpenoids	Steroids	Ergostane steroids	1.27113	3.24588e-09	3.02701e-08	24.5651	4.61854
731	isoformononetin	424.142	269.079	POS	486-63-5	C12125	Shikimates and Phenylpropanoids	Isoflavonoids	Isoflavones	1.27267	1.94578e-08	1.34001e-07	0.497028	-1.0086
732	kaempferol-3-o-arabinoside	238.504	417.085	NEG			Shikimates and Phenylpropanoids	Flavonoids	Flavonols	1.18071	1.42793e-05	3.93227e-05	1.41658	0.502417
733	mls001066334-01!d-erythro-dihydrosphingosine764-22-7	409.428	302.303	POS			Fatty acids	Spingolipids	Sphingoid bases	1.23619	1.74429e-05	4.70009e-05	0.780778	-0.357015
734	dgts(15:1/18:2)	622.499	720.577	POS						1.22517	1.56617e-06	5.63637e-06	0.599382	-0.738453
735	5-isopropyl-2-methylphenol acetate	489.821	193.121	POS	6380-28-5		Terpenoids	Monoterpenoids	Menthane monoterpenoids	1.152	2.27629e-05	5.95401e-05	2.71987	1.44354
736	(2~{s},3~{r},4~{s},5~{s},6~{r})-2-[(2~{r},3~{r},4~{s},5~{s},6~{r})-4,5-dihydroxy-2-phenylmethoxy-6-[[(2~{s},3~{r},4~{s},5~{r})-3,4,5-trihydroxyoxan-2-yl]oxymethyl]oxan-3-yl]oxy-6-(hydroxymethyl)oxane-3,4,5-triol	443.368	582.244	POS						1.16038	0.000124222	0.000275058	2.01938	1.01391
737	arctigenin	400.404	395.147	POS		C10545	Shikimates and Phenylpropanoids	Lignans	Dibenzylbutyrolactone lignans	1.25295	8.61515e-06	2.51788e-05	4.68658	2.22853
738	daidzein 7-o-glucoside-4'-o-apioside	231.239	549.155	POS			Shikimates and Phenylpropanoids	Isoflavonoids	Isoflavones	1.25816	8.51825e-09	6.7371e-08	2.17137	1.11861
739	(2r,3s,4s,5r,6r)-5-[(2s,3r,4r)-3,4-dihydroxy-4-(hydroxymethyl)oxolan-2-yl]oxy-2-(hydroxymethyl)-6-[2-(4-hydroxyphenyl)ethoxy]oxane-3,4-diol	320.553	431.155	NEG			Shikimates and Phenylpropanoids	Phenylethanoids	Phenylethanoids	1.26976	1.60162e-13	1.25591e-11	4.55904	2.18873
740	3,5,8-trimethoxy-3',4'-methylenedioxy-7-prenyloxyflavone	377.394	441.149	POS			Shikimates and Phenylpropanoids	Flavonoids	Flavonols	1.2632	6.1047e-12	1.97945e-10	0.199374	-2.32645
741	silybin	80.4557	481.116	NEG		C07610	Shikimates and Phenylpropanoids	Lignans	Flavonolignans	1.26401	6.21825e-06	1.88541e-05	0.10567	-3.24237
742	zingerone	326.924	193.087	NEG		C17497	Others	Others	Others	1.1609	5.29453e-05	0.000127052	0.282984	-1.82121
743	noreugenin	283.082	193.048	POS						1.23712	5.61882e-09	4.7592e-08	2.14246	1.09927
744	tilianin	329.116	491.118	NEG						1.21388	1.15621e-06	4.3234e-06	0.852655	-0.229966
745	(2~{s},3~{r},4~{s},5~{s},6~{r})-2-[(3~{r})-3,7-dimethylocta-1,6-dien-3-yl]oxy-6-[[(2~{s},3~{r},4~{s},5~{s})-3,4,5-trihydroxyoxan-2-yl]oxymethyl]oxane-3,4,5-triol	357.439	471.217	POS						1.24564	1.8543e-08	1.29104e-07	0.649595	-0.622388
746	calomelanol a	460.523	419.144	POS			Shikimates and Phenylpropanoids	Flavonoids	Neoflavonoids	1.27406	1.6829e-09	1.75993e-08	0.0823795	-3.60157
747	5,7-dihydroxy-3-[(2s,3r,4s,5r,6r)-3,4,5-trihydroxy-6-(hydroxymethyl)oxan-2-yl]oxy-2-(3,4,5-trihydroxyphenyl)chromen-4-one	289.031	519.051	POS			Shikimates and Phenylpropanoids	Flavonoids	Flavonols	1.27171	2.21441e-08	1.49104e-07	0.360117	-1.47346
748	[3,4-dihydroxy-4-(7-methoxy-2-oxochromen-8-yl)-2-methylidenebutyl] 3-methylbutanoate	246.864	359.147	POS						1.14364	8.97731e-05	0.000205036	1.09843	0.135443
749	4-methylene-l-glutamine	41.87	159.075	POS		C01109	Amino acids and Peptides	Small peptides	Aminoacids	1.26889	6.18013e-06	1.87488e-05	4.85705	2.28008
750	9-stearolic acid	646.224	279.232	NEG			Fatty acids	Fatty acyls	Hydrocarbons	1.23684	5.31193e-07	2.21687e-06	0.482918	-1.05015
751	8-[4,5-dihydroxy-6-(hydroxymethyl)-3-(3,4,5-trihydroxy-6-methyloxan-2-yl)oxyoxan-2-yl]-5,7-dihydroxy-2-(4-methoxyphenyl)chromen-4-one	217.818	591.155	NEG						1.26383	1.14466e-11	3.23203e-10	0.471413	-1.08494
752	estrone	309.563	271.163	POS		C00468	Terpenoids	Steroids	Estrane steroids	1.21328	4.41029e-07	1.88825e-06	122.453	6.93609
753	glucovanillin	98.839	359.097	NEG	494-08-6		Shikimates and Phenylpropanoids	Phenolic acids	Simple phenolic acids	1.17542	7.57408e-06	2.24547e-05	1.60825	0.685488
754	5'-deoxy-5'-(methylsulfinyl)adenosine	139.025	314.09	POS						1.27215	4.80838e-07	2.03393e-06	0.21157	-2.24079
755	cryptochlorogenic acid	292.326	355.101	POS			Shikimates and Phenylpropanoids	Phenylpropanoids	Cinnamic acids and derivatives	1.26977	2.39506e-06	8.15636e-06	41.8653	5.38768
756	6-(1,1-dimethylallyl)-2-(1-hydroxy-1-methylethyl)-2,3-dihydro-7h-furo[3,2-g]chromen-7-one	552.967	337.142	POS			Shikimates and Phenylpropanoids	Coumarins	Furocoumarins	1.06872	0.000546522	0.0010529	0.300271	-1.73566
757	dag(18:2/18:3)	636.549	632.521	POS						1.22689	0.000153286	0.000333008	0.412383	-1.27794
758	10-hydroxyloganin	242.784	407.157	POS		C11659	Terpenoids	Monoterpenoids	Iridoids monoterpenoids	1.2312	9.11045e-10	1.06536e-08	143.711	7.16702
759	[2-(hydroxymethyl)-10-[3,4,5-trihydroxy-6-(hydroxymethyl)oxan-2-yl]oxy-3,9-dioxatricyclo[4.4.0.0^{2,4}]dec-7-en-5-yl] 3,4-dimethoxybenzoate	384.773	571.157	NEG						1.17651	1.62525e-05	4.41562e-05	1.15696	0.210339
760	uncarine c	416.32	407.144	POS			Alkaloids	Tryptophan alkaloids	Corynanthe type alkaloids	1.16635	8.14519e-05	0.000187928	0.607249	-0.71964
761	broussochalcone b	329.427	325.142	POS			Shikimates and Phenylpropanoids	Flavonoids	Chalcones	1.27216	4.10226e-14	4.97453e-12	5.06438	2.34038
762	2'-hydroxyacetophenone	250.007	137.059	POS	118-93-4	C07189	Others	Others	Others	1.26284	4.56454e-10	6.07606e-09	1.70505	0.769814
763	grandidentatin	325.099	425.172	POS			Others	Others	Others	1.26967	2.51943e-07	1.17082e-06	0.249086	-2.00528
764	farnesyl pyrophosphate	96.1461	383.142	POS	13058-04-3	C00448	Terpenoids	Sesquiterpenoids	Farnesane sesquiterpenoids	1.12372	0.000174899	0.00037492	1.26554	0.339751
765	eleutheroside e	261.027	801.279	NEG			Shikimates and Phenylpropanoids	Lignans	Furofuranoid lignans	1.24245	1.19984e-07	6.2133e-07	0.306556	-1.70578
766	3-methoxy-4,5-methylenedioxycinnamaldehyde	277.822	207.064	POS	74683-19-5		Shikimates and Phenylpropanoids	Phenylpropanoids	Cinnamic acids and derivatives	1.2064	3.25486e-06	1.06683e-05	0.540372	-0.887975
767	oroxin a	233.729	455.084	POS			Shikimates and Phenylpropanoids	Flavonoids	Flavones	1.22071	1.39575e-06	5.10173e-06	0.662791	-0.593374
768	mgdg(2:0/5:0)	214.653	425.165	NEG						1.11799	0.000170741	0.000366953	0.22676	-2.14076
769	(3,6,9-trimethylidene-2-oxo-3a,4,5,6a,7,8,9a,9b-octahydroazuleno[4,5-b]furan-8-yl) acetate	356.817	289.142	POS			Terpenoids	Sesquiterpenoids	Guaiane sesquiterpenoids	1.27062	1.589e-08	1.13412e-07	3.65265	1.86894
770	7-[(2~{e})-3,7-dimethylocta-2,6-dienoxy]-1,3-dihydroxyxanthen-9-one	471.195	381.165	POS						1.17103	4.46409e-07	1.90832e-06	0.222026	-2.1712
771	pa(2:0/20:3)	362.071	501.268	NEG						1.0171	0.00893461	0.0138128	1.76888	0.822837
772	mangostin	446.706	411.176	POS		C10080	Shikimates and Phenylpropanoids	Xanthones	Plant xanthones	1.0701	0.00360762	0.00596051	0.451227	-1.14807
773	dihydroconiferin	275.126	345.15	POS	17609-06-2		Shikimates and Phenylpropanoids			1.27267	1.18324e-08	8.83616e-08	1.89642	0.923281
774	tenuifoliside c	264.539	767.239	NEG						1.27377	3.90317e-09	3.51785e-08	0.2403	-2.05709
775	methyl orsellinate	303.515	205.042	POS			Polyketides	Aromatic polyketides	Depsides	1.204	8.9298e-06	2.5986e-05	0.527122	-0.923792
776	kaempferol-7-o-beta-d-glucopyranoside	248.903	449.099	POS			Shikimates and Phenylpropanoids	Flavonoids	Flavonols	1.26669	2.26667e-07	1.06864e-06	0.407212	-1.29615
777	lupinine	271.699	170.153	POS			Alkaloids	Lysine alkaloids	Quinolizidine alkaloids	1.1094	0.000196746	0.000417186	0.623599	-0.68131
778	mirificin	283.73	571.139	POS			Others	Others	Others	1.26816	4.42966e-06	1.39845e-05	0.141512	-2.821
779	nicotinamide	41.2455	123.055	POS		C00153	Alkaloids	Nicotinic acid alkaloids	Pyridine alkaloids	1.20146	6.00513e-07	2.46338e-06	0.560822	-0.834386
780	picolinic acid	337.952	124.039	POS		C10164	Alkaloids	Nicotinic acid alkaloids	Pyridine alkaloids	1.27158	3.35785e-14	4.34421e-12	2.91519	1.54359
781	panaxynol	515.57	245.189	POS		C17447	Others	Others	Others	1.02636	0.00073904	0.00138516	1.58705	0.666345
782	tectoridin	235.889	485.104	POS			Shikimates and Phenylpropanoids	Isoflavonoids	Isoflavones	1.2176	9.41475e-07	3.63015e-06	2.75834	1.4638
783	quercetin 3-gentiobioside	213.566	627.151	POS			Shikimates and Phenylpropanoids	Flavonoids	Flavonols	1.1713	7.75943e-06	2.29479e-05	2.12852	1.08985
784	safflomin a	241.445	613.171	POS			Shikimates and Phenylpropanoids	Flavonoids	Chalcones	1.272	1.67619e-13	1.29163e-11	0.500142	-0.999591
785	nordihydroguaiaretic acid	450.686	325.142	POS		C10719	Shikimates and Phenylpropanoids	Lignans	Dibenzylbutane lignans	1.16724	3.03655e-10	4.35048e-09	8.80918	3.13901
786	2''-rhamnosylvitexin	246.238	579.167	POS			Shikimates and Phenylpropanoids	Flavonoids	Flavones	1.0176	0.00107081	0.00194771	1.30884	0.388287
787	8-prenylnaringenin	508.97	341.137	POS			Shikimates and Phenylpropanoids	Flavonoids	Flavanones	1.08178	0.000509104	0.000987746	2.18793	1.12956
788	2,3,5,4'-tetrahydroxyl-diphenylethylene-2-o-beta-d-glucoside	210.48	429.114	POS			Shikimates and Phenylpropanoids	Stilbenoids	Monomeric stilbenes	1.00029	0.0091964	0.0141855	0.498111	-1.00546
789	(2e,6e)-3,7,11-trimethyl-2,6,10-dodecatrien-1-ol	462.524	245.189	POS		C06081	Terpenoids	Sesquiterpenoids	Farnesane sesquiterpenoids	1.25919	6.30923e-09	5.24092e-08	1.49627	0.581368
790	(2alpha,3beta,4alpha,9alpha)-2,3,23-trihydroxyurs-12-en-28-oic acid	500.971	489.363	POS			Terpenoids	Triterpenoids	Ursane and Taraxastane triterpenoids	1.26892	1.96598e-11	4.87501e-10	0.539676	-0.889833
791	adenine	136.845	136.061	POS		C00147	Alkaloids	Histidine alkaloids	Imidazole alkaloids	1.25081	8.20205e-06	2.41058e-05	0.0897125	-3.47855
792	beta-asarone	336.17	231.1	POS		C17821	Shikimates and Phenylpropanoids			1.25637	1.86167e-09	1.91427e-08	0.721522	-0.470884
793	atractylenolide i	441.426	253.118	POS			Terpenoids	Sesquiterpenoids	Eudesmane sesquiterpenoids	1.27418	4.43704e-07	1.89844e-06	676.203	9.40131
794	arnicolide d	424.216	355.151	POS			Terpenoids	Sesquiterpenoids	Pseudoguaiane sesquiterpenoids	1.27081	5.38975e-12	1.80669e-10	0.479873	-1.05927
795	trans-cinnamic acid	358.293	147.045	NEG		C10438	Shikimates and Phenylpropanoids	Phenylpropanoids	Cinnamic acids and derivatives	1.22997	1.37388e-07	6.97178e-07	1.91909	0.940419
796	maleamic acid	215.915	114.019	NEG		C01596	Fatty acids	Fatty Acids and Conjugates	Dicarboxylic acids	1.08241	0.000357741	0.0007175	1.45202	0.538066
797	mudanpioside e	231.502	525.16	NEG			Terpenoids	Monoterpenoids	Pinane monoterpenoids	1.27078	4.482e-12	1.55635e-10	1.71725	0.780098
798	luteolin-4'-o-glucoside	391.114	447.098	NEG			Shikimates and Phenylpropanoids	Flavonoids	Flavones	1.24431	2.92566e-09	2.77522e-08	5.13717	2.36097
799	adenosine (not validated)	138.215	268.103	POS			Carbohydrates	Nucleosides	Purine nucleosides	1.26644	1.9653e-08	1.35177e-07	0.110118	-3.18287
800	carnosine	197.195	110.071	POS		C00386	Amino acids and Peptides	Small peptides	Dipeptides	1.2566	6.09422e-08	3.49404e-07	14.0785	3.81542
801	(-)-egcg-3''-o-me	289.716	473.106	POS			Shikimates and Phenylpropanoids	Flavonoids	Flavan-3-ols	1.1255	0.000158537	0.000343337	2.07907	1.05594
802	4-hydroxybenzaldehyde	49.0027	123.043	POS		C00633	Shikimates and Phenylpropanoids	Phenolic acids	Simple phenolic acids	1.26699	1.83016e-07	8.87838e-07	2.75012	1.45949
803	coumaroyl quinic acid (isomer of 758, 759)	265.666	337.092	NEG			Shikimates and Phenylpropanoids	Phenylpropanoids	Cinnamic acids and derivatives	1.27254	1.30513e-13	1.07877e-11	0.381821	-1.38903
804	dihydrocoumarin	100.394	147.045	NEG			Shikimates and Phenylpropanoids	Flavonoids		1.26405	8.66622e-14	8.0842e-12	11.5192	3.52597
805	pg(4:0/18:3)	479.49	575.301	NEG						1.25285	0.000927937	0.00170743	10.937	3.45114
806	5,7-dihydroxy-2-(2-hydroxyphenyl)-3-(((2r,3s,4r,5r,6s)-3,4,5-trihydroxy-6-((((2s,3s,4s,5s,6s)-3,4,5-trihydroxy-6-methyltetrahydro-2h-pyran-2-yl)oxy)methyl)tetrahydro-2h-pyran-2-yl)oxy)-4h-chromen-4-one	222.501	617.135	POS			Shikimates and Phenylpropanoids	Flavonoids	Flavonols	1.0602	4.28972e-07	1.84582e-06	9.0286	3.1745
807	tenuifoliside b	260.343	691.181	POS			Shikimates and Phenylpropanoids	Phenolic acids	Simple phenolic acids	1.16428	1.82175e-05	4.88058e-05	0.407688	-1.29446
808	xanthosine (not validated)	143.514	283.068	NEG			Carbohydrates	Nucleosides	Purine nucleosides	1.2525	4.10257e-12	1.4573e-10	0.0960222	-3.38049
809	epsilon-viniferin	228.957	455.15	POS			Shikimates and Phenylpropanoids	Stilbenoids	Monomeric stilbenes	1.27375	3.13036e-10	4.46503e-09	6.48881	2.69795
810	scopoletin	280.772	191.034	NEG		C01752	Shikimates and Phenylpropanoids	Coumarins	Simple coumarins	1.2743	2.34218e-09	2.31424e-08	21080.6	14.3636
811	leucine; lc-tdda; ce10	249.681	130.087	NEG			Amino acids and Peptides	Small peptides	Amino fatty acids	1.13715	9.18706e-05	0.000209172	1.98243	0.987273
812	typhaneoside	255.15	771.24	POS			Shikimates and Phenylpropanoids	Flavonoids	Flavonols	1.16674	0.000116557	0.000259647	0.616421	-0.698013
813	duartin	356.778	333.131	POS			Shikimates and Phenylpropanoids	Isoflavonoids	Isoflavanones	1.26901	1.34004e-11	3.64278e-10	3.39487	1.76336
814	convallatoxin	647.815	589.245	POS		C08858	Terpenoids	Steroids	Cardenolides	1.23976	2.30515e-05	6.02052e-05	0.00259731	-8.58877
815	asperuloside	313.6	437.105	POS			Terpenoids	Monoterpenoids	Iridoids monoterpenoids	1.20893	3.24307e-08	2.04548e-07	6.5142	2.70359
816	lpa(22:1)	522.451	491.315	NEG						1.0692	1.89505e-11	4.7386e-10	0.0348449	-4.84291
817	4-hydroxy-3-methoxymandelic acid	297.773	197.045	NEG		C05584	Shikimates and Phenylpropanoids	Phenylpropanoids	Cinnamic acids and derivatives	1.27158	1.3664e-07	6.93743e-07	3.36975	1.75264
818	2',5'-dihydroxy-4-methoxychalcone	357.632	269.082	NEG			Shikimates and Phenylpropanoids	Flavonoids	Chalcones	1.00602	0.00200671	0.00347505	1.4328	0.518836
819	isorhamnetin 3-rutinoside 4'-rhamnoside	344.727	771.244	POS	81053-13-6		Shikimates and Phenylpropanoids	Flavonoids	Flavonols	1.2486	1.54468e-08	1.10674e-07	0.601392	-0.733623
820	prenyletin	291.048	264.118	POS			Shikimates and Phenylpropanoids	Coumarins	Simple coumarins	1.08122	0.0032749	0.00544967	0.827454	-0.273249
821	alpha-hederin	428.545	751.453	POS			Terpenoids	Triterpenoids	Oleanane triterpenoids	1.0041	0.00194753	0.00337952	0.722891	-0.46815
822	oleanolic acid base + o-hexa-hex	494.021	793.435	NEG			Terpenoids	Triterpenoids	Oleanane triterpenoids	1.27028	6.37477e-12	2.0369e-10	2.11204	1.07864
823	ginkgolide b	405.093	425.133	POS		C07602	Terpenoids	Sesquiterpenoids	Picrotoxane sesquiterpenoids	1.22354	6.61433e-07	2.67498e-06	1.11814	0.161096
824	9-hydroxy-1,4a-dimethyl-7-propan-2-yl-2,3,4,9,10,10a-hexahydrophenanthrene-1-carboxylic acid	435.474	334.233	POS			Terpenoids	Diterpenoids	Abietane diterpenoids	1.25196	5.26983e-09	4.51301e-08	0.641192	-0.641172
825	pe(2:0/5:0)	275.411	340.11	NEG						1.15931	2.63085e-05	6.76837e-05	1.19064	0.251734
826	schizandrin	336.068	471.181	POS			Shikimates and Phenylpropanoids	Lignans	Dibenzocyclooctadienes lignans	1.23906	1.24905e-07	6.43114e-07	1.4429	0.528967
827	anhalamine	507.034	210.109	POS			Alkaloids	Tyrosine alkaloids	Tetrahydroisoquinoline alkaloids	1.26037	1.7257e-10	2.74713e-09	1.93564	0.952807
828	dehydroabietadienol	542.13	286.236	POS			Terpenoids	Diterpenoids	Abietane diterpenoids	1.05082	0.0244465	0.0350156	0.439886	-1.1848
829	1-[3-methoxy-4-[(2s,3r,4s,5s,6r)-3,4,5-trihydroxy-6-[[(2r,3r,4r,5r,6s)-3,4,5-trihydroxy-6-methyloxan-2-yl]oxymethyl]oxan-2-yl]oxyphenyl]ethanone	313.77	513.137	POS			Others	Others	Others	1.27171	5.53264e-06	1.70125e-05	21.6176	4.43413
830	canadine	314.828	340.155	POS			Alkaloids	Tyrosine alkaloids	Isoquinoline alkaloids	1.26006	1.37437e-10	2.29654e-09	2.19863	1.1366
831	taraxerone	503.789	447.355	POS			Terpenoids	Triterpenoids	Taraxerane triterpenoids	1.12542	0.000103795	0.000233762	0.579996	-0.785886
832	glabranine	603.894	325.142	POS		C09752	Shikimates and Phenylpropanoids	Coumarins	Pyranocoumarins	1.07516	1.37225e-06	5.02677e-06	0.239785	-2.06019
833	5,6,7,3'-tetramethoxy-4',5'-methylenedioxyflavone	284.399	387.105	POS			Shikimates and Phenylpropanoids	Flavonoids	Flavones	1.27227	8.2208e-07	3.2299e-06	0.19112	-2.38745
834	9-methoxycamptothecin	311.278	379.134	POS			Alkaloids	Tryptophan alkaloids	Pyrroloquinoline alkaloids	1.27287	8.02086e-09	6.41188e-08	0.167527	-2.57754
835	terniflorin	280.393	579.143	POS	61237-19-2		Shikimates and Phenylpropanoids	Flavonoids	Flavones	1.24127	4.13157e-08	2.51094e-07	1.47909	0.564709
836	isoflavone base + 2o, o-hex	252.716	417.116	POS			Shikimates and Phenylpropanoids	Isoflavonoids	Isoflavones	1.2507	2.84414e-07	1.29986e-06	0.0943152	-3.40637
837	glcadg(18:2/18:5)	609.6	785.494	NEG						1.21269	4.74522e-05	0.000115236	116.155	6.85991
838	(-)-bilobalide	224.278	325.093	NEG			Terpenoids	Sesquiterpenoids	Prezizaane sesquiterpenoids	1.16002	4.91993e-05	0.000119038	0.903977	-0.145642
839	dorspoinsettifolin	359.504	337.141	POS			Shikimates and Phenylpropanoids	Flavonoids	Flavanones	1.21374	2.86677e-06	9.54676e-06	0.655554	-0.609214
840	glucose 6-phosphate	55.65	283.017	POS		C00092	Carbohydrates	Saccharides	Monosaccharides	1.245	1.62538e-07	8.03302e-07	0.680517	-0.555297
841	p-coumaraldehyde	280.459	149.059	POS		C05608	Shikimates and Phenylpropanoids	Phenylpropanoids	Cinnamic acids and derivatives	1.22334	3.16312e-07	1.42328e-06	0.551202	-0.859346
842	tetrahydrocurcumin	329.431	395.144	POS			Shikimates and Phenylpropanoids	Diarylheptanoids	Linear diarylheptanoids	1.21923	2.14085e-06	7.3948e-06	1.54534	0.627922
843	hexose + c13h19o (isomer of 1061)	265.17	415.196	NEG			Terpenoids	Apocarotenoids	Megastigmanes	1.25272	1.01762e-08	7.8166e-08	1.60303	0.680806
844	pgd2	406.483	353.227	POS		C00696	Fatty acids	Eicosanoids	Isoprostanes	1.24369	2.32718e-08	1.55479e-07	0.467133	-1.09809
845	arjungenin	469.86	505.357	POS			Terpenoids	Triterpenoids	Oleanane triterpenoids	1.25351	1.30686e-08	9.62372e-08	0.727555	-0.458871
846	isorhamnetin 3-glucoside	208.214	477.106	NEG			Shikimates and Phenylpropanoids	Flavonoids	Flavonols	1.25614	5.28516e-10	6.81518e-09	1.82321	0.866479
847	(1r,2r,4ar,8as)-1-[2-(furan-3-yl)ethyl]-2,4a,5-trimethyl-2,3,4,7,8,8a-hexahydronaphthalene-1-carboxylic acid	455.894	339.194	POS			Terpenoids	Diterpenoids	Labdane diterpenoids	1.23313	6.55131e-05	0.000154198	3.32743	1.73441
848	alpha-d-glucose	206.984	179.056	NEG		C00267	Carbohydrates	Saccharides	Monosaccharides	1.19386	0.000339504	0.000683834	0.788963	-0.341971
849	(4s,4ar,8as)-4-[(3r)-3-hydroxy-3-methylpent-4-enyl]-3,4a,8,8-tetramethyl-5,6,7,8a-tetrahydro-4h-naphthalen-1-one	301.629	327.226	POS			Terpenoids	Diterpenoids	Labdane diterpenoids	1.24494	3.71412e-08	2.29739e-07	0.642899	-0.637337
850	[(~{e})-3-[4-[1-hydroxy-1-(4-hydroxy-3-methoxyphenyl)-3-[(~{e})-3-(4-hydroxyphenyl)prop-2-enoyl]oxypropan-2-yl]oxy-3,5-dimethoxyphenyl]prop-2-enyl] (~{e})-3-(4-hydroxyphenyl)prop-2-enoate	397.189	716.272	POS						1.2493	7.12165e-08	3.9841e-07	0.544013	-0.878288
851	2-methylfuran	430.12	83.0487	POS	534-22-5		Polyketides	Cyclic polyketides	Furans	1.27205	4.55286e-09	3.99362e-08	0.384428	-1.37921
852	methyl 4,10-diacetyloxy-5,9-dihydroxy-1,4a-dimethyl-7-propan-2-yl-2,3,4,9,10,10a-hexahydrophenanthrene-1-carboxylate	647.826	501.193	POS			Terpenoids	Diterpenoids	Podocarpane diterpenoids	1.22169	1.27605e-06	4.71231e-06	0.585292	-0.772772
853	8:1+2o fatty acyl hexoside	274.901	321.155	NEG			Fatty acids	Fatty acyl glycosides	Fatty acyl glycosides	1.27387	8.27852e-10	9.84845e-09	5.52057	2.46482
854	anhydroicaritin	449.959	369.131	POS			Shikimates and Phenylpropanoids	Flavonoids	Flavonols	1.22634	8.08573e-05	0.000186668	0.62426	-0.679781
855	5-hydroxy-3-(4-methoxyphenyl)-7-(((2s,3r,4s,5s,6r)-3,4,5-trihydroxy-6-(hydroxymethyl)tetrahydro-2h-pyran-2-yl)oxy)-4h-chromen-4-one	309.648	469.109	POS			Shikimates and Phenylpropanoids	Isoflavonoids	Isoflavones	1.19799	1.57986e-06	5.67812e-06	0.190072	-2.39538
856	3-[(3~{s},5~{s},8~{r},9~{s},10~{s},13~{r},14~{s},17~{r})-3,14-dihydroxy-10,13-dimethyl-1,2,3,4,5,6,7,8,9,11,12,15,16,17-tetradecahydrocyclopenta[a]phenanthren-17-yl]-2~{h}-furan-5-one	605.952	375.251	POS						1.23336	7.33398e-10	8.92139e-09	6.67532	2.73884
857	norleucine	50.8912	130.087	NEG		C01933	Amino acids and Peptides	Small peptides	Amino fatty acids	1.27177	5.26187e-06	1.62862e-05	12.1848	3.60701
858	feruloyl quinic acid	220.182	369.115	POS			Shikimates and Phenylpropanoids	Phenylpropanoids	Cinnamic acids and derivatives	1.26621	1.18168e-11	3.31549e-10	3.62344	1.85736
859	bergenin	238.406	327.07	NEG			Shikimates and Phenylpropanoids	Coumarins	Isocoumarins	1.25639	2.64192e-11	6.08317e-10	0.184077	-2.44162
860	pmeoh(14:1/18:3)	521.649	653.402	NEG						1.14586	6.56002e-05	0.000154384	1.3745	0.458908
861	3-methylquercetin	298.436	297.043	NEG		C10084	Shikimates and Phenylpropanoids	Flavonoids	Flavonols	1.23961	4.1836e-08	2.53698e-07	0.413434	-1.27427
862	uracil	48.9579	113.034	POS		C00106	Alkaloids	Nicotinic acid alkaloids	Pyridine alkaloids	1.26216	3.08844e-07	1.39372e-06	0.0685306	-3.86711
863	3,3',4,4'-tetramethoxy-7,7'-epoxylignan	646.518	395.182	POS			Shikimates and Phenylpropanoids	Lignans	Furanoid lignans	1.27091	6.17544e-05	0.000146133	0.00259697	-8.58896
864	trachelanthine	77.4886	302.194	POS			Others	Others	Others	1.05645	0.000836482	0.00155274	1.31529	0.395376
865	(3as,5r,5as,8as,9ar)-5,8a-dimethyl-1-methylidene-3a,4,5,5a,6,7,9,9a-octahydroazuleno[6,7-b]furan-2,8-dione	382.067	266.171	POS			Terpenoids	Sesquiterpenoids	Pseudoguaiane sesquiterpenoids	1.11722	8.45496e-05	0.000194356	0.767323	-0.382094
866	isoflavone base + 1o, 1meo, o-malonylhex	366.117	517.13	POS			Shikimates and Phenylpropanoids	Isoflavonoids	Isoflavones	1.26051	0.00176675	0.00309023	0.00431309	-7.85706
867	14-(hydroxymethyl)-5,9-dimethyltetracyclo[11.2.1.0,.0,hexadecan-5-ol	397.19	315.229	POS						1.27209	1.59333e-14	2.66382e-12	4.78208	2.25764
868	swertisin	224.911	469.109	POS			Shikimates and Phenylpropanoids	Flavonoids	Flavones	1.25799	8.01892e-10	9.61252e-09	2.49307	1.31792
869	ampelopsin d	321.234	455.149	POS	149418-37-1		Shikimates and Phenylpropanoids	Stilbenoids	Monomeric stilbenes	1.27346	3.18169e-16	2.19781e-13	3.65645	1.87044
870	3-[5,7-dihydroxy-2-(4-methoxyphenyl)-4-oxo-2,3-dihydrochromen-3-yl]-5,7-dihydroxy-2-(4-methoxyphenyl)-2,3-dihydrochromen-4-one	384.601	571.152	POS			Shikimates and Phenylpropanoids	Flavonoids	Flavanones	1.26681	1.2776e-06	4.71715e-06	2.00122	1.00088
871	dalbergione	463.231	269.079	POS			Shikimates and Phenylpropanoids	Flavonoids	Neoflavonoids	1.2519	8.68382e-05	0.000199043	0.11549	-3.11417
872	verimol i	205.662	207.102	POS	53484-54-1		Shikimates and Phenylpropanoids	Phenylpropanoids	Cinnamic acids and derivatives	1.24573	0.000364382	0.0007295	4.84291	2.27587
873	2-[3,4-dihydroxy-2,2-dimethyl-8-(3-methylbut-2-enoxy)-3,4-dihydrochromen-6-yl]-5,7-dihydroxy-2,3-dihydrochromen-4-one	383.972	495.147	POS			Shikimates and Phenylpropanoids	Isoflavonoids	Flavanones	1.27159	4.28684e-14	5.14012e-12	0.216685	-2.20633
874	dehydrofalcarinol	470.376	243.173	POS			Fatty acids	Fatty acyls	Hydrocarbons	1.1054	0.000241225	0.000501305	1.0949	0.130795
875	panaxadiol	458.486	483.377	POS			Terpenoids	Triterpenoids	Dammarane and Protostane triterpenoids	1.01865	0.0395523	0.0547309	0.374597	-1.41659
876	methylswertianin	314.272	289.069	POS			Shikimates and Phenylpropanoids	Xanthones	Methyl xanthones	1.25807	2.4601e-09	2.40739e-08	0.377355	-1.406
877	2-(3,4-dihydroxyphenyl)-5,7-dihydroxy-3-[(2~{s},3~{r},4~{s},5~{s},6~{r})-3,4,5-trihydroxy-6-[[(2~{s},3~{r},4~{s},5~{r})-3,4,5-trihydroxyoxan-2-yl]oxymethyl]oxan-2-yl]oxychromen-4-one	218.068	595.133	NEG						1.19975	0.000131706	0.000290136	0.0993236	-3.33172
878	(2~{s},3~{r},4~{s},5~{s},6~{r})-2-[4-[(3~{s},3~{a}~{r},6~{s},6~{a}~{r})-3-(4-hydroxy-3,5-dimethoxyphenyl)-1,3,3~{a},4,6,6~{a}-hexahydrofuro[3,4-c]furan-6-yl]-2,6-dimethoxyphenoxy]-6-(hydroxymethyl)oxane-3,4,5-triol	325.755	625.212	NEG						1.07427	0.000341805	0.000688182	0.804627	-0.313609
879	saucernetin	433.497	355.185	POS			Shikimates and Phenylpropanoids	Lignans	Furanoid lignans	1.13119	0.000237101	0.000493797	6.56597	2.71501
880	nerol	432.237	172.169	POS		C09871	Terpenoids	Monoterpenoids	Acyclic monoterpenoids	1.17845	4.53351e-05	0.000110636	1.42768	0.51367
881	5,7-dihydroxy-6-(3-methylbut-2-en-1-yl)-2-phenylchroman-4-one	486.37	325.142	POS						1.27113	6.06276e-07	2.48333e-06	12.1928	3.60796
882	limocitrin 3-glucoside	323.157	509.123	POS	38836-51-0		Shikimates and Phenylpropanoids	Flavonoids	Flavonols	1.27407	1.43761e-09	1.54557e-08	0.04203	-4.57244
883	(r)-pelletierine	527.535	142.122	POS	2858-66-4		Alkaloids	Lysine alkaloids	Piperidine alkaloids	1.22666	4.64525e-07	1.97399e-06	1.30908	0.38855
884	pa(2:0/20:2)	395.064	503.285	NEG						1.27264	2.0716e-08	1.41158e-07	2.31446	1.21068
885	5,7-dihydroxy-2-(4-hydroxyphenyl)-6-[(2s,3r,4r,5s,6r)-3,4,5-trihydroxy-6-(hydroxymethyl)oxan-2-yl]-8-[(2s,3r,4r,5r,6s)-3,4,5-trihydroxy-6-methyloxan-2-yl]chromen-4-one	359.432	601.165	POS			Shikimates and Phenylpropanoids	Flavonoids	Flavones	1.09167	0.000159313	0.000344785	0.417339	-1.26071
886	4-methoxycinnamic acid	340.918	177.055	NEG			Shikimates and Phenylpropanoids	Phenylpropanoids	Cinnamic acids and derivatives	1.27406	4.59572e-09	4.023e-08	0.197827	-2.33769
887	ldgts(16:1)	491.322	472.36	POS						1.12132	0.000132791	0.000292293	0.840662	-0.250402
888	lusitanicoside	337.076	441.176	NEG		C10474	Shikimates and Phenylpropanoids	Phenylpropanoids	Cinnamic acids and derivatives	1.27026	9.72323e-13	4.77921e-11	4.40709	2.13983
889	cycloalliin	38.8529	178.058	POS	455-41-4		Others	Others	Others	1.22019	7.70142e-06	2.27927e-05	8.63527	3.11024
890	3-hydroxyflavone	48.317	261.057	POS		C01495	Shikimates and Phenylpropanoids	Flavonoids	Flavonols	1.23795	2.96225e-07	1.34699e-06	0.31462	-1.66832
891	pg(2:0/4:0)	41.6045	357.102	NEG						1.14722	2.40539e-05	6.25698e-05	2.17312	1.11977
892	oleuropeic acid	306.287	185.114	POS						1.17754	1.84013e-05	4.92268e-05	0.792278	-0.335921
893	2'-prenyleriodictyol	340.061	357.131	POS			Shikimates and Phenylpropanoids	Flavonoids	Flavanones	1.27067	5.47239e-13	3.10849e-11	3.1562	1.65819
894	simmondsin 2'-ferulate	283.071	552.204	POS	179466-18-3		Others	Others	Others	1.26433	3.30988e-10	4.66774e-09	0.686529	-0.542607
895	bornane-2,3-dione	339.921	167.106	POS		C14515	Terpenoids	Monoterpenoids	Camphane monoterpenoids	1.18992	3.13697e-06	1.03362e-05	1.73751	0.797019
896	(2~{r},3~{s},4~{s},5~{r},6~{r})-2-[[(2~{r},3~{r},4~{r})-3,4-dihydroxy-4-(hydroxymethyl)oxolan-2-yl]oxymethyl]-6-phenylmethoxyoxane-3,4,5-triol	248.469	420.184	POS						1.04961	0.00112087	0.00203161	0.876887	-0.189538
897	xmp	57.1247	363.031	NEG	523-98-8	C00655	Carbohydrates	Nucleosides	Purine nucleotides	1.23216	2.14074e-08	1.45103e-07	2.55672	1.35429
898	alpha-irone	527.535	207.173	POS	79-69-6	C09690	Terpenoids	Apocarotenoids	Apocarotenoids	1.20325	5.65705e-06	1.73524e-05	1.32084	0.401456
899	rhododendrin	264.964	329.158	POS			Shikimates and Phenylpropanoids			1.27286	6.97008e-10	8.56929e-09	6.58516	2.71922
900	10-hydroxycamptothecin	270.281	365.118	POS			Alkaloids	Tryptophan alkaloids	Pyrroloquinoline alkaloids	1.24848	2.63881e-08	1.72311e-07	1.13361	0.180918
901	annuionone a	233.856	225.149	POS	201288-96-2		Terpenoids	Apocarotenoids	Apocarotenoids	1.10941	0.000176482	0.000377946	0.879711	-0.184899
902	heterophylol	461.816	409.233	POS	152841-81-1		Shikimates and Phenylpropanoids	Meroterpenoids		1.03443	0.00321009	0.0053515	0.859964	-0.217652
903	isoliquiritigenin	519.879	254.246	POS		C08650	Shikimates and Phenylpropanoids	Flavonoids	Chalcones	1.2518	2.13714e-08	1.44929e-07	1.69997	0.765513
904	pa(2:0/18:2)	497.997	475.245	NEG						1.14823	0.0272903	0.0387786	0.132674	-2.91404
905	dehydrovariabilin	221.83	300.118	POS			Shikimates and Phenylpropanoids	Isoflavonoids	Pterocarpan	1.23949	2.22418e-07	1.05209e-06	353.65	8.46618
906	tsibulin 2	475.779	183.137	POS	126624-27-9		Others	Others	Others	1.23355	9.67277e-05	0.000219325	0.651313	-0.618577
907	gardenoside	233.136	427.118	POS			Terpenoids	Monoterpenoids	Iridoids monoterpenoids	1.26224	2.15168e-10	3.27949e-09	0.676478	-0.563885
908	crustecdysone	249.393	503.303	POS		C02633	Terpenoids	Steroids	Ecdysteroids	1.26544	6.01102e-12	1.95563e-10	0.175837	-2.50769
909	2-methoxycinnamic acid	385.921	177.055	NEG			Shikimates and Phenylpropanoids	Phenylpropanoids	Cinnamic acids and derivatives	1.19976	1.40641e-06	5.13587e-06	1.62338	0.698999
910	propylparaben	270.363	181.085	POS			Shikimates and Phenylpropanoids	Phenolic acids	Simple phenolic acids	1.21516	1.88741e-06	6.63311e-06	0.835495	-0.259296
911	n-acetyl-methionine; lc-tdda; ce40	153.692	190.054	NEG			Others	Others	Others	1.25136	0.00446998	0.00727041	113.944	6.83218
912	corosolic acid	552.732	473.369	POS			Terpenoids	Triterpenoids	Ursane and Taraxastane triterpenoids	1.16227	3.0781e-05	7.8084e-05	0.672822	-0.571704
913	taraxerol acetate	539.441	469.397	POS			Terpenoids	Triterpenoids	Taraxerane triterpenoids	1.11156	0.00050408	0.000979079	0.636183	-0.652486
914	[2-[4-methyl-2-(2-methylpropanoyloxy)phenyl]oxiran-2-yl]methyl 2-methylpropanoate	330.053	343.151	POS			Polyketides			1.24891	2.19514e-08	1.48012e-07	2.4736	1.30661
915	pa(2:0/15:1)	316.379	435.222	NEG						1.22439	0.00169212	0.00297002	2.68949	1.42733
916	tambulin 3,5-diacetate	398.501	429.115	POS			Shikimates and Phenylpropanoids	Flavonoids	Flavonols	1.15712	4.99013e-05	0.00012051	0.793544	-0.333617
917	aloin a	255.47	441.1	POS			Polyketides	Polycyclic aromatic polyketides	Anthraquinones and anthrones	1.27377	3.16626e-18	1.74972e-14	0.177001	-2.49817
918	tricaffeoyl quinic acid	307.865	677.149	NEG			Shikimates and Phenylpropanoids	Phenylpropanoids	Cinnamic acids and derivatives	1.25267	1.24016e-09	1.36795e-08	3.59011	1.84403
919	ponganone viii	285.731	427.176	POS			Shikimates and Phenylpropanoids	Flavonoids	Chalcones	1.20498	0.000438396	0.000861754	0.502533	-0.992709
920	taraxasterol	632.688	427.391	POS		C08636	Terpenoids	Triterpenoids	Ursane and Taraxastane triterpenoids	1.25384	1.43605e-08	1.04321e-07	0.535789	-0.900264
921	trehalose	44.4405	343.121	POS		C01083	Carbohydrates	Saccharides	Disaccharides	1.26665	1.16385e-12	5.47819e-11	0.328219	-1.60727
922	malabaricone c	326.676	359.183	POS	63335-25-1		Polyketides	Aromatic polyketides		1.20367	6.03799e-08	3.46642e-07	2.81074	1.49095
923	tiliroside	205.4	593.135	NEG			Shikimates and Phenylpropanoids	Flavonoids	Flavonols	1.02473	0.00135761	0.00242548	1.69688	0.762885
924	thymoquinone	41.2679	203.051	POS			Terpenoids	Sesquiterpenoids	Acorane sesquiterpenoids	1.26906	8.85983e-08	4.79268e-07	0.154754	-2.69195
925	rutamarin	278.409	395.132	POS		C09308	Shikimates and Phenylpropanoids	Coumarins	Furocoumarins	1.26724	8.09128e-12	2.45679e-10	2.98819	1.57927
926	shionone	552.309	449.371	POS			Terpenoids	Triterpenoids	Shionane triterpenoids	1.23711	2.97519e-05	7.56619e-05	0.5532	-0.854126
927	pg(2:0/8:0)	424.528	413.158	NEG						1.27017	9.89791e-13	4.82826e-11	0.404244	-1.3067
928	[(2~{r},3~{r})-2-(3,4-dihydroxyphenyl)-5-hydroxy-7-methoxy-4-oxo-2,3-dihydrochromen-3-yl] acetate	282.4	361.087	POS						1.25304	1.29588e-08	9.55375e-08	0.626922	-0.673642
929	maltitol	378.157	343.118	NEG			Carbohydrates	Saccharides	Disaccharides	1.20403	6.44661e-06	1.94565e-05	0.822055	-0.282694
930	pa(2:0/12:0)	224.314	395.191	NEG						1.19605	0.000492571	0.000958602	2.48593	1.31379
931	(2e,4e,12z)-n-(2-methylpropyl)octadeca-2,4,12-trienamide	559.997	334.308	POS			Fatty acids	Fatty acyls	Hydrocarbons	1.01238	0.00254592	0.00432497	1.31696	0.397211
932	sylvestroside i	318.82	749.281	POS			Terpenoids	Monoterpenoids	Iridoids monoterpenoids	1.27313	0.000145149	0.000316738	0.00157342	-9.31188
933	curcumenol	396.81	233.154	NEG		C16942	Terpenoids	Sesquiterpenoids	Guaiane sesquiterpenoids	1.26043	2.21944e-12	8.98999e-11	4.83799	2.27441
934	l(+/-)-alliin	310.441	176.04	NEG			Others	Others	Others	1.26078	2.21382e-10	3.35307e-09	2.34308	1.22841
935	sinapoylhexoside (isomer of 953)	224.278	385.112	NEG			Shikimates and Phenylpropanoids	Phenylpropanoids	Cinnamic acids and derivatives	1.20815	2.77725e-06	9.28702e-06	0.891178	-0.166214
936	mgdg(2:0/2:0)	101.827	383.112	NEG						1.18261	4.55487e-08	2.73087e-07	0.238093	-2.0704
937	3-hydroxybutyric acid	91.8324	103.04	NEG		C01089	Fatty acids	Fatty Acids and Conjugates	Hydroxy fatty acids	1.06667	0.000878488	0.00162417	0.82638	-0.275123
938	oleic acid ethyl ester	507.755	311.293	POS	111-62-6	C03425	Fatty acids	Fatty esters	Wax monoesters	1.2461	1.35573e-08	9.92498e-08	1.67933	0.747886
939	marchantin a	330.04	441.17	POS			Shikimates and Phenylpropanoids	Diarylheptanoids	Diarylether type diarylheptanoids	1.24607	0.000351859	0.000706366	3.46913	1.79457
940	gitoxigenin	458.004	391.244	POS			Terpenoids	Steroids	Cardenolides	1.17472	1.4681e-05	4.03154e-05	0.787704	-0.344274
941	loganin	198.952	435.147	NEG		C01433	Terpenoids	Monoterpenoids	Iridoids monoterpenoids	1.21533	2.4506e-06	8.32277e-06	0.66289	-0.593159
942	pelargonidin-3,5-di-o-glucoside	284.973	594.152	NEG			Others	Others	Others	1.25924	1.24191e-09	1.36947e-08	1.59717	0.675519
943	nigakihemiacetal a	408.394	411.228	POS			Terpenoids	Triterpenoids	Quassinoids	1.19025	5.6398e-08	3.27427e-07	0.163735	-2.61057
944	d-(-)-salicin	292.074	271.061	NEG		C01451	Shikimates and Phenylpropanoids	Phenolic acids	Simple phenolic acids	1.25884	3.83519e-11	8.24662e-10	0.266666	-1.9069
945	solacapine	519.513	433.376	POS			Alkaloids	Pseudoalkaloids	Steroidal alkaloids	1.00934	0.00217321	0.00373927	0.897523	-0.155978
946	2-glucosyloxy-4-methoxycinnamic acid	263.35	379.1	POS			Shikimates and Phenylpropanoids	Phenylpropanoids	Cinnamic acids and derivatives	1.23827	3.25152e-05	8.20099e-05	0.66474	-0.589138
947	icariside ii	422.348	515.202	POS			Shikimates and Phenylpropanoids	Flavonoids	Flavonols	1.26137	1.19928e-09	1.33081e-08	2.05742	1.04084
948	(3r)-5-methyl-3-[(2s,3r,4s,5s,6r)-3,4,5-trihydroxy-6-(hydroxymethyl)oxan-2-yl]oxy-3-[[4-[(2s,3r,4s,5s,6r)-3,4,5-trihydroxy-6-(hydroxymethyl)oxan-2-yl]oxyphenyl]methoxycarbonyl]hexanoic acid	366.125	659.191	POS			Terpenoids			1.13308	3.76221e-07	1.65023e-06	0.279355	-1.83983
949	ps(18:2/18:4)	481.459	778.471	NEG						1.16847	4.58001e-05	0.000111688	0.477855	-1.06536
950	pa(18:2/24:4)	631.731	775.531	NEG						1.04232	0.00161341	0.00284336	1.34633	0.429033
951	lappaconitine	446.688	623.261	POS			Alkaloids	Pseudoalkaloids	Terpenoid alkaloids	1.27252	1.84466e-08	1.28618e-07	7.03224	2.81398
952	eupomatenoid 5	231.433	317.118	POS			Shikimates and Phenylpropanoids	Lignans		1.26747	1.49868e-11	3.97077e-10	0.516518	-0.953108
953	distichin	341.455	449.102	POS			Shikimates and Phenylpropanoids	Flavonoids	Flavonols	1.27414	2.19708e-10	3.33292e-09	0.161808	-2.62765
954	pentose-hexose + c10h17	344.067	447.222	NEG			Terpenoids	Monoterpenoids	Acyclic monoterpenoids	1.19989	3.00535e-06	9.96024e-06	1.71832	0.781001
955	schisandrin a	644.532	417.237	POS			Shikimates and Phenylpropanoids	Lignans	Dibenzocyclooctadienes lignans	1.24465	4.53945e-09	3.98398e-08	0.492429	-1.02201
956	germacrone	448.047	241.157	POS			Terpenoids	Sesquiterpenoids	Germacrane sesquiterpenoids	1.27098	9.01181e-08	4.85791e-07	0.249966	-2.00019
957	(3beta)-lup-20(29)-ene-3,28-diol	488.344	465.366	POS			Terpenoids	Triterpenoids	Lupane triterpenoids	1.25672	1.07239e-08	8.14993e-08	0.609325	-0.714717
958	(+)-dihydrokavain	80.2597	230.972	NEG			Shikimates and Phenylpropanoids	Styrylpyrones	Kavalactones and derivatives	1.16922	1.65856e-07	8.17613e-07	0.24497	-2.02932
959	luvangetin	424.179	281.079	POS			Shikimates and Phenylpropanoids	Coumarins	Pyranocoumarins	1.272	5.17296e-13	2.95577e-11	0.493319	-1.01941
960	galbanic acid	467.173	399.212	POS			Shikimates and Phenylpropanoids	Coumarins	Simple coumarins	1.19159	3.17505e-05	8.02485e-05	2.1677	1.11617
961	calomelanol d-1	265	389.142	POS			Shikimates and Phenylpropanoids	Flavonoids	Neoflavonoids	1.0075	0.0020243	0.00350315	1.14144	0.190852
962	3,7-dimethoxyflavone	364.13	283.094	POS			Shikimates and Phenylpropanoids	Flavonoids	Flavonols	1.27359	5.81959e-08	3.36049e-07	11.7413	3.55352
963	flavanone base + 4o, 1prenyl	449.065	355.117	NEG			Shikimates and Phenylpropanoids	Isoflavonoids	Flavanones	1.27342	8.69801e-08	4.72033e-07	10.7811	3.43043
964	(r)-11,12,13-trinor-1(5),6,9-guaiatrien-8-one	424.179	175.11	POS	71305-89-0		Terpenoids	Sesquiterpenoids		1.18164	0.000744716	0.00139512	0.482355	-1.05183
965	1,8-dihydroxy-3-methylnaphthalene	418.292	175.074	POS			Polyketides	Naphthalenes	Naphthalenes and derivatives	1.26764	1.68722e-13	1.29241e-11	4.4227	2.14493
966	mgdg(16:3/18:3)	584.496	764.527	POS						1.08931	7.12859e-05	0.000166609	2.5859	1.37067
967	5-pregnane-3,20-dione	43.8596	304.148	POS						1.25359	2.09998e-09	2.11215e-08	0.344503	-1.53741
968	lpa(24:2)	551.082	517.327	NEG						1.2537	1.41656e-05	3.90402e-05	2.88872	1.53043
969	lpa(17:0)	645.602	423.25	NEG						1.19945	8.95642e-06	2.60555e-05	0.255193	-1.97034
970	5,7-dihydroxy-6-methoxy-2-[4-[(2s,3r,4s,5s,6r)-3,4,5-trihydroxy-6-(hydroxymethyl)oxan-2-yl]oxyphenyl]chromen-4-one	307.811	461.109	NEG			Shikimates and Phenylpropanoids	Flavonoids	Flavones	1.26984	3.79938e-14	4.72043e-12	0.204372	-2.29073
971	pa(2:0/16:3)	258.276	445.206	NEG						1.10933	0.000222764	0.000466781	1.11067	0.151431
972	citrusin	319.925	349.124	POS			Shikimates and Phenylpropanoids	Phenylpropanoids	Cinnamic acids and derivatives	1.27132	1.55169e-12	6.8835e-11	2.95115	1.56128
973	dag(3:0/22:5)	424.238	478.349	POS						1.17734	1.94963e-05	5.18327e-05	0.626451	-0.674725
974	4-[5-(4-hydroxy-3-methoxyphenyl)-3,4-dimethyloxolan-2-yl]-2-methoxyphenol	450.01	367.149	POS			Shikimates and Phenylpropanoids	Lignans	Furanoid lignans	1.26499	7.52e-07	2.99183e-06	0.0523844	-4.25472
975	3'-demethylnobiletin	275.741	389.121	POS			Shikimates and Phenylpropanoids	Flavonoids	Flavones	1.22535	4.18072e-07	1.80696e-06	0.846653	-0.240157
976	ononin	316.293	453.123	POS		C10509	Shikimates and Phenylpropanoids	Isoflavonoids	Isoflavones	1.27419	2.46244e-07	1.14834e-06	0.00161038	-9.27838
977	dg(16:0/16:0/0:0)	614.917	591.495	POS		C00165	Fatty acids	Glycerolipids	Diacylglycerols	1.26024	2.88928e-09	2.74812e-08	0.485753	-1.04171
978	echinocystic acid	491.322	473.363	POS			Terpenoids	Triterpenoids	Oleanane triterpenoids	1.05026	0.000850841	0.0015772	0.867806	-0.204555
979	chrysophanol-8-o-beta-d-glucopyranoside	299.95	439.098	POS			Polyketides	Polycyclic aromatic polyketides	Anthraquinones and anthrones	1.06294	2.38465e-06	8.12306e-06	0.0330502	-4.9192
980	14-deoxyandrographolide	464.503	357.204	POS			Terpenoids	Diterpenoids	Labdane diterpenoids	1.23093	2.08615e-07	9.94803e-07	1.40474	0.490303
981	dag(18:3/18:3)	617.305	630.506	POS						1.25249	3.44602e-08	2.1563e-07	0.570179	-0.810514
982	caffeoyl quinic acid (isomer of 831, 832, 833)	296.601	353.086	NEG			Shikimates and Phenylpropanoids	Phenylpropanoids	Cinnamic acids and derivatives	1.18278	2.9994e-06	9.94477e-06	9.24594	3.20882
983	5,7-dimethoxy-2-phenyl-4h-chromen-4-one	424.142	283.085	POS			Shikimates and Phenylpropanoids	Flavonoids	Flavones	1.09047	1.53844e-05	4.20517e-05	0.412607	-1.27716
984	1-[2,4-dihydroxy-6-[(2s,3r,4s,5s,6r)-3,4,5-trihydroxy-6-(hydroxymethyl)oxan-2-yl]oxyphenyl]-3-(4-methoxyphenyl)propan-1-one	390.557	473.14	POS			Shikimates and Phenylpropanoids	Flavonoids	Chalcones	1.17857	1.34325e-05	3.72228e-05	0.763021	-0.390205
985	gmelinol	423.516	441.131	POS			Shikimates and Phenylpropanoids	Lignans	Furofuranoid lignans	1.10482	0.000289168	0.000591534	1.17032	0.226899
986	lasiocarpine	269.62	412.241	POS			Alkaloids	Ornithine alkaloids	Pyrrolizidine alkaloids	1.27365	3.68979e-09	3.36632e-08	7.09092	2.82597
987	tubuloside a	286.4	829.274	POS			Shikimates and Phenylpropanoids	Phenylethanoids	Cinnamic acids and derivatives	1.21171	1.11942e-05	3.17189e-05	0.511213	-0.968004
988	hecogenin	606.69	448.347	POS		C08902	Terpenoids	Steroids	Spirostane steroids	1.10943	0.000224849	0.000470688	0.840799	-0.250168
989	vitamin d2 (ergocalciferol)	618.204	397.345	POS	50-14-6		Terpenoids	Steroids	Ergostane steroids	1.27278	1.26585e-07	6.50635e-07	0.14896	-2.74701
990	verimol j	277.741	183.1	POS	212516-43-3		Polyketides	Aromatic polyketides	Simple aromatic polyketides	1.25904	2.93201e-10	4.22448e-09	1.77216	0.82551
991	verproside	250.179	497.127	NEG			Terpenoids	Monoterpenoids	Iridoids monoterpenoids	1.1607	4.71294e-05	0.000114538	1.24284	0.313636
992	alpha,beta-dihydroresveratrol	336.217	229.087	NEG			Shikimates and Phenylpropanoids	Stilbenoids	Monomeric stilbenes	1.26829	3.10514e-11	6.92711e-10	0.64716	-0.627805
993	pe(24:1/18:2)	551.777	824.619	NEG						1.06875	0.000168768	0.000363095	0.497258	-1.00793
994	()-threo-anethole glycol	258.885	183.101	POS						1.26603	6.938e-12	2.1749e-10	2.77621	1.47311
995	pa(2:0/13:0)	323.385	409.207	NEG						1.25949	1.97935e-09	2.01493e-08	0.453779	-1.13994
996	pa(2:0/13:1)	261.845	407.19	NEG						1.19247	1.04688e-05	2.98844e-05	1.22487	0.292634
997	ptaeroxylin	360.747	259.095	POS			Polyketides	Chromanes	Chromones	1.24025	7.60001e-13	3.95681e-11	16.4426	4.03936
998	seconeokadsuranic acid a	517.578	491.312	POS			Terpenoids	Triterpenoids	Lanostane, Tirucallane and Euphane triterpenoids	1.15347	2.5079e-05	6.4922e-05	1.4976	0.582648
999	avocadienofuran	520.858	247.204	POS	34227-08-2		Fatty acids	Fatty acyls	Hydrocarbons	1.1479	0.00010028	0.000226532	1.20582	0.270016
1000	glabrone	388.429	337.105	POS			Shikimates and Phenylpropanoids	Isoflavonoids	Isoflavones	1.09746	3.1523e-05	7.97882e-05	1.78402	0.835131
1001	fargesin	343.42	371.147	POS			Shikimates and Phenylpropanoids	Lignans	Furofuranoid lignans	1.26656	1.48961e-10	2.44577e-09	1.85059	0.887989
1002	hydroxyphenylethanol + pen	199.044	299.114	NEG			Shikimates and Phenylpropanoids	Phenylethanoids	Phenylethanoids	1.04617	0.000758074	0.00141802	1.6441	0.717297
1003	lps(6:0)	213.706	356.108	NEG						1.24425	7.85112e-05	0.000181727	4.79392	2.26121
1004	lpi(2:0)	310.411	375.07	NEG						1.26502	6.33731e-10	7.92584e-09	2.07636	1.05406
1005	sibiricaxanthone b	228.669	539.135	POS			Shikimates and Phenylpropanoids	Xanthones	Plant xanthones	1.23331	7.1825e-07	2.8753e-06	1.40978	0.495467
1006	hbmp(16:0/18:5/22:6)	514.533	1049.67	NEG						1.2666	5.95558e-07	2.44649e-06	0.0879618	-3.50698
1007	dag(9:0/13:1)	407.076	444.365	POS						1.21303	2.48747e-06	8.43541e-06	0.817912	-0.289982
1008	dag(8:0/13:1)	398.925	430.349	POS						1.20603	2.66288e-06	8.95803e-06	0.776274	-0.365363
1009	dag(6:0/13:1)	387.782	402.318	POS						1.15883	4.59663e-05	0.000112035	1.31449	0.394498
1010	pa(5:0/8:0)	264.512	381.175	NEG						1.13907	2.01282e-07	9.63756e-07	0.165472	-2.59534
1011	bmp(3:0/18:5)	384.531	576.302	POS						1.25147	2.09589e-13	1.50418e-11	11.4526	3.5176
1012	lps(22:0)	470.178	580.37	NEG						1.12186	0.000232903	0.000485787	1.38405	0.468895
1013	petoh(25:0/18:2)	552.218	825.631	NEG						1.17353	2.5251e-05	6.52756e-05	0.553904	-0.852293
1014	dag(5:0/14:1)	406.955	402.319	POS						1.24841	6.73256e-09	5.53765e-08	3.1842	1.67093
1015	lpe(22:0)	640.544	538.384	POS						1.23712	8.74639e-08	4.74142e-07	0.0466213	-4.42287
1016	cer/ns(d18:1/18:1)	623.654	564.522	POS						1.23612	1.20717e-07	6.2446e-07	0.324821	-1.62228
1017	dag(4:0/13:1)	392.938	374.287	POS						1.2618	2.81222e-10	4.07435e-09	1.821	0.864729
1018	dgts(3:0/18:3)	575.341	552.398	POS						1.21491	0.00167166	0.0029369	0.156692	-2.67399
1019	lpc(5:0)	251.362	386.162	NEG						1.22886	1.45983e-07	7.34913e-07	0.163035	-2.61675
1020	sm(d15:3/26:2)	565.329	793.645	POS						1.0116	0.0070139	0.0110404	0.351166	-1.50978
1021	petoh(15:0/16:1)	543.433	659.476	NEG						1.19994	0.00017422	0.000373599	0.548218	-0.867177
1022	glcadg(18:2/20:5)	626.439	813.527	NEG						1.20841	8.0442e-06	2.36922e-05	3.04058	1.60435
1023	pa(2:0/14:1)	342.211	421.207	NEG						1.19657	6.03094e-06	1.83451e-05	3.02112	1.59508
1024	dag(3:0/4:0)	44.3481	236.148	POS						1.26707	2.36238e-11	5.61327e-10	0.492299	-1.02239
1025	cer/ns(d18:1/16:1)	624.59	536.501	POS						1.24375	2.51513e-05	6.50657e-05	0.461094	-1.11687
1026	ps(16:0/16:1)	543.622	732.496	NEG						1.11571	0.00028235	0.000578871	1.75839	0.814256
1027	pc(14:1/22:4)	614.047	780.549	POS						1.26527	5.37064e-07	2.23799e-06	2.05388	1.03835
1028	dag(15:1/18:3)	615.032	592.498	POS						1.24369	3.02195e-08	1.9306e-07	0.499496	-1.00146
1029	pi(2:0/8:0)	323.088	501.16	NEG						1.2628	1.6797e-08	1.18699e-07	0.0335242	-4.89865
1030	pg(4:0/5:0)	83.7306	399.149	NEG						1.2162	4.72033e-07	2.00018e-06	2.18032	1.12454
1031	pc(16:2e/3:0)	510.78	534.36	POS						1.19755	2.56763e-06	8.66878e-06	1.49975	0.584725
1032	ps(18:2/22:3)	597.039	836.516	NEG						1.25169	6.05035e-05	0.000143472	3.04135	1.60471
1033	pa(5:0/7:0)	214.407	367.16	NEG						1.1794	2.21968e-08	1.49406e-07	0.256329	-1.96393
1034	lpa(20:2)	644.149	461.265	NEG						1.26043	2.77665e-06	9.28582e-06	0.000985826	-9.98638
1035	pa(3:0/16:4)	349.188	457.207	NEG						1.27333	1.0405e-14	1.96571e-12	0.33603	-1.57334
1036	lpi(18:1)	643.629	597.293	NEG						1.2381	8.21712e-08	4.49848e-07	0.622476	-0.68391
1037	pc(14:0e/21:0)	552.156	762.632	POS						1.24476	1.73467e-08	1.2196e-07	0.53245	-0.909281
1038	dag(3:0/20:3)	473.798	454.35	POS						1.26625	1.09429e-10	1.91109e-09	0.277848	-1.84763
1039	lpi(7:0)	246.24	445.134	NEG						1.21857	3.47275e-06	1.13033e-05	0.513722	-0.960941
1040	pc(6:0/26:1)	499.849	732.544	POS						1.24173	1.06571e-08	8.11037e-08	0.306914	-1.70409
1041	cer/ns(d18:1/12:1)	583.317	480.438	POS						1.24184	6.49508e-08	3.6905e-07	0.354157	-1.49754
1042	dag(13:1/20:5)	596.628	588.467	POS						1.25195	3.81785e-07	1.67065e-06	7.60526	2.927
1043	pg(2:0/9:0)	212.046	427.18	NEG						1.23889	7.80157e-08	4.30757e-07	0.581933	-0.781074
1044	acar(11:0)	407.048	330.262	POS						1.23113	1.1063e-06	4.15969e-06	0.415167	-1.26824
1045	tag(12:2/12:3/16:5)	469.91	692.486	POS						1.05177	0.000613428	0.0011685	1.39504	0.480307
1046	lpg(21:1)	470.178	551.335	NEG						1.10207	0.000183638	0.000391862	1.41138	0.497107
1047	pa(3:0/21:1)	470.178	533.326	NEG						1.22332	4.70494e-05	0.000114387	1.54746	0.629905
1048	tag(12:3/14:0/16:5)	469.834	729.509	POS						1.22257	3.1078e-07	1.40116e-06	1.28319	0.35973
1049	tag(15:2/22:7/22:7)	469.847	951.657	POS						1.16765	1.68356e-05	4.55389e-05	1.33236	0.413985
1050	tag(12:3/12:3/15:1)	469.834	689.488	POS						1.21715	1.27042e-06	4.69556e-06	1.21887	0.285541
1051	acar(12:1)	467.202	342.262	POS						1.24646	0.000682107	0.00128806	0.186859	-2.41998
1052	lpc(4:0)	241.849	372.147	NEG						1.15419	0.00215973	0.00371823	0.333861	-1.58268
1053	dgts(3:0/16:2)	469.834	526.364	POS						1.20082	4.16698e-06	1.32744e-05	1.19631	0.258594
1054	bmp(24:0/14:1)	611.365	822.602	POS						1.05032	0.0008647	0.00160075	1.21074	0.275889
1055	tag(12:0/12:2/12:2)	469.847	653.469	POS						1.23931	8.01391e-08	4.40469e-07	1.24686	0.318295
1056	dgts(11:0/18:2)	580.021	666.526	POS						1.09106	0.00200897	0.00347865	0.413575	-1.27378
1057	pe(10:0/20:2)	469.914	660.447	POS						1.18193	1.93789e-05	5.15708e-05	1.34112	0.423437
1058	cer/nds(d16:0/16:1)	603.311	510.484	POS						1.05614	0.000391215	0.000777985	0.614488	-0.702543
1059	hbmp(18:3/20:0/20:0)	597.279	1112.87	POS						1.23013	8.29424e-07	3.25303e-06	4.45436	2.15522
1060	lps(14:0)	453.65	468.246	NEG						1.25489	0.000604341	0.0011532	29.3306	4.87434
1061	cer/ns(d18:2/14:0)	602.641	508.469	POS						1.26688	1.67052e-10	2.67802e-09	0.389168	-1.36153
1062	lpi(18:3)	643.024	593.27	NEG						1.18353	2.11352e-05	5.56437e-05	0.64966	-0.622243
1063	dag(17:2/18:4)	611.208	616.497	POS						1.26098	5.50966e-10	7.06665e-09	2.47243	1.30593
1064	dag(15:1/18:2)	566.618	594.505	POS						1.22368	0.000190689	0.000405565	0.253367	-1.9807
1065	cer/ns(d18:3/18:1)	603.37	560.499	POS						1.25889	1.14799e-08	8.62117e-08	0.469818	-1.08982
1066	acar(19:4)	419.604	434.317	POS						1.10984	0.000258595	0.000534075	0.840726	-0.250292
1067	acar(10:1)	414.543	314.23	POS						1.17487	4.00841e-06	1.28348e-05	0.394263	-1.34277
1068	ldgts(16:3)	469.834	468.332	POS						1.21835	9.38321e-07	3.61957e-06	1.20037	0.263474
1069	hexcer/ns(d15:1/12:0)	544.805	602.46	POS						1.21604	6.58925e-07	2.66623e-06	2.36756	1.2434
1070	sm(d14:2/17:0)	509.713	659.516	POS						1.25217	4.3745e-08	2.63827e-07	3.06827	1.61742
1071	pe(5:0/6:0)	241.869	398.199	POS						1.27315	2.25274e-09	2.24247e-08	0.390586	-1.35629
1072	pg(5:0/5:0)	126.271	413.165	NEG						1.17761	1.76536e-05	4.74793e-05	0.457976	-1.12666
1073	oxps(16:0/18:1+3o)	583.967	808.482	NEG						1.26298	1.33069e-05	3.69289e-05	16.7248	4.06392
1074	fahfa(18:4/2:0)	470.178	333.206	NEG						1.18651	8.93229e-06	2.59913e-05	1.23689	0.306712
1075	lps(17:1)	640.591	508.275	NEG						1.26929	1.70859e-11	4.38575e-10	0.40996	-1.28644
1076	lpa(17:1)	443.541	421.236	NEG						1.24913	2.43294e-12	9.69243e-11	8.90976	3.15539
1077	pc(2:0/3:0)	246.922	400.131	NEG						1.24877	5.0621e-05	0.000122119	0.278594	-1.84377
1078	ldgts(17:1)	481.565	486.376	POS						1.26976	1.21514e-11	3.3856e-10	0.464433	-1.10646
1079	mgdg(3:0/5:0)	267.571	453.196	NEG						1.26995	1.9539e-14	3.03544e-12	8.40605	3.07143
1080	dag(13:1/22:6)	616.666	614.481	POS						1.17383	1.94416e-05	5.16986e-05	0.725997	-0.461965
1081	fahfa(2:0/16:2)	454.979	309.207	NEG						1.27265	6.19602e-14	6.4533e-12	0.372634	-1.42417
1082	acar(22:0)	506.923	484.434	POS						1.25165	3.89633e-09	3.51305e-08	1.55407	0.636054
1083	pg(4:0/14:1)	472.142	523.269	NEG						1.13515	1.1736e-10	2.0222e-09	8.48398	3.08474
1084	dgts(2:0/20:2)	562.653	568.425	POS						1.10747	0.00293509	0.00492894	1.91058	0.93401
1085	lpc(7:0)	436.505	414.191	NEG						1.10235	0.00653075	0.0103346	2.85309	1.51252
1086	lpg(7:0)	400.731	357.132	NEG						1.23443	0.000996738	0.00182336	3.67531	1.87786
1087	glcadg(18:3/20:5)	596.428	811.499	NEG						1.26087	2.53131e-05	6.54099e-05	4.97761	2.31545
1088	pe(4:0/13:1)	345.391	480.277	POS						1.25709	7.983e-06	2.35335e-05	0.717999	-0.477945
1089	oxpg(16:0/20:4+1o(1cyc))	595.73	783.482	NEG						1.20961	1.89359e-05	5.0517e-05	12.1208	3.59941
1090	pa(3:0/22:6)	285.431	537.255	NEG						1.23899	1.77365e-07	8.6389e-07	1.86177	0.896676
1091	pg(4:0/4:0)	43.8199	404.174	POS						1.25506	1.68158e-08	1.18789e-07	0.386597	-1.3711
1092	pe(19:0/16:1)	623.16	732.557	POS						1.14768	4.60979e-05	0.000112335	0.7607	-0.3946
1093	shexcer(d18:0/15:0)	469.834	768.533	POS						1.19388	8.52076e-06	2.4942e-05	1.28128	0.357589
1094	dag(5:0/13:1)	389.218	388.302	POS						1.26395	5.5011e-08	3.20915e-07	2.3584	1.23781
1095	pg(4:0/20:3)	504.977	622.376	POS						1.27077	8.3965e-07	3.28813e-06	0.108097	-3.20961
1096	ps(2:0/13:0)	481.679	498.256	POS						1.25678	4.65805e-06	1.4628e-05	0.510907	-0.968868
1097	lpa(20:5)	363.156	455.227	NEG						1.25426	8.35404e-12	2.51721e-10	0.162514	-2.62137
1098	oxpe(18:0/18:1+2o)	631.706	776.533	NEG						1.12931	0.000204946	0.000432606	1.38599	0.470915
1099	lpe(14:1)	498.656	422.239	NEG						1.26839	5.89029e-12	1.93261e-10	4.02323	2.00836
1100	pa(2:0/18:4)	248.39	471.206	NEG						1.22064	9.71784e-10	1.12247e-08	8.90327	3.15434
1101	cer/ns(d18:2/18:1)	623.654	562.515	POS						1.25727	5.31775e-06	1.64407e-05	0.387917	-1.36618
1102	lpa(16:1)	493.362	407.22	NEG						1.23162	0.0001416	0.000309832	3.20027	1.6782
1103	pmeoh(16:0/16:4)	537.808	653.425	NEG						1.25293	2.2364e-06	7.67825e-06	0.143597	-2.7999
1104	dag(16:0/13:1)	615.156	542.475	POS						1.26112	4.26465e-07	1.83708e-06	0.112768	-3.14857
1105	pe(3:0/13:1)	357.442	466.262	POS						1.25335	5.64403e-09	4.7738e-08	0.662926	-0.593079
1106	mgdg(2:0/18:2)	530.393	603.331	NEG						1.09939	0.000170183	0.000365895	4.27981	2.09755
1107	pa(3:0/18:5)	252.15	483.206	NEG						1.10781	0.00011034	0.000247136	1.26884	0.343513
1108	pmeoh(22:5/22:5)	597.039	809.497	NEG						1.24482	0.000123551	0.000273714	3.37901	1.7566
1109	pc(18:5e/19:2)	497.747	776.566	POS						1.25079	2.5924e-05	6.68099e-05	0.255196	-1.97032
1110	fahfa(9:0/20:4)	492.068	459.347	NEG						1.08672	0.00036362	0.000728199	1.37555	0.460004
1111	dag(15:0/15:1)	627.445	556.491	POS						1.19474	0.00276209	0.00466107	0.2523	-1.98679
1112	lpc(3:0)	285.44	372.147	NEG						1.03481	0.00141512	0.00252019	0.646059	-0.630263
1113	pa(2:0/18:5)	226.013	469.19	NEG						1.25401	1.44062e-12	6.5102e-11	0.0904444	-3.46682
1114	pg(4:0/18:5)	428.146	590.314	POS						1.23622	2.55289e-08	1.67862e-07	2.50383	1.32414
1115	pe(16:1e/15:1)	478.3	660.488	POS						1.16316	1.77204e-05	4.76389e-05	1.37295	0.457275
1116	dgts(7:0/7:0)	516.913	460.322	POS						1.25968	1.08706e-05	3.09084e-05	0.0824742	-3.59991
1117	pg(3:0/22:5)	464.844	613.317	NEG						1.26063	3.76415e-05	9.35598e-05	29.1028	4.86308
1118	fahfa(13:1/5:0)	447.697	311.222	NEG						1.27049	6.53402e-17	8.92328e-14	0.132816	-2.9125
1119	pg(20:0/18:2)	611.249	820.587	POS						1.24793	6.84697e-05	0.000160551	3.13868	1.65016
1120	lpe(20:5)	500.973	500.271	POS						1.23994	5.95858e-08	3.42929e-07	0.450677	-1.14984
1121	pg(3:0/14:1)	528.86	528.303	POS						1.00982	4.34719e-05	0.00010654	0.281648	-1.82803
1122	tag(12:2/12:2/14:2)	614.504	677.464	POS						1.26946	2.25952e-11	5.42889e-10	1.81184	0.857454
1123	pa(3:0/16:3)	371.282	459.223	NEG						1.27321	1.70552e-08	1.20194e-07	0.32592	-1.61741
1124	mgdg(2:0/11:0)	436.446	509.253	NEG						1.26328	4.07607e-09	3.64988e-08	20.3207	4.34488
1125	pc(16:2/22:6)	646.532	802.546	POS						1.15153	0.00012333	0.000273272	3.13871	1.65017
1126	pc(4:0/16:1)	363.986	564.358	POS						1.17158	2.21347e-06	7.61348e-06	2.04457	1.0318
1127	pg(4:0/16:0)	552.446	553.307	NEG						1.20347	1.58399e-05	4.31442e-05	2.12627	1.08832
1128	sqdg(12:0/12:0)	542.132	700.445	POS						1.23878	1.31894e-05	3.66341e-05	0.0042886	-7.86528
1129	cer/nds(d14:0/14:1)	618.652	454.423	POS						1.04887	0.000558915	0.0010741	0.75355	-0.408226
1130	pa(6:0/22:5)	400.68	581.332	NEG						1.26693	1.0977e-11	3.12682e-10	2.33638	1.22427
1131	pe(4:0/5:0)	49.0224	370.169	POS						1.23319	8.84202e-07	3.43824e-06	1.95608	0.967967
1132	mgdg(4:0/4:0)	241.137	453.196	NEG						1.12179	1.81907e-05	4.87442e-05	0.587336	-0.767743
1133	lps(22:2)	542.486	576.331	NEG						1.23581	1.97422e-07	9.47992e-07	0.383741	-1.3818
1134	pc(2:0/14:0)	496.087	554.299	NEG						1.19089	2.18871e-05	5.73928e-05	0.478458	-1.06354
1135	lpa(7:0)	425.19	283.092	NEG						1.06481	0.0010065	0.00184018	1.18563	0.245649
1136	petoh(14:1/17:2)	522.201	674.457	POS						1.2282	1.09498e-06	4.12512e-06	1.50576	0.590494
1137	pe(22:5e/2:0)	552.514	554.311	NEG						1.18114	2.80425e-05	7.17392e-05	2.15232	1.10589
1138	pa(2:0/22:5)	408.595	525.247	NEG						1.23525	0.00246644	0.00420046	22.4253	4.48705
1139	lps(18:3)	470.183	518.241	NEG						1.09595	0.000284546	0.00058294	0.865168	-0.208949
1140	fahfa(20:5/15:1)	509.913	539.406	NEG						1.24227	2.41521e-08	1.60501e-07	0.502149	-0.993814
1141	ps(19:0/19:0)	496.122	820.593	POS						1.22457	3.02297e-09	2.8549e-08	0.109873	-3.18609
1142	lpg(14:0)	476.122	455.242	NEG						1.26822	1.52091e-11	4.00772e-10	0.237586	-2.07348
1143	pc(18:5e/2:0)	496.304	542.319	POS						1.23066	0.000141443	0.00030954	0.487587	-1.03627
1144	pc(4:0/7:0)	367.267	484.23	NEG						1.27383	2.15617e-08	1.45874e-07	0.0339412	-4.88082
1145	fahfa(16:4/15:1)	483.448	485.365	NEG						1.23458	9.7558e-09	7.5507e-08	0.455958	-1.13303
1146	hexcer/ns(d18:2/13:1)	474.44	654.501	POS						1.01925	0.0019532	0.00338844	0.84039	-0.250869
1147	dag(12:0/18:4)	490.987	550.444	POS						1.01894	0.000648091	0.00122959	1.65443	0.72633
1148	pi(5:0/18:3)	264.235	677.337	NEG						1.26648	8.15003e-08	4.46871e-07	4.58447	2.19675
1149	cer/ns(d14:3/14:1)	629.256	448.384	POS						1.18199	2.0645e-05	5.452e-05	0.0171966	-5.86174
1150	pa(4:0/24:4)	518.445	583.336	NEG						1.26566	4.90133e-07	2.06714e-06	0.332576	-1.58825
1151	pc(3:0/3:0)	346.612	414.148	NEG						1.2734	8.088e-16	4.06322e-13	0.200067	-2.32145
1152	cer/bs(d28:1/27:1)	37.2763	844.826	NEG						1.09562	0.00324609	0.00540545	0.418116	-1.25802
1153	lps(18:4)	527.814	516.243	NEG						1.26633	6.11708e-06	1.85838e-05	0.114721	-3.1238
1154	hexcer/ns(d14:2/12:0)	630.182	586.434	POS						1.09982	0.000238025	0.000495535	1.22	0.28688
1155	pc(14:1e/5:0)	643.873	536.368	POS						1.24749	6.82168e-05	0.000160007	0.0721401	-3.79306
1156	petoh(12:0/18:2)	469.253	662.469	POS						1.23953	1.68348e-08	1.18879e-07	0.597965	-0.741868
1157	dag(2:0/17:2)	481.035	400.303	POS						1.26772	4.26323e-11	8.98228e-10	1.58259	0.662289
1158	pg(4:0/16:2)	485.521	549.281	NEG						1.16167	0.00760009	0.0118915	2.59514	1.37581
1159	dgdg(17:0/17:2)	566.908	934.635	POS						1.0282	0.00061673	0.00117441	2.01779	1.01277
1160	tag(12:0/12:3/19:1)	552.732	746.637	POS						1.0738	0.000116192	0.000258969	0.50599	-0.98282
1161	cer/nds(d14:0/15:1)	555.359	468.439	POS						1.25284	2.48663e-08	1.64232e-07	1.53439	0.617666
1162	pe(24:0/18:2)	551.856	826.636	NEG						1.03349	0.000920019	0.00169375	0.522956	-0.935238
1163	shexcer(d29:1/12:0)	611.245	878.629	POS						1.191	1.12796e-07	5.89068e-07	4.27543	2.09607
1164	pc(2:0/5:0)	407.871	428.175	NEG						1.25345	2.05728e-08	1.4048e-07	1.86921	0.902429
1165	pa(10:0/10:0)	523.655	479.297	NEG						1.27027	1.78976e-12	7.70114e-11	0.266417	-1.90824
1166	pg(10:0/11:0)	344.736	586.377	POS						1.02826	0.00205983	0.00356018	0.832658	-0.264203
1167	dgdg(16:0/17:2)	519.211	947.611	NEG						1.22662	5.61152e-05	0.000133953	0.0666232	-3.90783
1168	pi(7:0/18:2)	511.871	707.393	NEG						1.17757	2.54147e-05	6.56329e-05	1.52424	0.608086
1169	pa(3:0/20:3)	519.856	515.272	NEG						1.26226	4.22289e-06	1.34227e-05	0.302874	-1.72321
1170	pc(14:1e/17:2)	619.497	700.533	POS						1.00942	0.0134312	0.0201372	0.702023	-0.510409
1171	cer/ns(d15:1/12:0)	507.977	440.406	POS						1.26918	1.56144e-11	4.10334e-10	1.84914	0.886855
1172	pmeoh(12:0/18:2)	463.952	648.452	POS						1.24854	4.99396e-08	2.95069e-07	0.455563	-1.13428
1173	lps(5:0)	438.442	342.097	NEG						1.10227	0.000140842	0.000308435	0.687706	-0.540137
1174	lpc(27:0)	513.862	694.501	NEG						1.20352	1.21944e-05	3.42072e-05	0.450622	-1.15001
1175	sqdg(18:2/16:4)	463.929	809.432	NEG						1.20752	9.50851e-17	1.06917e-13	0.0151848	-6.04123
1176	pa(2:0/24:4)	552.442	555.304	NEG						1.19932	1.34002e-05	3.71452e-05	2.18846	1.12991
1177	tag(12:0/12:1/19:1)	597.959	750.657	POS						1.18808	1.45417e-05	3.99771e-05	0.678106	-0.560417
1178	pc(3:0/15:1)	514.052	580.336	NEG						1.27384	9.97827e-06	2.86363e-05	508.318	8.98959
1179	glcadg(17:1/18:2)	611.166	779.526	NEG						1.09917	0.000364575	0.000729773	0.637542	-0.649408
1180	lpg(22:5)	496.649	557.299	NEG						1.19748	5.07639e-05	0.000122402	0.525342	-0.928671
1181	dgdg(18:2/16:4)	501.32	953.558	NEG						1.27149	6.68355e-08	3.76935e-07	0.190438	-2.39261
1182	pc(9:0/9:0)	552.444	582.335	NEG						1.23267	1.22302e-07	6.31643e-07	3.23876	1.69544
1183	dgdg(16:0/22:5)	514.523	1025.63	NEG						1.26473	2.40507e-05	6.25698e-05	0.139449	-2.84219
1184	pg(2:0/7:0)	398.473	399.144	NEG						1.24311	1.68252e-10	2.69502e-09	0.225555	-2.14845
1185	pe(10:0/16:3)	430.478	600.366	NEG						1.2742	3.41214e-07	1.51732e-06	0.000554737	-10.8159
1186	fahfa(17:0/2:0)	461.632	327.253	NEG						1.00317	0.00257836	0.0043745	0.87176	-0.197996
1187	tag(14:1/20:6/22:7)	469.76	913.643	POS						1.11868	0.000165943	0.000357772	1.25558	0.328359
1188	pa(6:0/6:0)	261.37	367.151	NEG						1.24081	4.42761e-05	0.000108271	0.429358	-1.21975
1189	pi(16:4/18:5)	490.05	819.395	NEG						1.20409	5.04565e-06	1.56847e-05	0.692749	-0.529595
1190	pa(2:0/4:0)	330.484	283.065	NEG						1.23938	2.65834e-07	1.22639e-06	0.61053	-0.711865
1191	hexcer/ap(t16:2/15:1)	517.864	684.477	NEG						1.0951	0.000682085	0.00128806	0.712768	-0.488495
1192	pc(3:0/16:1)	496.385	594.338	NEG						1.24269	4.88706e-05	0.000118324	0.454044	-1.1391
1193	ps(2:0/7:0)	476.129	412.136	NEG						1.22905	6.92195e-07	2.78483e-06	2.50153	1.32281
1194	pe(18:2e/2:0)	496.139	504.308	NEG						1.22577	2.49516e-06	8.45704e-06	0.461164	-1.11665
1195	pa(2:0/3:0)	320.373	269.056	NEG						1.10464	7.76915e-05	0.000180025	2.24683	1.16789
1196	pa(4:0/6:0)	288.724	339.122	NEG						1.26268	7.19019e-10	8.79349e-09	1.38622	0.471156
1197	pa(6:0/22:6)	476.809	579.302	NEG						1.22878	3.72857e-08	2.30477e-07	0.486651	-1.03904
1198	pc(2:0/13:0)	529.074	554.315	NEG						1.25628	1.14283e-06	4.27916e-06	0.23089	-2.11472
1199	ps(2:0/5:0)	227.548	384.1	NEG						1.19687	1.10309e-06	4.15045e-06	0.429227	-1.22019
1200	pa(2:0/7:0)	391.413	325.107	NEG						1.22929	7.48802e-10	9.07738e-09	4.0516	2.01849
1201	dgdg(18:2/18:4)	496.022	995.611	NEG						1.26851	1.45129e-07	7.31565e-07	0.326481	-1.61493
1202	ps(3:0/18:2)	491.399	576.301	NEG						1.15699	2.5389e-05	6.5577e-05	4.0708	2.02531
1203	dgts(5:0/11:0)	488.344	488.351	POS						1.00893	0.00189576	0.00329857	0.693917	-0.527166
1204	cer/as(d14:2/12:0)	483.475	484.362	NEG						1.16166	4.98828e-07	2.10015e-06	0.376896	-1.40776
1205	pa(3:0/26:4)	537.142	597.35	NEG						1.27122	5.0292e-06	1.56386e-05	0.114517	-3.12637
1206	pi(3:0/4:0)	80.3073	459.134	NEG						1.26863	2.1646e-07	1.02728e-06	0.190213	-2.39431
1207	pe(2:0/18:5)	519.98	512.232	NEG						1.15321	3.41689e-05	8.57837e-05	0.502575	-0.992588
1208	pa(3:0/14:1)	501.958	435.217	NEG						1.26749	6.52454e-08	3.70234e-07	4.46778	2.15956
1209	acylglcadg(18:2/18:4/18:4)	639.625	1045.67	NEG						1.26519	0.00190481	0.00331297	0.000741728	-10.3968
1210	lps(19:2)	519.856	534.28	NEG						1.25544	1.14642e-08	8.61609e-08	0.399171	-1.32492
1211	pi(2:0/4:0)	391.358	445.1	NEG						1.25201	8.5931e-10	1.0156e-08	4.47792	2.16283
1212	lpi(16:3)	283.672	565.228	NEG						1.2709	2.26649e-12	9.15854e-11	0.556479	-0.845602
1213	pa(5:0/22:3)	530.452	571.335	NEG						1.19045	2.77648e-07	1.27284e-06	0.230969	-2.11423
1214	pi(5:0/9:0)	206.621	557.233	NEG						1.26926	2.30204e-07	1.08347e-06	8.68337	3.11825
1215	ps(5:0/16:0)	552.503	580.327	NEG						1.24307	2.30404e-05	6.0184e-05	2.23052	1.15738
1216	mgdg(4:0/20:3)	404.462	630.434	POS						1.22246	2.26691e-06	7.76988e-06	1.8398	0.879547
1217	ps(3:0/18:1)	510.574	578.316	NEG						1.12187	0.00418711	0.00683821	2.54539	1.34789
1218	tag(12:3/15:1/19:5)	633.268	783.568	POS						1.2368	1.69569e-07	8.32521e-07	1.56283	0.644159
1219	dgts(5:0/10:0)	536.157	474.353	POS						1.10029	0.000287556	0.000588577	0.745888	-0.422968

## Sheet: Table S3
Table S3 Broad-targeted metabolomics profiling
ID	compound name	EXACT_MASS	CAS	KEGG_ID	FORMULA	INCHIKEY	Superclass	CLASS	Subclass	VIP	P-Value	Q-Value	Fold_Change	Log_Foldchange
A0A0	Formononetin	268.074	485-72-3	C00858	C16H12O4	HKQYGTCOTHHOMP-UHFFFAOYSA-N	Shikimates and Phenylpropanoids	Isoflavonoids	Isoflavones	1.19046	0.00011475	0.000380044	2.70413	1.43516
A0D8	Isoquercitrin	464.095	482-35-9	C05623	C21H20O12	OVSQVDMCBVZWGM-QSOFNFLRSA-N	Shikimates and Phenylpropanoids	Flavonoids	Flavonols	1.2726	2.04185e-07	2.07205e-06	2.59848	1.37767
A0D9	Delphinidin	303.05	528-53-0	C05908	C15H11O7+	JKHRCGUTYDNCLE-UHFFFAOYSA-O				1.37873	4.09784e-08	5.85692e-07	3.07634	1.62121
A0F0	Okanin	288.063	484-76-4		C15H12O6	GSBNFGRTUCCBTK-DAFODLJHSA-N	Shikimates and Phenylpropanoids	Flavonoids	Chalcones	1.23044	0.000175338	0.000552812	2.36225	1.24016
A0F6	Khellin	260.068	82-02-0	C09010	C14H12O5	HSMPDPBYAYSOBC-UHFFFAOYSA-N	Polyketides	Chromanes	Chromones	1.16328	0.00053018	0.00139704	1.39937	0.484779
A0H3	Neoeriocitrin	596.174	13241-32-2	C09805	C27H32O15	OBKKEZLIABHSGY-DOYQYKRZSA-N	Shikimates and Phenylpropanoids	Flavonoids	Flavanones	1.33868	3.52484e-07	3.21491e-06	1.73017	0.790918
A0I0	Chrysin dimethylether	282.089	21392-57-4	C10029	C17H14O4	JRFZSUMZAUHNSL-UHFFFAOYSA-N	Shikimates and Phenylpropanoids	Flavonoids	Flavones	1.26537	2.03316e-05	8.79006e-05	0.595636	-0.747496
A0K2	Tamarixetin	316.058	603-61-2	C10188	C16H12O7	FPLMIPQZHHQWHN-UHFFFAOYSA-N	Shikimates and Phenylpropanoids	Flavonoids	Flavonols	1.25404	5.90394e-05	0.000215285	0.576792	-0.793877
A0K6	Wogonin	284.068	632-85-9		C16H12O5	XLTFNNCXVBYBSX-UHFFFAOYSA-N	Shikimates and Phenylpropanoids	Flavonoids	Flavones	1.33523	7.73751e-07	5.94307e-06	0.783613	-0.351787
A0O0	Quercetin 3-o-beta-D-(6''-o-malonyl)-glucoside	550.096	96862-01-0		C24H22O15	NBQPHANHNTWDML-UJKBSQBPSA-N	Shikimates and Phenylpropanoids	Flavonoids	Flavonols	1.20528	5.73426e-05	0.000211232	1.61017	0.687213
A0O9	Gardenin B	358.105	2798-20-1	C15109	C19H18O7	LXEVSYZNYDZSOB-UHFFFAOYSA-N	Shikimates and Phenylpropanoids	Flavonoids	Flavones	1.35011	1.31599e-07	1.50817e-06	2.21549	1.14763
A0Q6	Rhamnocitrin	300.063		C17059	C16H12O6	MQSZRBPYXNEFHF-UHFFFAOYSA-N	Shikimates and Phenylpropanoids	Flavonoids	Flavonols	1.12863	0.000363451	0.0010372	0.593201	-0.753407
A0S3	Choline	104.108	62-49-7	C00114	C5H14NO	OEYIOHPDSNJKLS-UHFFFAOYSA-N				1.15938	0.000552302	0.00143188	0.895537	-0.159175
A0U9	Histidine	155.069	71-00-1	C00135	C6H9N3O2	HNDVDQJCIGZPNO-YFKPBYRVSA-N	Amino acids and Peptides	Small peptides	Aminoacids	1.12525	0.00116966	0.00272418	0.842397	-0.247428
A0X4	D-Pantothenic Acid	219.111	79-83-4	C00864	C9H17NO5	GHOKWGTUZJEAQD-ZETCQYMHSA-N	Amino acids and Peptides	Small peptides	Dipeptides	1.32868	5.79717e-07	4.65062e-06	0.805957	-0.311225
A0Z0	Hypoxanthine	136.039	68-94-0	C00262	C5H4N4O	FDGQSTZJBFJUBT-UHFFFAOYSA-N	Alkaloids	Pseudoalkaloids	Purine alkaloids	1.10669	0.00283659	0.00595353	1.71087	0.77473
A1A7	Myo-Inositol	180.063	87-89-8	C00137	C6H12O6	CDAISMWEOUEBRE-UHFFFAOYSA-N	Carbohydrates	Polyols	Cyclitols	1.15971	0.000754327	0.00188451	0.879732	-0.184865
A1E7	Glycerophosphocholine	257.103	28319-77-9	C00670	C8H20NO6P	SUHOQUVVVLNYQR-MRVPVSSYSA-O				1.18666	0.000492461	0.00131688	0.77979	-0.358843
A1I3	Hypotaurine	109.02	300-84-5	C00519	C2H7NO2S	VVIUBCNYACGLLV-UHFFFAOYSA-N	Amino acids and Peptides	Small peptides	Aminoacids	1.32118	1.27384e-06	8.95527e-06	0.749984	-0.415068
A1K2	5-Methylcytosine	125.059	554-01-8	C02376	C5H7N3O	LRSASMSXMSNRBT-UHFFFAOYSA-N	Alkaloids	Pseudoalkaloids	pteridine alkaloids	1.22804	0.000117933	0.000388802	0.83434	-0.261293
A1N0	L-Histidinol	141.09	1596-64-1	C00860	C6H11N3O	ZQISRDCJNBUVMM-YFKPBYRVSA-N	Amino acids and Peptides	Small peptides	Aminoacids	1.08915	0.00274999	0.00580553	0.861018	-0.215885
A1P1	Vanillin	152.047	121-33-5	C00755	C8H8O3	MWOOGOJBHIARFG-UHFFFAOYSA-N	Shikimates and Phenylpropanoids	Phenolic acids	Cinnamic acids and derivatives	1.35915	8.72898e-09	1.96948e-07	1.83153	0.873049
A1Q2	Orotic acid	156.017	65-86-1	C00295	C5H4N2O4	PXQPEWDEAKTCGB-UHFFFAOYSA-N	Alkaloids	Pseudoalkaloids		1.00719	0.00873221	0.0161244	1.14979	0.201372
A1R3	Meglutol	162.053	503-49-1	C03761	C6H10O5	NPOAOTPXWNWTSH-UHFFFAOYSA-N	Fatty acids	Fatty Acids and Conjugates	Dicarboxylic acids	1.19758	0.00038781	0.00108866	1.37646	0.460963
A1S3	Hordenine	165.115	539-15-1	C06199	C10H15NO	KUBCEEMXQZUPDQ-UHFFFAOYSA-N	Alkaloids	Tyrosine alkaloids	Phenylethylamines	1.18816	0.000198529	0.000609949	0.821288	-0.28404
A1X0	N6-Acetyl-L-lysine	188.116	692-04-6	C02727	C8H16N2O3	DTERQYGMUDWYAZ-ZETCQYMHSA-N	Amino acids and Peptides	Small peptides	Aminoacids	1.12668	0.00130487	0.00300038	0.796905	-0.32752
A2I4	Biochanin A	284.068	491-80-5	C00814	C16H12O5	WUADCCWRTIWANL-UHFFFAOYSA-N	Shikimates and Phenylpropanoids	Isoflavonoids	Isoflavones	1.34263	4.13716e-08	5.85692e-07	0.765045	-0.386383
A3D0	Coniferaldehyde	178.063	20649-42-7	C02666	C10H10O3	DKZBBWMURDFHNE-NSCUHMNNSA-N	Shikimates and Phenylpropanoids	Phenylpropanoids	Cinnamic acids and derivatives	1.35391	2.05706e-08	3.43171e-07	2.39239	1.25845
A3D1	trans-Ferulic acid	194.058	537-98-4	C01494	C10H10O4	KSEBMYQBYZTDHS-HWKANZROSA-N	Shikimates and Phenylpropanoids	Phenylpropanoids	Cinnamic acids and derivatives	1.27537	2.99584e-05	0.000120838	1.23131	0.30019
A3D7	2'-Deoxyinosine	252.086	890-38-0	C05512	C10H12N4O4	VGONTNSXDCQUGY-RRKCRQDMSA-N	Carbohydrates	Nucleosides	Purine nucleos(t)ides	1.13637	0.000320799	0.000930188	1.79527	0.844202
A3I5	7-Methoxycoumarin	176.047	531-59-9	C09268	C10H8O3	LIIALPBMIOVAHH-UHFFFAOYSA-N	Shikimates and Phenylpropanoids	Coumarins	Simple coumarins	1.36216	6.66039e-09	1.65821e-07	0.504665	-0.986601
A3J9	Ethyl caffeate	208.074	102-37-4		C11H12O4	WDKYDMULARNCIS-GQCTYLIASA-N	Shikimates and Phenylpropanoids	Phenylpropanoids	Cinnamic acids and derivatives	1.37421	1.00282e-06	7.31351e-06	0.319818	-1.64468
A3K9	5'-Deoxy-5'-methylthioadenosine	297.09	2457-80-9	C00170	C11H15N5O3S	WUUGFSXJNOTRMR-IOSLPCCCSA-N	Carbohydrates	Nucleosides	Purine nucleos(t)ides	1.36634	4.37929e-09	1.2161e-07	3.51547	1.81372
A3N8	Bergapten	216.042	484-20-8	C01557	C12H8O4	BGEBZHIAGXMEMV-UHFFFAOYSA-N	Shikimates and Phenylpropanoids	Coumarins	Simple coumarins	1.3357	2.14266e-07	2.11917e-06	1.34824	0.431078
A3Q2	Chrysin	254.058	480-40-0	C10028	C15H10O4	RTIXKCRFFJGDFG-UHFFFAOYSA-N	Shikimates and Phenylpropanoids	Flavonoids	Flavones	1.2645	7.20531e-05	0.000253767	1.745	0.803225
A3Q6	Apigenin	270.053	520-36-5	C01477	C15H10O5	KZNIFHPLKGYRTM-UHFFFAOYSA-N	Shikimates and Phenylpropanoids	Flavonoids	Flavones	1.21938	0.000179743	0.000559372	0.859929	-0.21771
A3R2	Quercetin	302.043	117-39-5	C00389	C15H10O7	REFJWTPEDVJJIY-UHFFFAOYSA-N	Shikimates and Phenylpropanoids	Flavonoids	Flavonols	1.36731	4.38024e-06	2.34262e-05	0.554014	-0.852006
A3T7	N6-Isopentenyladenosine	335.159	7724-76-7	C16427	C15H21N5O4	USVMJSALORZVDV-SDBHATRESA-N	Alkaloids	Pseudoalkaloids	Purine alkaloids	1.08001	0.00299152	0.00622442	0.816078	-0.29322
A3T8	Zeatin-riboside	351.154	6025-53-2	C16431	C15H21N5O5	GOSWTRUMMSCNCW-HNNGNKQASA-N	Alkaloids	Pseudoalkaloids	Purine alkaloids	1.2303	7.19233e-05	0.000253767	0.700811	-0.512902
A3V3	Rhein	284.032	478-43-3	C10401	C15H8O6	FCDLCPWAQCPTKC-UHFFFAOYSA-N	Polyketides	Polycyclic aromatic polyketides	Anthraquinones and anthrones	1.30336	0.000266721	0.000792479	0.773149	-0.371182
A3W0	Kaempferide	300.063	491-54-3	C10098	C16H12O6	SQFSKOYWJBQGKQ-UHFFFAOYSA-N	Shikimates and Phenylpropanoids	Flavonoids	Flavonols	1.18156	0.000609552	0.00156618	0.810728	-0.30271
A3W5	Imperatorin	270.089	482-44-0	C09269	C16H14O4	OLOOJGVNMBJLLR-UHFFFAOYSA-N	Shikimates and Phenylpropanoids	Coumarins	Simple coumarins	1.19659	0.000216127	0.000661203	1.12574	0.170871
A3W6	Isoimperatorin	270.089	482-45-1	C16976	C16H14O4	IGWDEVSBEKYORK-UHFFFAOYSA-N	Shikimates and Phenylpropanoids	Coumarins	Furocoumarins	1.11691	0.00145076	0.00329386	1.08877	0.122701
A3X3	Scopolin	354.095	531-44-2		C16H18O9	SGTCGCCQZOUMJJ-YMILTQATSA-N	Shikimates and Phenylpropanoids	Coumarins	Simple coumarins	1.32204	7.96446e-07	6.05299e-06	1.40514	0.490714
A3X4	Cryptochlorogenic acid	354.095	905-99-7		C16H18O9	GYFFKZTYYAFCTR-AVXJPILUSA-N	Shikimates and Phenylpropanoids	Phenylpropanoids	Cinnamic acids and derivatives	1.31472	2.03745e-06	1.22586e-05	0.724543	-0.464857
A3Y4	Loganic acid	376.137	22255-40-9		C16H24O10	JNNGEAWILNVFFD-CDJYTOATSA-N	Terpenoids	Monoterpenoids	Iridoids monoterpenoids	1.31749	1.8914e-06	1.17723e-05	0.760843	-0.394329
A3Z3	Caffeic acid phenethylester	284.105	104594-70-9	C10484	C17H16O4	SWUARLUWKZWEBQ-VQHVLOKHSA-N	Shikimates and Phenylpropanoids	Phenylpropanoids	Cinnamic acids and derivatives	1.35152	2.59665e-08	4.16618e-07	0.544947	-0.875813
A3Z8	Geniposide	388.137	24512-63-8		C17H24O10	IBFYXTRXDNAPMM-BVTMAQQCSA-N	Terpenoids	Monoterpenoids	Iridoids monoterpenoids	1.37774	1.33916e-07	1.51074e-06	0.332607	-1.58811
A3Z9	Eleutheroside B	372.142	118-34-3	C01533	C17H24O9	QJVXKWHHAMZTBY-GCPOEHJPSA-N	Terpenoids	Monoterpenoids	Menthane monoterpenoids	1.33734	3.56223e-07	3.21491e-06	1.85981	0.895152
A4E7	Bisdemethoxycurcumin	308.105	24939-16-0		C19H16O4	PREBVFJICNPEKM-YDWXAUTNSA-N	Shikimates and Phenylpropanoids	Diarylheptanoids	Linear diarylheptanoids	1.09126	0.00241342	0.0051706	1.27535	0.350889
A4H4	Demethoxycurcumin	338.115	22608-11-3		C20H18O5	HJTVQHVGMGKONQ-LUZURFALSA-N	Shikimates and Phenylpropanoids	Diarylheptanoids	Linear diarylheptanoids	1.19086	0.000559224	0.001442	1.1839	0.243544
A4T1	Astilbin	450.116	29838-67-3	C17449	C21H22O11	ZROGCCBNZBKLEL-MPRHSVQHSA-N	Shikimates and Phenylpropanoids	Flavonoids	Dihydroflavonols	1.28357	3.53936e-05	0.000138217	1.55984	0.641395
A4T2	Notopterol	354.147			C21H22O5	BKIACVAZUKISOR-MKMNVTDBSA-N	Shikimates and Phenylpropanoids	Coumarins	Furocoumarins	1.12595	0.00131009	0.0030028	1.16872	0.224934
A4T3	Nobiletin	402.131	478-01-3	C10112	C21H22O8	MRIAQLRQZPPODS-UHFFFAOYSA-N	Shikimates and Phenylpropanoids	Flavonoids	Flavones	1.24785	0.00113875	0.00266941	0.478058	-1.06474
A4Z0	Anandamide	347.282	94421-68-8	C11695	C22H37NO2	LGEQQWMQCRIYKG-DOFZRALJSA-N	Fatty acids	Fatty amides	N-acyl ethanolamines (endocannabinoids)	1.34589	1.19642e-07	1.44258e-06	1.45585	0.541866
A5A7	Schizandrin	432.215	7432-28-2	C17064	C24H32O7	YEFOAORQXAOVJQ-UHFFFAOYSA-N	Shikimates and Phenylpropanoids	Lignans	Dibenzocyclooctadienes lignans	1.07245	0.00349098	0.00714018	1.46056	0.546517
A5B0	Lovastatin	404.256	75330-75-5	C07074	C24H36O5	PCZOHLXUXFIOCF-BXMDZJJMSA-N	Polyketides	Cyclic polyketides	Monacolins and Monacolin derivatives	1.0983	0.00621809	0.0120361	1.75142	0.808522
A5F9	1-Oleoylglycerophosphocholine	522.356	19420-56-5		C26H53NO7P+	YAMUFBLWGFFICM-PTGWMXDISA-O				1.25494	4.46172e-05	0.000170442	0.748446	-0.418031
A5G6	Rutin	610.153	153-18-4	C05625	C27H30O16	IKGXIBQEEMLURG-NVPNHPEKSA-N	Shikimates and Phenylpropanoids	Flavonoids	Flavonols	1.37071	2.1173e-10	1.17592e-08	1.62202	0.697788
A5G7	Eriocitrin	596.174	13463-28-0	C09732	C27H32O15	OMQADRGFMLGFJF-MNPJBKLOSA-N	Shikimates and Phenylpropanoids	Flavonoids	Flavanones	1.36567	6.35538e-06	3.2314e-05	3.50335	1.80873
A5I6	Diosmin	608.174	520-27-4	C10039	C28H32O15	GZSOSUNBTXMUFQ-YFAPSIMESA-N	Shikimates and Phenylpropanoids	Flavonoids	Flavones	1.3325	4.78583e-07	3.97169e-06	0.773536	-0.370459
A5I8	Narcissin	624.169	604-80-8		C28H32O16	UIDGLYUNOUKLBM-GEBJFKNCSA-N	Shikimates and Phenylpropanoids	Flavonoids	Flavonols	1.15409	0.00084159	0.0020528	0.691313	-0.532589
A5V2	Ginsenoside Ro	956.498		C17543	C48H76O19	NFZYDZXHKFHPGA-QQHDHSITSA-N	Terpenoids	Triterpenoids	Oleanane triterpenoids	1.36096	1.66793e-09	5.73449e-08	0.36923	-1.43741
A6A1	3-Aminopiperidin-2-one	114.079	1892-22-4		C5H10N2O	YCCMTCQQDULIFE-UHFFFAOYSA-N	Alkaloids	Lysine alkaloids	Piperidine alkaloids	1.35696	7.91242e-08	1.00952e-06	0.457158	-1.12924
A6C8	D-Proline	115.063	344-25-2	C00763	C5H9NO2	ONIBWKKTOPOVIA-SCSAIBSYSA-N	Amino acids and Peptides	Small peptides	Aminoacids	1.36307	3.29759e-09	1.03516e-07	0.500892	-0.99743
A6Q4	Coixol	165.043	532-91-2		C8H7NO3	MKMCJLMBVKHUMS-UHFFFAOYSA-N	Alkaloids	Tryptophan alkaloids		1.06606	0.00383506	0.00779976	1.2202	0.287114
A6S1	DL-3-Phenyllactic acid	166.063	828-01-3	C01479	C9H10O3	VOXXWSYKYCBWHO-UHFFFAOYSA-N	Shikimates and Phenylpropanoids			1.21174	0.000223553	0.000678173	0.783523	-0.351953
A6S2	Syringaldehyde	182.058	134-96-3		C9H10O4	KCDXJAYRVLXPFO-UHFFFAOYSA-N	Shikimates and Phenylpropanoids	Phenolic acids	Cinnamic acids and derivatives	1.23275	1.56891e-05	6.9494e-05	0.542621	-0.881983
A6W3	Indole-3-carboxaldehyde	145.053	487-89-8	C08493	C9H7NO	OLNJUISKUQQNIM-UHFFFAOYSA-N	Alkaloids	Tryptophan alkaloids	Simple indole alkaloids	1.31472	3.36355e-06	1.89022e-05	1.44843	0.534495
A6W7	Caffeic acid	180.042	501-16-6	C01481	C9H8O4	QAIPRVGONGVQAS-DUXPYHPUSA-N	Shikimates and Phenylpropanoids	Phenylpropanoids	Cinnamic acids and derivatives	1.23117	0.000229582	0.000690658	1.56635	0.647406
A7C4	Levacecarnine	204.124	5080-50-2		C9H18NO4+	RDHQFKQIGNGIED-MRVPVSSYSA-O				1.00099	0.00688369	0.0130105	0.863407	-0.211888
A7E4	Alisol B 23-acetate	514.366			C32H50O5	NLOAQXKIIGTTRE-JSWHPQHOSA-N	Terpenoids	Triterpenoids	Dammarane and Protostane triterpenoids	1.30492	6.25687e-06	3.20387e-05	0.503774	-0.989152
A7J1	N-Acetylglycine	117.043	543-24-8		C4H7NO3	OKJIRPAQVSHGFK-UHFFFAOYSA-N	Amino acids and Peptides	Small peptides	Aminoacids	1.23448	0.000705762	0.00178168	0.836395	-0.257744
A7K8	Methyl hippurate	193.074	1205-08-9		C10H11NO3	XTKVNQKOTKPCKM-UHFFFAOYSA-N	Alkaloids	Peptide alkaloids	Simple amide alkaloids	1.16979	0.000462129	0.00124499	1.27689	0.352635
A7R2	4'-Hydroxyacetophenone	136.052	99-93-4		C8H8O2	TXFPEBPIARQUIG-UHFFFAOYSA-N	Shikimates and Phenylpropanoids			1.15893	0.000553315	0.00143188	0.815237	-0.294708
A7U2	Eugenin	206.058	480-34-2	C20210	C11H10O4	SUTUBQHKZRNZRA-UHFFFAOYSA-N	Polyketides	Chromanes	Chromones	1.28584	1.79546e-05	7.85648e-05	0.83241	-0.264635
A7Y6	Picein	298.105	530-14-3		C14H18O7	GOZCEKPKECLKNO-RKQHYHRCSA-N				1.34208	1.24303e-07	1.47126e-06	0.667633	-0.582874
A8A2	gamma-Glutamylphenylalanine	294.122	7432-24-8		C14H18N2O5	XHHOHZPNYFQJKL-QWRGUYRKSA-N	Amino acids and Peptides	Small peptides	Dipeptides	1.11376	0.00156014	0.0034982	1.20968	0.274626
A8A4	2-Hydroxyethanesulfonic acid	125.999	107-36-8	C05123	C2H6O4S	SUMDYPCJJOFFON-UHFFFAOYSA-N				1.34448	1.4845e-07	1.62396e-06	1.8869	0.916016
A8H3	DL-Tryptophan	204.09	54-12-6	C00806	C11H12N2O2	QIVBCDIJIAJPQS-UHFFFAOYSA-N	Amino acids and Peptides	Small peptides	Aminoacids	1.24168	7.19144e-05	0.000253767	0.829454	-0.269766
A8H4	Lumichrome	242.08	1086-80-2	C01727	C12H10N4O2	ZJTJUVIJVLLGSP-UHFFFAOYSA-N	Alkaloids	Pseudoalkaloids	pteridine alkaloids	1.07497	0.00332823	0.0068461	1.35649	0.439882
A8I2	Vincamine	354.194	1617-90-9		C21H26N2O3	RXPRRQLKFXBCSJ-GIVPXCGWSA-N	Alkaloids	Tryptophan alkaloids	Aspidosperma-Iboga hybrid type (Vinca alkaloids)	1.25839	6.99184e-05	0.00025115	0.58401	-0.775934
A8O9	Vinblastine	810.42	143-67-9	C07201	C46H58N4O9	JXLYSJRDGCGARV-XQKSVPLYSA-N	Alkaloids	Tryptophan alkaloids	Aspidosperma type	1.15107	0.000219453	0.000668546	0.463433	-1.10957
A8P2	Chelidonine	353.126	476-32-4		C20H19NO5	GHKISGDRQRSCII-ZOCIIQOWSA-N	Alkaloids	Tyrosine alkaloids	Isoquinoline alkaloids	1.2414	0.000107973	0.000364284	0.552741	-0.855324
A8Q3	4-Methyl-5-thiazoleethanol	143.04	137-00-8	C04294	C6H9NOS	BKAWJIRCKVUVED-UHFFFAOYSA-N	Alkaloids	Serine alkaloids	Thiazole alkaloids	1.21721	7.47739e-05	0.000260806	0.75707	-0.401502
A8T3	1-methylguanosine	297.107	2140-65-0	C04545	C11H15N5O5	UTAIYTHAJQNQDW-KQYNXXCUSA-N	Carbohydrates	Nucleosides	Purine nucleos(t)ides	1.33868	2.18327e-07	2.13017e-06	1.47423	0.559961
A8Y9	Arecaidine	141.079	499-04-7	C10128	C7H11NO2	DNJFTXKSFAMXQF-UHFFFAOYSA-N	Alkaloids			1.31727	2.43412e-06	1.44052e-05	0.822037	-0.282724
A9D6	Magnoflorine	342.171	6681-18-1		C20H24NO4+	YLRXAIKMLINXQY-ZDUSSCGKSA-O				1.20394	0.000193827	0.000598048	0.593143	-0.753548
A9G4	Glaucine	355.178	475-81-0		C21H25NO4	RUZIUYOSRDWYQF-HNNXBMFYSA-N	Alkaloids	Tyrosine alkaloids	Aporphine alkaloids	1.0817	0.00262882	0.00559884	0.695177	-0.524547
A9N0	Santonin	246.126	481-06-1		C15H18O3	XJHDMGJURBVLLE-BOCCBSBMSA-N	Terpenoids	Sesquiterpenoids	Eudesmane sesquiterpenoids	1.35977	3.40345e-06	1.89022e-05	1.54251	0.625278
B1O4	N-Acetyl-L-glutamic acid	189.064	1188-37-0	C00624	C7H11NO5	RFMMMVDNIPUKGG-YFKPBYRVSA-N	Amino acids and Peptides	Small peptides	Dipeptides	1.32921	4.63194e-07	3.93442e-06	0.689027	-0.537367
B1Q8	Bergaptol	202.027	486-60-2	C00758	C11H6O4	GIJHDGJRTUSBJR-UHFFFAOYSA-N	Shikimates and Phenylpropanoids	Coumarins	Simple coumarins	1.353	1.46482e-08	2.79881e-07	1.50034	0.585285
B1X3	Isopimpinellin	246.053	482-27-9	C02162	C13H10O5	DFMAXQKDIGCMTL-UHFFFAOYSA-N	Shikimates and Phenylpropanoids	Coumarins	Furocoumarins	1.35968	4.28218e-09	1.2161e-07	1.53732	0.620414
B1Z8	(S)-Abscisic acid	264.136	7773-56-0	C06082	C15H20O4	JLIDBLDQVAYHNE-IBPUIESWSA-N	Terpenoids	Apocarotenoids	Apocarotenoids(ε-)	1.32359	1.98702e-06	1.22071e-05	1.55207	0.63419
B2J4	Melilotoside	326.1	618-67-7	C05158	C15H18O8	GVRIYIMNJGULCZ-ZMKUSUEASA-N	Shikimates and Phenylpropanoids	Phenylpropanoids	Cinnamic acids and derivatives	1.37937	5.24054e-07	4.25131e-06	0.058512	-4.09512
B2L6	5-Caffeoylshikimic acid	336.085	73263-62-4	C10434	C16H16O8	QMPHZIPNNJOWQI-GDDAOPKQSA-N	Shikimates and Phenylpropanoids	Phenylpropanoids	Cinnamic acids and derivatives	1.33507	2.86282e-05	0.000117441	1.71285	0.7764
B2N7	Thiamine monophosphate	345.079	273724-21-3	C01081	C12H18N4O4PS+	HZSAJDVWZRBGIF-UHFFFAOYSA-O				1.35944	2.09134e-08	3.43171e-07	0.689515	-0.536347
B2P1	Matairesinol	358.142	580-72-3	C10682	C20H22O6	MATGKVZWFZHCLI-LSDHHAIUSA-N	Shikimates and Phenylpropanoids	Lignans	Dibenzylbutyrolactone lignans	1.29992	0.000227655	0.000687729	1.36992	0.454092
B2U5	Solasodine	413.329	126-17-0	C10822	C27H43NO2	KWVISVAMQJWJSZ-UHFFFAOYSA-N	Alkaloids	Pseudoalkaloids	Steroidal alkaloids	1.23934	6.42186e-05	0.000232318	1.33732	0.419347
B3R8	licochalcone C	338.152	144506-14-9		C21H22O4	WBDNTJSRHDSPSR-KPKJPENVSA-N	Shikimates and Phenylpropanoids	Flavonoids	Chalcones	1.20342	0.00344588	0.00706798	1.32332	0.404162
B3T3	Irigenin	360.085		C17957	C18H16O8	TUGWPJJTQNLKCL-UHFFFAOYSA-N	Shikimates and Phenylpropanoids	Isoflavonoids	Isoflavones	1.249	0.000822282	0.0020125	1.564	0.645241
B3U4	Dimethylfraxetin	236.068	6035-49-0		C12H12O5	RAYQKHLZHPFYEJ-UHFFFAOYSA-N	Shikimates and Phenylpropanoids	Coumarins	Simple coumarins	1.37686	2.69381e-07	2.52588e-06	4.03738	2.01342
B3U6	Fraxinol	222.053	486-28-2		C11H10O5	PBPNOAHYDPHKFH-UHFFFAOYSA-N	Shikimates and Phenylpropanoids	Coumarins	Simple coumarins	1.33303	2.06631e-07	2.07205e-06	1.78609	0.836805
B4B1	Dalbergin	268.074	482-83-7	C10414	C16H12O4	AZELSOYQOIUPBZ-UHFFFAOYSA-N	Shikimates and Phenylpropanoids	Flavonoids	Neoflavonoids	1.26889	6.32996e-08	8.46339e-07	15.2955	3.93503
B4E8	3',4'-Dimethoxyflavone	282.089	4143-62-8		C17H14O4	ZGHORMOOTZTQFL-UHFFFAOYSA-N	Shikimates and Phenylpropanoids	Flavonoids	Flavones	1.17304	0.00041847	0.00115319	0.836079	-0.258288
B4J4	7-Prenyloxycoumarin	230.094			C14H14O3	SMHJTSOVVRGDEO-UHFFFAOYSA-N	Shikimates and Phenylpropanoids	Coumarins	Simple coumarins	1.25545	1.53815e-05	6.85519e-05	1.56991	0.650684
B4L2	Demethylsuberosin	230.094		C18083	C14H14O3	FIDUIAPDSKSUGO-UHFFFAOYSA-N	Shikimates and Phenylpropanoids	Coumarins	Simple coumarins	1.28527	1.85265e-05	8.05791e-05	1.2613	0.334915
B4R9	Apigenin-7-O-rutinoside	578.164	552-57-8		C27H30O14	FKIYLTVJPDLUDL-UHFFFAOYSA-N	Shikimates and Phenylpropanoids	Flavonoids	Flavones	1.31754	2.00316e-06	1.22071e-05	1.3666	0.450594
B4T9	Asatone	448.21	38451-63-7		C24H32O8	XBKKBTPYPCCCKA-UHFFFAOYSA-N	Shikimates and Phenylpropanoids	Lignans	Neolignans	1.18326	0.000236949	0.000709865	1.59315	0.671882
B4V1	Hispidulin	300.063	1447-88-7		C16H12O6	IHFBPDAQLQOCBX-UHFFFAOYSA-N	Shikimates and Phenylpropanoids	Flavonoids	Flavones	1.28017	7.58894e-06	3.72736e-05	0.714649	-0.484694
B4W6	Retusine	358.105	480-86-4		C19H18O7	HHGPYJLEJGNWJA-UHFFFAOYSA-N	Shikimates and Phenylpropanoids	Flavonoids	Flavonols	1.35371	5.64047e-09	1.45443e-07	2.76492	1.46724
B4Z5	Daphnoretin	352.058		C09216	C19H12O7	JRHMMVBOTXEHGJ-UHFFFAOYSA-N	Shikimates and Phenylpropanoids	Coumarins	Simple coumarins	1.36241	9.54757e-10	4.05491e-08	2.58989	1.37289
B5A4	suberosin	244.11			C15H16O3	RSZDAYHEZSRVHS-UHFFFAOYSA-N	Shikimates and Phenylpropanoids	Coumarins	Simple coumarins	1.28317	8.86605e-06	4.23927e-05	0.808731	-0.306269
B5B8	6-Demethoxytangeretin	342.11			C19H18O6	DDGJUTBQQURRGE-UHFFFAOYSA-N	Shikimates and Phenylpropanoids	Flavonoids	Flavones	1.02048	0.00451691	0.00907271	0.707419	-0.499364
B5D4	Heptamethoxyflavone	432.142	1178-24-1		C22H24O9	SSXJHQZOHUYEGD-UHFFFAOYSA-N	Shikimates and Phenylpropanoids	Flavonoids	Flavonols	1.21475	0.000191081	0.000592106	0.537809	-0.894833
B5E6	Isomeramazin	260.105			C15H16O4	OMOYQLRHKFGVGN-UHFFFAOYSA-N	Shikimates and Phenylpropanoids	Coumarins	Simple coumarins	1.23531	3.49504e-05	0.000137892	0.76925	-0.378475
B5N3	Kaempferol 3-methyl ether	300.063	1592-70-7		C16H12O6	VJJZJBUCDWKPLC-UHFFFAOYSA-N	Shikimates and Phenylpropanoids	Flavonoids	Flavonols	1.36127	1.91394e-09	6.28119e-08	0.673791	-0.569628
B5Q7	Viscidulin I	302.043	92519-95-4		C15H10O7	NULZZCUABWZIRV-UHFFFAOYSA-N	Shikimates and Phenylpropanoids	Flavonoids	Flavonols	1.28887	0.00050958	0.00135763	2.32535	1.21745
B5W1	Riboflavin	376.138	83-88-5	C00255	C17H20N4O6	AUNGANRZJHBGPY-UHFFFAOYSA-N	Alkaloids	Pseudoalkaloids	pteridine alkaloids	1.318	4.96542e-06	2.61681e-05	1.83592	0.876503
B6L0	N-Methylnicotinic acid	138.056	6138-41-6		C7H8NO2+	WWNNZCOKKKDOPX-UHFFFAOYSA-O				1.09454	0.00198846	0.00433736	0.816147	-0.2931
B6P5	Ac-DL-Trp-OH	246.1	87-32-1		C13H14N2O3	DZTHIGRZJZPRDV-UHFFFAOYSA-N	Amino acids and Peptides	Small peptides	Dipeptides	1.10775	0.000382632	0.00108219	1.55705	0.638812
B7H4	Lauroylcarnitine	343.272	25518-54-1		C19H37NO4	FUJLYHJROOYKRA-QGZVFWFLSA-O				1.23479	7.82732e-05	0.000271698	1.27937	0.355435
B7O7	Ceforanide	519.099	60925-61-3	C06884	C20H21N7O6S2	SLAYUXIURFNXPG-CRAIPNDOSA-N	Amino acids and Peptides	β-lactams	Cephalosporins	1.15978	0.00113583	0.00266941	0.704464	-0.505401
B7S7	Myristoylcarnitine	371.304	25597-07-3		C21H41NO4	PSHXNVGSVNEJBD-LJQANCHMSA-O				1.04693	0.00823556	0.0152855	1.37272	0.457034
B7T6	1-Myristoyl-sn-glycero-3-phosphocholine (LPC(14:0/0:0))	467.301	20559-16-4		C22H46NO7P	VXUOFDJKYGDUJI-OAQYLSRUSA-O				1.23018	0.000109584	0.000366294	1.26745	0.341927
B7U0	Disulfiram	296.051	97-77-8	C01692	C10H20N2S4	AUZONCFQVSMFAP-UHFFFAOYSA-N				1.03016	0.00575643	0.0112025	1.39478	0.480036
B7U3	Midecamycin	813.451	35457-80-8		C41H67NO15	DMUAPQTXSSNEDD-LDWAKBATSA-N	Polyketides	Macrolides	Erythromycins	1.12017	0.00134124	0.00306448	1.59378	0.672453
B8P7	Zingibroside R1	794.445	80930-74-1		C42H66O14	WJQOMUVKRDJBGZ-COUNGWPASA-N	Terpenoids	Triterpenoids	Oleanane triterpenoids	1.37147	1.18956e-06	8.50356e-06	0.267375	-1.90306
B8R1	2,6-Diamino-5-hydroxyhexanoic acid	162.1	13204-98-3		C6H14N2O3	YSMODUONRAFBET-UHFFFAOYSA-N	Amino acids and Peptides	Small peptides	Aminoacids	1.0057	0.00741495	0.0139054	0.82741	-0.273326
B8S8	Pinoresinol Diglucoside	682.247	63902-38-5		C32H42O16	ZJSJQWDXAYNLNS-FUPWJLLWSA-N	Shikimates and Phenylpropanoids	Lignans	Furofuranoid lignans	1.37506	8.86108e-06	4.23927e-05	0.213493	-2.22774
B8Y4	Tomatidine	415.345	77-59-8	C10826	C27H45NO2	XYNPYHXGMWJBLV-VXPJTDKGSA-N	Alkaloids	Pseudoalkaloids	Steroidal alkaloids	1.0977	0.00111285	0.00262575	1.36887	0.452986
B9K6	Apigenin-7-O-(2G-rhamnosyl)gentiobioside	740.216	174284-20-9		C33H40O19	LXOPDILLGIDKLW-KDGNLIIISA-N	Shikimates and Phenylpropanoids	Flavonoids	Flavones	1.11123	0.00159117	0.00353484	1.60794	0.685209
B9L1	Calenduloside F	794.445	51415-02-2		C42H66O14	YOSRLTNUOCHBEA-SGVKAIFKSA-N	Terpenoids	Triterpenoids	Oleanane triterpenoids	1.34944	3.02474e-08	4.74753e-07	0.522658	-0.93606
B9Q6	DL-Glutamine	146.069	585-21-7		C5H10N2O3	ZDXPYRJPNDTMRX-UHFFFAOYSA-N	Amino acids and Peptides	Small peptides	Aminoacids	1.31724	1.74641e-06	1.10606e-05	1.26636	0.340686
C0G3	Narirutin	580.179	14259-46-2	C09793	C27H32O14	HXTFHSYLYXVTHC-AJHDJQPGSA-N	Shikimates and Phenylpropanoids	Flavonoids	Flavanones	1.3734	1.38717e-10	9.08846e-09	3.49515	1.80535
C0J7	Quercetin 3-gentiobioside	626.148	117-39-5		C27H30O17	FDRQPMVGJOQVTL-DEFKTLOSSA-N	Shikimates and Phenylpropanoids	Flavonoids	Flavonols	1.20417	0.000162738	0.000519898	1.93805	0.954602
C0L2	Atrazine	215.094	1912-24-9	C06551	C8H14ClN5	MXWJVTOOROXGIU-UHFFFAOYSA-N	Alkaloids	Pseudoalkaloids	Purine alkaloids	1.29324	3.25901e-06	1.86746e-05	1.48207	0.567614
C1I1	1,5-Dicaffeoylquinic acid	516.127	30964-13-7	C10445	C25H24O12	YDDUMTOHNYZQPO-GCBRTHAASA-N	Shikimates and Phenylpropanoids	Phenylpropanoids	Cinnamic acids and derivatives	1.26015	2.9353e-05	0.000119061	0.683424	-0.549146
C1I4	Aminopicoline	108.069	695-34-1		C6H8N2	ORLGLBZRQYOWNA-UHFFFAOYSA-N	Alkaloids	Nicotinic acid alkaloids	Pyridine alkaloids	1.18244	0.000546476	0.00142955	0.742776	-0.429001
C1N3	Citropten	206.058	487-06-9		C11H10O4	NXJCRELRQHZBQA-UHFFFAOYSA-N	Shikimates and Phenylpropanoids	Coumarins	Simple coumarins	1.32616	4.34471e-05	0.000166855	0.802329	-0.317735
C1N4	Neoamygdalin	457.158	29883-16-7		C20H27NO11	XUCIJNAGGSZNQT-UUGBRMIUSA-N				1.22163	0.000176898	0.000555307	1.28391	0.360545
C1O0	Sophoraflavanone G	424.189			C25H28O6	XRYVAQQLDYTHCL-CMJOXMDJSA-N	Shikimates and Phenylpropanoids	Flavonoids	Flavanones	1.10368	0.00721346	0.0135628	1.49833	0.583351
C1O1	Calceolarioside B	478.148	105471-98-5		C23H26O11	LFKQVVDFNHDYNK-FOXCETOMSA-N	Shikimates and Phenylpropanoids	Phenylpropanoids	Cinnamic acids and derivatives	1.18129	8.08015e-05	0.000279133	0.482281	-1.05205
C2H3	Nodakenin	408.142	495-31-8		C20H24O9	HXCGUCZXPFBNRD-DNLMCPORSA-N	Shikimates and Phenylpropanoids	Coumarins	Furocoumarins	1.37497	1.42031e-11	2.05714e-09	1.40362	0.489156
C3C0	3-ACETYL-11-KETO-beta-BOSWELLIC ACID	512.35	67416-61-9		C32H48O5	HMMGKOVEOFBCAU-BCDBGHSCSA-N	Terpenoids	Triterpenoids	Serratane triterpenoids	1.00084	0.00837959	0.015513	1.27614	0.351781
C3F8	Pimpinellin	246.053	131-12-4	C09285	C13H10O5	BQPRWZCEKZLBHL-UHFFFAOYSA-N	Shikimates and Phenylpropanoids	Coumarins	Furocoumarins	1.35977	1.57312e-08	2.91229e-07	1.66716	0.737397
C3Q0	Mevastatin	390.241	73573-88-3		C23H34O5	AJLFOPYRIVGYMJ-INTXDZFKSA-N	Polyketides	Cyclic polyketides	Monacolins and Monacolin derivatives	1.30837	1.45857e-06	9.66132e-06	1.59501	0.673567
C3S8	Peimisine	427.309			C27H41NO3	KYELXPJVGNZIGC-GKFGJCLESA-N	Alkaloids	Pseudoalkaloids	Steroidal alkaloids	1.10229	0.00220952	0.00474784	1.14539	0.195834
C3S9	Artesunate	384.178	88495-63-0		C19H28O8	FIHJKUPKCHIPAT-NKHDUEHSSA-N	Terpenoids	Sesquiterpenoids	Arteminisin	1.15756	0.000985757	0.00236451	1.69486	0.761164
C3U1	Choerospondin	434.121	81202-36-0		C21H22O10	KSDSYIXRWHRPMN-SFTVRKLSSA-N	Shikimates and Phenylpropanoids	Flavonoids	Flavanones	1.24187	0.00010495	0.000355746	1.47658	0.562264
C3V7	Atranorin	374.1	479-20-9		C19H18O8	YLOYKYXNDHOHHT-UHFFFAOYSA-N	Polyketides	Aromatic polyketides	Depsides	1.26623	2.28742e-05	9.71479e-05	1.48207	0.567617
C3X0	Kaempferol 3-O-gentiobioside	610.153	22149-35-5		C27H30O16	BITPRCODIALMOV-DEFKTLOSSA-N	Shikimates and Phenylpropanoids	Flavonoids	Flavonols	1.20446	0.00051193	0.00135887	0.677181	-0.562386
C3X9	3-Hydroxycoumarin	162.032	939-19-5		C9H6O3	MJKVTPMWOKAVMS-UHFFFAOYSA-N	Shikimates and Phenylpropanoids	Coumarins	Simple coumarins	1.38124	4.74859e-07	3.97169e-06	0.00149934	-9.38145
C3Z0	Neodiosmin	608.174	38665-01-9		C28H32O15	VCCNKWWXYVWTLT-CYZBKYQRSA-N	Shikimates and Phenylpropanoids	Flavonoids	Flavones	1.34415	1.19882e-07	1.44258e-06	0.76266	-0.390888
C4A9	Barlerin	448.158	57420-46-9		C19H28O12	ARFRZOLTIRQFCI-NGQYDJQZSA-N	Terpenoids	Monoterpenoids	Iridoids monoterpenoids	1.14266	0.000800707	0.00197053	0.809209	-0.305415
C4F6	Spiramide	383.201	510-74-7		C22H26FN3O2	FJUKDAZEABGEIH-UHFFFAOYSA-N	Alkaloids	Tryptophan alkaloids	Carboline alkaloids	1.24515	7.20584e-06	3.58801e-05	0.0774568	-3.69046
C4I1	Trilobatin	436.137	4192-90-9		C21H24O10	GSTCPEBQYSOEHV-QNDFHXLGSA-N	Shikimates and Phenylpropanoids	Flavonoids	Chalcones	1.35071	5.13431e-09	1.37295e-07	0.232804	-2.10281
C4O6	Rhapontin	420.142	155-58-8	C10288	C21H24O9	GKAJCVFOJGXVIA-DXKBKAGUSA-N	Shikimates and Phenylpropanoids	Stilbenoids	Monomeric stilbenes	1.17048	0.000704758	0.00178168	0.671897	-0.573688
C4Q4	Isochlorogenic acid A	516.127	2450-53-5		C25H24O12	KRZBCHWVBQOTNZ-RDJMKVHDSA-N	Shikimates and Phenylpropanoids	Phenylpropanoids	Cinnamic acids and derivatives	1.13231	0.0010152	0.00242708	1.35333	0.436515
C4R9	2-Aminoquinoline	144.069	580-22-3		C9H8N2	GCMNJUJAKQGROZ-UHFFFAOYSA-N	Alkaloids	Anthranilic acid alkaloids	Quinazoline alkaloids	1.08992	0.00212835	0.00458707	0.847222	-0.239189
C4U1	11-Keto-beta-boswellic acid	470.34	17019-92-0		C30H46O4	YIMHGPSYDOGBPI-IQQSWPBXSA-N	Terpenoids	Triterpenoids	Ursane and Taraxastane triterpenoids	1.00898	0.00441882	0.00893666	0.690719	-0.533829
C4Y2	Propylparaben	180.079	94-13-3		C10H12O3	QELSKZZBTMNZEB-UHFFFAOYSA-N	Shikimates and Phenylpropanoids	Phenolic acids	Shikimic acids and derivatives	1.18869	0.000166819	0.000530587	0.592412	-0.755327
C5E2	Secoxyloganin	404.132	58822-47-2		C17H24O11	MQLSOVRLZHTATK-PEYNGXJCSA-N	Terpenoids	Monoterpenoids	Secoiridoid monoterpenoids	1.13799	0.000872401	0.00212079	0.785782	-0.347799
C5G9	6'-O-beta-D-Glucosylgentiopicroside	518.164	115713-06-9		C22H30O14	BERNCPGDRADLCG-KEXDUYRESA-N	Terpenoids	Monoterpenoids	Secoiridoid monoterpenoids	1.16332	0.000549283	0.00143171	1.55382	0.63582
C5L8	Oxypeucedanin hydrate	304.095	133164-11-1		C16H16O6	PEWFWDOPJISUOK-CYBMUJFWSA-N	Shikimates and Phenylpropanoids	Coumarins	Furocoumarins	1.29716	2.83601e-06	1.65129e-05	2.19061	1.13133
C5P6	Homoplantaginin	462.116	17680-84-1		C22H22O11	GCLAFEGUXXHIFT-IWLDQSELSA-N	Shikimates and Phenylpropanoids	Flavonoids	Flavones	1.18647	0.000395857	0.00109505	0.780794	-0.356986
C5S0	Puerarin 6''-O-Xyloside	548.153	114240-18-5		C26H28O13	YCFQXQCEEPCZMO-KATYHMCLSA-N	Shikimates and Phenylpropanoids	Isoflavonoids	Isoflavones	1.10701	0.00150262	0.00337973	0.557213	-0.8437
C5U6	Dimethyl phthalate	194.058	131-11-3	C11233	C10H10O4	NIQCNGHVCWTJSM-UHFFFAOYSA-N	Shikimates and Phenylpropanoids	Phenolic acids	Simple phenolic acids	1.36431	1.3308e-05	6.08124e-05	0.240687	-2.05477
C6B4	Nodakenetin	246.089	495-32-9	C09278	C14H14O4	FWYSBEAFFPBAQU-GFCCVEGCSA-N	Shikimates and Phenylpropanoids	Coumarins	Simple coumarins	1.32701	6.98587e-07	5.42344e-06	1.5444	0.627042
C6D8	Elemicin	208.11	487-11-6	C10451	C12H16O3	BPLQKQKXWHCZSS-UHFFFAOYSA-N	Shikimates and Phenylpropanoids	Phenylpropanoids	Cinnamic acids and derivatives	1.37	1.18731e-09	4.76242e-08	2.57577	1.365
C6H5	Saikogenin F	472.355	14356-59-3		C30H48O4	IUBQSOTVBGNWDI-CUMBFETHSA-N	Terpenoids	Triterpenoids	Oleanane triterpenoids	1.05388	0.00323045	0.00668306	1.58715	0.666441
C6N2	Abscisic acid	264.136	14375-45-2		C15H20O4	JLIDBLDQVAYHNE-OAHLLOKOSA-N	Terpenoids	Apocarotenoids	Apocarotenoids(ε-)	1.3575	1.04115e-08	2.2779e-07	2.67351	1.41874
C6R4	1-Naphthalenemethanol	158.073	4780-79-4	C14089	C11H10O	PBLNHHSDYFYZNC-UHFFFAOYSA-N	Shikimates and Phenylpropanoids			1.11383	0.00188444	0.00413547	0.833327	-0.263045
C6R5	Harpagide	364.137	6926-08-5		C15H24O10	XUWSHXDEJOOIND-YYDKPPGPSA-N	Terpenoids	Monoterpenoids	Iridoids monoterpenoids	1.18842	0.000395519	0.00109505	0.659501	-0.600553
C6T2	Tetradehydropodophyllotoxin	410.1	42123-27-3		C22H18O8	HSSDVCMYTACNSM-UHFFFAOYSA-N	Shikimates and Phenylpropanoids	Lignans	Arylnaphthalene and aryltetralin lignans	1.24461	0.000132833	0.000432006	0.694104	-0.526777
C7L6	Lincomycin	406.214	7179-49-9		C18H34N2O6S	OJMMVQQUTAEWLP-KIDUDLJLSA-N	Carbohydrates	Aminosugars and aminoglycosides	Aminoglycosides	1.36245	1.16117e-08	2.40935e-07	0.58052	-0.784582
C7Q0	Kahweol	314.188	6894-43-5		C20H26O3	JEKMKNDURXDJAD-HWUKTEKMSA-N	Terpenoids	Diterpenoids	Tetracyclic diterpenoids	1.30303	0.000143368	0.000462106	0.609556	-0.714168
C7Y6	Polygodial	234.162	6754-20-7		C15H22O2	AZJUJOFIHHNCSV-KCQAQPDRSA-N	Terpenoids	Sesquiterpenoids	Drimane sesquiterpenoids	1.25074	3.32283e-05	0.000132546	0.448092	-1.15813
C8D9	Toddalolactone	308.126	483-90-9		C16H20O6	GLWPLQBQHWYKRK-CYBMUJFWSA-N	Shikimates and Phenylpropanoids	Coumarins	Simple coumarins	1.21879	0.00496761	0.00988047	1.64315	0.716467
C8F6	Isoscopoletin	192.042	776-86-3		C10H8O4	SYTYLPHCLSSCOJ-UHFFFAOYSA-N	Shikimates and Phenylpropanoids	Coumarins	Simple coumarins	1.35478	1.16797e-08	2.40935e-07	0.620746	-0.687925
C8G5	Phellopterin	300.1		C17047	C17H16O5	BMLZFLQMBMYVHG-UHFFFAOYSA-N	Shikimates and Phenylpropanoids	Coumarins	Furocoumarins	1.27545	0.000878339	0.00212806	0.451108	-1.14845
C8J8	Kushenol I	438.168	99119-69-4		C25H26O7	WAAPHYJTKSTXSX-CQSZACIVSA-N	Shikimates and Phenylpropanoids	Flavonoids	Flavonols	1.35028	1.95224e-08	3.35599e-07	2.00551	1.00397
C8J9	Methyl vanillate	182.058	3943-74-6		C9H10O4	BVWTXUYLKBHMOX-UHFFFAOYSA-N	Shikimates and Phenylpropanoids	Phenolic acids	Simple phenolic acids	1.15086	0.000628087	0.00160808	1.23291	0.302069
C8N4	13,21-Dihydroeurycomanone	410.158	129587-06-0		C20H26O9	PKICXNXDFYYYGH-QWRBDCSPSA-N	Terpenoids	Triterpenoids	Quassinoids	1.0263	0.0067027	0.0127818	0.795902	-0.329338
C8W0	Pteryxin	386.137	13161-75-6		C21H22O7	LYUZYPKZQDYMEE-YRCPKEQFSA-N	Shikimates and Phenylpropanoids	Coumarins	Simple coumarins	1.26711	7.3408e-06	3.63018e-05	2.45052	1.29309
C9D7	Phillygenin	372.157	487-39-8		C21H24O6	CPJKKWDCUOOTEW-YJPXFSGGSA-N	Shikimates and Phenylpropanoids	Lignans	Furofuranoid lignans	1.28628	0.000269855	0.000798506	1.40078	0.486234
C9G5	6-Hydroxycoumarin	162.032	6093-68-1		C9H6O3	CJIJXIFQYOPWTF-UHFFFAOYSA-N	Shikimates and Phenylpropanoids	Coumarins	Simple coumarins	1.11738	0.00127226	0.00294413	1.57278	0.653321
C9K1	Pterosin B	218.131	29774-74-1		C14H18O2	SJNCSXMTBXDZQA-SECBINFHSA-N	Terpenoids	Sesquiterpenoids	Illudalane sesquiterpenoids	1.22533	0.000108584	0.000364641	1.35276	0.435909
C9N7	Licarin B	324.136	51020-87-2		C20H20O4	DMMQXURQRMNSBM-UHFFFAOYSA-N	Shikimates and Phenylpropanoids	Lignans	Neolignans	1.36898	1.22552e-10	8.84825e-09	0.292097	-1.77548
C9R1	Kifunensine	232.07	109944-15-2		C8H12N2O6	OIURYJWYVIAOCW-PQMKYFCFSA-N	Carbohydrates			1.13691	0.00135184	0.00307895	0.779707	-0.358996
C9W2	Decursin	328.131	5928-25-6		C19H20O5	CUKSFECWKQBVED-INIZCTEOSA-N	Shikimates and Phenylpropanoids	Coumarins	Simple coumarins	1.08285	0.000355355	0.00101812	1.60222	0.680071
C9X6	Praeruptorin A	386.137	73069-25-7		C21H22O7	XGPBRZDOJDLKOT-YRCPKEQFSA-N	Shikimates and Phenylpropanoids	Coumarins	Simple coumarins	1.12704	5.83364e-05	0.000213801	1.90684	0.931185
D0A3	2-(2-Phenylethyl)chromone	250.099	61828-53-3		C17H14O2	VNZNWFQJBFLELF-UHFFFAOYSA-N	Polyketides	Chromanes	Chromones	1.32676	1.55655e-06	1.00342e-05	0.373456	-1.42099
D0B3	Decursinol	246.089	23458-02-8		C14H14O4	BGXFQDFSVDZUIW-LBPRGKRZSA-N	Shikimates and Phenylpropanoids	Coumarins	Simple coumarins	1.32701	6.98587e-07	5.42344e-06	1.5444	0.627042
D0B8	Sterigmatocystine	324.063	10048-13-2		C18H12O6	UTSVPXMQSFGQTM-DCXZOGHSSA-N	Polyketides	Xanthones	Aflatoxins	1.07359	0.00209392	0.00452637	0.758359	-0.399047
D0C3	2,6-Dimethoxy-1,4-benzoquinone	168.042	530-55-2	C10331	C8H8O4	OLBNOBQOQZRLMP-UHFFFAOYSA-N	Polyketides	Aromatic polyketides	Benzoquinones	1.25699	2.84897e-05	0.000117441	1.48462	0.570095
D0C6	N-Formylcytisine	218.106	53007-06-0		C12H14N2O2	PCYQRXYBKKZUSR-VHSXEESVSA-N	Alkaloids	Lysine alkaloids	Pyridine alkaloids	1.00502	0.0127143	0.0224994	3.15682	1.65847
D0F3	Regaloside C	416.132	117591-85-2		C18H24O11	DVLNCWXFKKSRQB-NSVVQGBUSA-N	Shikimates and Phenylpropanoids	Phenylpropanoids	Cinnamic acids and derivatives	1.11822	0.00160355	0.00355141	1.61227	0.689092
D0K3	H-Trp-NH2.HCl	203.106	5022-65-1		C11H13N3O	JLSKPBDKNIXMBS-VIFPVBQESA-N	Amino acids and Peptides	Small peptides	Dipeptides	1.13718	0.00452379	0.00907271	0.810681	-0.302795
D0U0	Ethyl ferulate	222.089	4046-02-0		C12H14O4	ATJVZXXHKSYELS-FNORWQNLSA-N	Shikimates and Phenylpropanoids	Phenylpropanoids	Cinnamic acids and derivatives	1.37594	4.27626e-12	1.54373e-09	0.713828	-0.486352
D1B0	Lindenenol	230.131	26146-27-0		C15H18O2	XRDJYSVGPBJZSG-PSDLAXTLSA-N	Terpenoids	Sesquiterpenoids	Cycloeudesmane sesquiterpenoids	1.1336	0.00145628	0.00329603	1.24066	0.311104
D1D3	Corylifol A	390.183	775351-88-7		C25H26O4	ZBHUUXLHDOUMKM-REZTVBANSA-N	Shikimates and Phenylpropanoids	Isoflavonoids	Isoflavones	1.33986	3.74573e-07	3.29807e-06	1.78316	0.834434
D1E1	Nigakinone	266.069	18110-86-6	C16996	C15H10N2O3	PGFKZUOYIFDMQJ-UHFFFAOYSA-N	Alkaloids	Tryptophan alkaloids	Carboline alkaloids	1.35451	1.47306e-08	2.79881e-07	2.45942	1.29832
D1E6	Niazinin	343.109	147821-57-6		C15H21NO6S	ZOIAMMQYAZSWRX-CNJBRALLSA-N				1.27718	2.65283e-05	0.000111357	1.49236	0.577594
D1H4	Hydroxy-alpha-sanshool	263.189	83883-10-7		C16H25NO2	LHFKHAVGGJJQFF-UEOYEZOQSA-N	Fatty acids	Fatty amides	N-acyl amines	1.23695	0.00028674	0.000840881	1.80593	0.852739
D1J1	Dihydrokavain	232.11	587-63-3		C14H16O3	VOOYTQRREPYRIW-LBPRGKRZSA-N	Shikimates and Phenylpropanoids	Styrylpyrones	Kavalactones and derivatives	1.32546	7.12043e-05	0.000253767	0.671382	-0.574795
D1T0	Ethyl p-methoxycinnamate	206.094	24393-56-4	C10476	C12H14O3	DHNGCHLFKUPGPX-RMKNXTFCSA-N	Shikimates and Phenylpropanoids	Phenylpropanoids	Cinnamic acids and derivatives	1.33334	4.06475e-07	3.53585e-06	1.75096	0.808145
D1U3	Bavachin	324.136	19879-32-4		C20H20O4	OAUREGNZECGNQS-IBGZPJMESA-N	Shikimates and Phenylpropanoids	Flavonoids	Flavanones	1.19003	0.000533169	0.00139981	0.69371	-0.527596
D1X3	Methyl caffeate	194.058	3843-74-1		C10H10O4	OCNYGKNIVPVPPX-HWKANZROSA-N	Shikimates and Phenylpropanoids	Phenylpropanoids	Cinnamic acids and derivatives	1.3722	3.88413e-06	2.1245e-05	0.298806	-1.74272
D2A0	Hispidin	246.053	56070-89-4		C13H10O5	SGJNQVTUYXCBKH-HNQUOIGGSA-N	Shikimates and Phenylpropanoids	Styrylpyrones	Kavalactones and derivatives	1.3492	1.07227e-05	4.99469e-05	1.59222	0.671037
D2B9	Crocetin	342.183	27876-94-4		C21H26O4	DGGQUKOLHQXDLV-QTNXRKSWSA-N	Terpenoids	Apocarotenoids	Miscellaneous apocarotenoids	1.25335	0.00109101	0.00258264	0.713726	-0.486558
D2H7	Methyl 4-hydroxycinnamate	178.063	19367-38-5		C10H10O3	NITWSHWHQAQBAW-QPJJXVBHSA-N	Shikimates and Phenylpropanoids	Phenylpropanoids	Cinnamic acids and derivatives	1.13843	0.00106762	0.00253559	0.696635	-0.521524
D2I3	trans-Trimethoxyresveratrol	270.126	22255-22-7		C17H18O3	GDHNBPHYVRHYCC-SNAWJCMRSA-N	Shikimates and Phenylpropanoids	Stilbenoids	Monomeric stilbenes	1.27619	2.74483e-05	0.000113895	1.34499	0.4276
D2R8	Chiro-Inositol	180.063	643-12-9		C6H12O6	CDAISMWEOUEBRE-LKPKBOIGSA-N	Carbohydrates	Polyols	Cyclitols	1.24958	5.6682e-05	0.000209869	1.23599	0.305669
D2T0	methyl 3-(2,5-dihydroxyphenyl)prop-2-enoate	194.058	63177-57-1		C10H10O4	BQCNSTFWSKOWMA-UHFFFAOYSA-N	Shikimates and Phenylpropanoids	Phenylpropanoids	Cinnamic acids and derivatives	1.37191	5.73119e-06	2.97692e-05	0.299054	-1.74152
D2T5	Durabolin	406.251	62-90-8		C27H34O3	UBWXUGDQUBIEIZ-UHFFFAOYSA-N	Terpenoids	Steroids	Estrane steroids	1.34984	1.57509e-07	1.69734e-06	2.00402	1.0029
D2W3	Gamma-undecalactone	184.146	104-67-6		C11H20O2	PHXATPHONSXBIL-UHFFFAOYSA-N	Fatty acids	Fatty esters	Lactones	1.04835	0.00492755	0.00982787	0.791996	-0.336435
D3B1	2(3H)-Benzothiazolone	151.009	934-34-9		C7H5NOS	YEDUAINPPJYDJZ-UHFFFAOYSA-N	Alkaloids	Anthranilic acid alkaloids	Acridone alkaloids	1.24474	7.34449e-05	0.000257414	0.845202	-0.242633
D3C1	Ethyl coumarin-3-carboxylate	218.058	1846-76-0		C12H10O4	XKHPEMKBJGUYCM-UHFFFAOYSA-N	Shikimates and Phenylpropanoids	Coumarins	Simple coumarins	1.25466	3.19974e-05	0.000128345	1.96608	0.975324
D3K6	Tetrahydroharman-3-carboxylic acid	230.106			C13H14N2O2	ZUPHXNBLQCSEIA-UHFFFAOYSA-N	Alkaloids	Tryptophan alkaloids	Carboline alkaloids	1.2239	0.000144152	0.000462569	0.583977	-0.776017
D3N2	2,3,4,9-tetrahydropyrido[3,4-b]indol-1-one	186.079	17952-82-8		C11H10N2O	FZHZQHNKCPJTNQ-UHFFFAOYSA-N	Alkaloids	Tryptophan alkaloids	Carboline alkaloids	1.1687	0.000389024	0.00108866	1.62289	0.698564
D3N9	Testosterone acetate	330.219	1045-69-8		C21H30O3	DJPZSBANTAQNFN-PXQJOHHUSA-N	Terpenoids	Steroids	Androstane steroids	1.24154	4.81154e-05	0.000180934	1.38441	0.469273
D3P5	4-Hydroxyphenyl acetate	152.047	3233-32-7	C13636	C8H8O3	HBMCQTHGYMTCOF-UHFFFAOYSA-N	Shikimates and Phenylpropanoids	Phenolic acids	Simple phenolic acids	1.35205	3.69506e-09	1.1116e-07	1.77618	0.828778
D3T3	Nandrolone propionate	330.219	7207-92-3		C21H30O3	LGRKCTFWUWAKON-RRFJAZBJSA-N	Terpenoids	Steroids	Androstane steroids	1.29964	3.39569e-06	1.89022e-05	1.46312	0.549049
D3T4	4,7,7-trimethyl-3-oxo-2-oxabicyclo[2.2.1]heptane-1-carboxylic acid	198.089	67111-66-4		C10H14O4	KPWKPGFLZGMMFX-UHFFFAOYSA-N	Terpenoids	Monoterpenoids	Camphane monoterpenoids	1.29624	4.21715e-06	2.28931e-05	1.37194	0.45622
D3U7	Epoxyazadiradione	466.236	18385-59-6		C28H34O6	NEYCGDYQBQONFC-ITZWZEDMSA-N	Terpenoids	Triterpenoids	Limonoids	1.32071	2.01197e-06	1.22071e-05	1.60834	0.685575
D3U9	2-phenylethyl 3-(4-hydroxy-3-methoxy-phenyl)prop-2-enoate	298.121	71835-85-3		C18H18O4	CZQNYPBIOHVQQN-UHFFFAOYSA-N	Shikimates and Phenylpropanoids	Phenylpropanoids	Cinnamic acids and derivatives	1.14452	0.000744595	0.00187316	0.878284	-0.18724
D3V9	Bungeiside C	430.148	149475-53-6		C19H26O11	YQOKGDRMWQLQNR-BMVMOQKNSA-N				1.19787	0.00026086	0.000778269	1.1747	0.23229
D3W8	Benzyl beta-primeveroside	402.153	130622-31-0		C18H26O10	WOGBNISMMIOPAZ-NWQIESHVSA-N				1.30055	5.79545e-06	2.9888e-05	0.62347	-0.681607
D3X0	Yakuchinone-A	312.173	78954-23-1		C20H24O3	TXELARZTKDBEKS-UHFFFAOYSA-N	Shikimates and Phenylpropanoids	Diarylheptanoids	Linear diarylheptanoids	1.31148	2.3737e-06	1.41638e-05	0.711699	-0.490661
D3Y0	1,3-dihydroxy-2-methoxy-anthracene-9,10-dione	270.053			C15H10O5	JHNIAAKMKICMPB-UHFFFAOYSA-N	Polyketides	Polycyclic aromatic polyketides	Anthraquinones and anthrones	1.278	1.6177e-05	7.12183e-05	1.3736	0.457963
D4B3	Butylscopolamine	360.217	149-64-4		C21H30NO4+	YBCNXCRZPWQOBR-MWGADRMYSA-N				1.29568	3.18577e-06	1.8401e-05	1.33842	0.420534
D4B9	Dihydroguaiaretic acid	330.183			C20H26O4	ADFOLUXMYYCTRR-UHFFFAOYSA-N	Shikimates and Phenylpropanoids	Lignans	Dibenzylbutane lignans	1.02183	0.0066858	0.0127818	0.751614	-0.411936
D4P4	Cleomiscosin A	386.1	76948-72-6		C20H18O8	OCBGWPJNUZMLCA-NVXWUHKLSA-N	Shikimates and Phenylpropanoids	Coumarins	Coumarinolignans	1.17783	0.000456923	0.00123558	1.28952	0.366833
D4S9	4-(2,3-Dihydroxy-3-methylbutoxy)furo(3,2-g)chromen-7-one	304.095			C16H16O6	PEWFWDOPJISUOK-UHFFFAOYSA-N	Shikimates and Phenylpropanoids	Coumarins	Furocoumarins	1.29524	3.52319e-06	1.94179e-05	2.07826	1.05538
D4V3	2-pentyl-1H-quinolin-4-one	215.131	109072-26-6		C14H17NO	IASGNHXZHCRCBY-UHFFFAOYSA-N	Alkaloids	Tryptophan alkaloids	Quinoline alkaloids	1.26891	2.26362e-05	9.68665e-05	1.34881	0.431689
D4W4	p-Hydroxyphenethyl trans-ferulate	314.115	84873-15-4		C18H18O5	JMSFLLZUCIXALN-WEVVVXLNSA-N	Shikimates and Phenylpropanoids	Phenylpropanoids	Cinnamic acids and derivatives	1.35525	3.55511e-08	5.25597e-07	0.755478	-0.404539
D4Z6	Colladin	424.225	28691-96-5		C26H32O5	MNGYOFNIAOWXIT-DNRBGDKYSA-N	Shikimates and Phenylpropanoids	Coumarins	Simple coumarins	1.15687	0.000795546	0.00196707	1.5165	0.600743
D5C3	Gly-pro-glu	301.127			C12H19N3O6	JJGBXTYGTKWGAT-YUMQZZPRSA-N	Amino acids and Peptides	Small peptides	Dipeptides	1.18074	0.000425291	0.00116753	1.4913	0.57657
D5E2	(+/-)-Homoeriodictyol	302.079	446-71-9		C16H14O6	FTODBIPDTXRIGS-UHFFFAOYSA-N	Shikimates and Phenylpropanoids	Flavonoids	Flavanones	1.37022	1.35227e-09	5.13862e-08	0.556736	-0.844934
D5M5	5-[6-(3-hydroxy-4-methoxy-phenyl)-1,3,3a,4,6,6a-hexahydrofuro[3,4-c]furan-3-yl]-2-methoxy-phenol	358.142			C20H22O6	VRHZMFGDDGFRLP-UHFFFAOYSA-N	Shikimates and Phenylpropanoids	Lignans	Furofuranoid lignans	1.27944	1.37959e-05	6.22542e-05	1.35671	0.440108
D5O4	Calycanthoside	384.106	16845-16-2		C17H20O10	IKUQEFGEUOOPGY-QSDFBURQSA-N	Shikimates and Phenylpropanoids	Coumarins	Simple coumarins	1.3756	2.27938e-11	2.05714e-09	3.0883	1.62681
D5Q0	Salipurposid	434.121			C21H22O10	MFQIWHVVFBCURA-LKBAIHPRSA-N	Shikimates and Phenylpropanoids	Flavonoids	Flavanones	1.29257	0.00203085	0.00440323	2.2249	1.15374
D5T3	3,5-dihydroxy-7-methoxy-2-(4-methoxyphenyl)chromen-4-one	314.079	15486-33-6		C17H14O6	KZBAXKKOXPLOBX-UHFFFAOYSA-N	Shikimates and Phenylpropanoids	Flavonoids	Flavonols	1.35425	4.29321e-05	0.000165759	2.1114	1.0782
D5T5	3,4-Dimethoxycinnamyl alcohol	194.094	40918-90-9		C11H14O3	OYICGYUCCHVYRR-ONEGZZNKSA-N	Shikimates and Phenylpropanoids	Phenylpropanoids	Cinnamic acids and derivatives	1.19292	0.000383713	0.00108219	1.36509	0.448992
D5Y7	Ferulamide	193.074			C10H11NO3	YYAJJKZSQWOLIP-HWKANZROSA-N	Shikimates and Phenylpropanoids	Phenylpropanoids	Cinnamic acids and derivatives	1.27634	3.49124e-05	0.000137892	0.669224	-0.57944
D5Z2	(14Z)-9-(1,1-dimethylallyl)-11-hydroxy-14-(1H-imidazol-5-ylmethylene)-2-methoxy-2,13,16-triazatetracyclo[7.7.0.01,13.03,8]hexadeca-3,5,7,10-tetraene-12,15-dione	433.175			C23H23N5O4	JTJJJLSLKZFEPJ-YVLHZVERSA-N	Alkaloids	Histidine alkaloids	Imidazole alkaloids	1.26544	3.63501e-05	0.000141101	0.528922	-0.918873
D6A2	Clausenacoumarine	366.11	87838-97-9		C21H18O6	XVVBVBKVMMNZHB-LFYBBSHMSA-N	Shikimates and Phenylpropanoids	Coumarins	Simple coumarins	1.2725	2.88759e-05	0.000117788	1.57893	0.658947
D6A9	5-Geranyloxy-7-methoxycoumarin	328.167	7380-39-4		C20H24O4	WXUOSNJWDJOHGW-XNTDXEJSSA-N	Shikimates and Phenylpropanoids	Coumarins	Simple coumarins	1.23542	8.97638e-05	0.000307154	0.781799	-0.355131
D6E6	Luteolin-5-O-beta-rutinoside	594.158			C27H30O15	VMSNOYODYWRTOP-FOBVWLSUSA-N	Shikimates and Phenylpropanoids	Flavonoids	Flavones	1.03151	0.00562873	0.0109836	0.829443	-0.269784
D6E9	Colladonin	382.214	100785-98-6		C24H30O4	FCWYNTDTQPCVPG-XLRKYUMYSA-N	Shikimates and Phenylpropanoids	Coumarins	Simple coumarins	1.32815	8.54714e-07	6.42816e-06	1.49604	0.581153
D6H7	2-nonyl-1H-quinolin-4-one	271.194	55396-45-7		C18H25NO	KKRXDNYRUZGPFM-UHFFFAOYSA-N	Alkaloids	Tryptophan alkaloids	Quinoline alkaloids	1.36512	3.11716e-10	1.60756e-08	1.65058	0.722973
D6H8	Pinellic acid	330.241			C18H34O5	MDIUMSLCYIJBQC-MVFSOIOZSA-N	Fatty acids	Octadecanoids	Other Octadecanoids	1.3791	1.83736e-08	3.23555e-07	0.36967	-1.43569
D6K6	3-p-Coumaroylquinic acid	338.1			C16H18O8	BMRSEYFENKXDIS-QHAYPTCMSA-N	Shikimates and Phenylpropanoids	Phenylpropanoids	Cinnamic acids and derivatives	1.22025	0.000127853	0.00041959	1.3137	0.393635
D6N4	Cnidicin	354.147	14348-21-1		C21H22O5	HJMDOAWWVCOEDW-UHFFFAOYSA-N	Shikimates and Phenylpropanoids	Coumarins	Simple coumarins	1.35388	7.59586e-08	9.97129e-07	0.33432	-1.5807
D6O7	kaempferol 7-O-glucoside	448.101	16290-07-6		C21H20O11	YPWHZCPMOQGCDQ-HMGRVEAOSA-N	Shikimates and Phenylpropanoids	Flavonoids	Flavonols	1.26115	5.11196e-05	0.000191235	1.52632	0.610061
D6P9	Quinolactacin A	270.137			C16H18N2O2	FLHQAMWKNPOTDV-UHFFFAOYSA-N	Alkaloids	Anthranilic acid alkaloids	Acridone alkaloids	1.20764	0.002869	0.00600412	1.52131	0.605314
D6Q2	(3R,4R)-4-[(4-hydroxy-3,5-dimethoxy-phenyl)methyl]-3-[(4-hydroxy-3-methoxy-phenyl)methyl]tetrahydrofuran-2-one	388.152	362662-48-4		C21H24O7	QQJNIQAYUUHBGC-LSDHHAIUSA-N	Shikimates and Phenylpropanoids	Lignans	Dibenzylbutyrolactone lignans	1.03357	0.00560066	0.0109836	1.38643	0.471376
D6S8	Betulalbuside A	332.184			C16H28O7	WEHZDNHJZBEGME-PAHMEIBGSA-N	Terpenoids	Monoterpenoids	Acyclic monoterpenoids	1.32464	1.54773e-06	1.00342e-05	1.75	0.807356
D6V5	Luteolin 7-rutinoside	594.158	20633-84-5		C27H30O15	MGYBYJXAXUBTQF-FOBVWLSUSA-N	Shikimates and Phenylpropanoids	Flavonoids	Flavones	1.03151	0.00562873	0.0109836	0.829443	-0.269784
D6Y0	Micromarin F	260.105	73292-93-0		C15H16O4	NYBDJZVNEBTWCZ-XCVCLJGOSA-N	Shikimates and Phenylpropanoids	Coumarins	Simple coumarins	1.28413	7.0137e-06	3.51659e-05	1.7286	0.789601
D6Y3	Sibiricose A3	462.137	139726-39-9		C19H26O13	CDTIMEVVBBGLIF-OVUASUNJSA-N	Shikimates and Phenylpropanoids	Phenolic acids	Simple phenolic acids	1.35546	2.39405e-05	0.000101082	0.342432	-1.54611
D6Y9	D-arabinofuranose	150.053	147-81-9		C5H10O5	HMFHBZSHGGEWLO-ZRMNMSDTSA-N	Carbohydrates	Saccharides	Monosaccharides	1.04511	0.00517358	0.0102619	0.876411	-0.190321
D7B2	methyl 8-[(1S,5R)-4-oxo-5-[(Z)-pent-2-enyl]cyclopent-2-en-1-yl]octanoate	306.219			C19H30O3	AXDNONFPXLVMOY-HBKWROQRSA-N	Fatty acids	Octadecanoids	12-oxophytodienoic acid metabolites	1.17625	0.000322714	0.000931997	1.70516	0.769911
D7C1	3-(2-Glucosyloxy-4-methoxyphenyl)propanoic acid	358.126	477873-63-5		C16H22O9	LIVNOUBJFOXZOR-YMILTQATSA-N				1.3734	9.77764e-07	7.20352e-06	0.326502	-1.61483
D7H0	Kankanoside E	348.178	906080-70-4		C16H28O8	FOXBWGQSBSJEOT-FHMJDAQXSA-N				1.37021	1.35538e-06	9.14564e-06	0.206633	-2.27486
D7J3	Pyripyropene A	583.242	147444-03-9		C31H37NO10	PMMQOFWSZRQWEV-RVTXXDJVSA-N	Terpenoids	Meroterpenoids	Triketide meroterpenoids	1.3386	2.31325e-07	2.19759e-06	0.387413	-1.36806
D7L4	Erysubin F	390.183			C25H26O4	YBJJPNXZVZRDIU-UHFFFAOYSA-N	Shikimates and Phenylpropanoids	Isoflavonoids	Isoflavones	1.34837	3.56707e-08	5.25597e-07	1.66015	0.731314
D7R3	Anwulignan	328.167			C20H24O4	QDDILOVMGWUNGD-UHFFFAOYSA-N	Shikimates and Phenylpropanoids	Lignans	Dibenzylbutane lignans	1.37574	1.35384e-11	2.05714e-09	2.28162	1.19006
D7T1	(E)-3-(4-methoxyphenyl)-1-[2,4,6-trimethoxy-3-(3-methylbut-2-enyl)phenyl]prop-2-en-1-one	396.194			C24H28O5	GGNVSANPVOEGII-GXDHUFHOSA-N	Shikimates and Phenylpropanoids	Flavonoids	Chalcones	1.13897	0.0015814	0.00352399	1.37661	0.461123
D7V3	Olivil 4'-O-glucoside	538.205	76880-93-8		C26H34O12	SXGSYHDLSPXCMU-CTQTXEDXSA-N	Shikimates and Phenylpropanoids	Lignans	Furanoid lignans	1.31779	1.31077e-06	8.95527e-06	0.597161	-0.743808
D7W7	Icariside F2	402.153	115009-57-9		C18H26O10	NJMQSVWMCODQIP-FQXXIRCGSA-N	Shikimates and Phenylpropanoids			1.37091	8.00102e-10	3.61046e-08	0.596327	-0.745824
D7X0	3-methoxy-4-[3,4,5-trihydroxy-6-(hydroxymethyl)tetrahydropyran-2-yl]oxy-benzoic acid	330.095			C14H18O9	JYFOSWJYZIVJPO-UHFFFAOYSA-N	Shikimates and Phenylpropanoids	Phenolic acids	Simple phenolic acids	1.15131	0.000802406	0.00197053	0.92429	-0.113583
D8B2	2-[4-(beta-d-Glucopyranosyloxy)phenyl]acetic acid	314.1			C14H18O8	YHJWCNZGHBFVTB-RGCYKPLRSA-N	Shikimates and Phenylpropanoids			1.2781	0.000337172	0.000969874	0.845398	-0.242298
D8C0	Dihydroconiferin	344.147	17609-06-2		C16H24O8	QFYFLJZBZITPGX-IBEHDNSVSA-N	Shikimates and Phenylpropanoids			1.26575	6.4354e-05	0.000232318	1.36646	0.450443
D8E6	(3S,4aR,5R,6R)-3,6-dihydroxy-3-isopropenyl-4a,5-dimethyl-5,6,7,8-tetrahydro-4H-naphthalen-2-one	250.157	129602-11-5		C15H22O3	SFNQVDIXXKZSCB-BTQDYEIMSA-N	Terpenoids	Sesquiterpenoids	Eremophilane sesquiterpenoids	1.22068	0.000174066	0.000551208	1.31147	0.391181
D8G3	2-[[3,4-dihydroxy-5-(hydroxymethyl)tetrahydrofuran-2-yl]oxymethyl]-6-[1-methyl-1-(4-methylcyclohex-3-en-1-yl)ethoxy]tetrahydropyran-3,4,5-triol	448.231			C21H36O10	VQNYZNUWUDHTKB-UHFFFAOYSA-N	Terpenoids	Monoterpenoids		1.12359	0.00147509	0.00332818	1.20881	0.273592
D8K8	(2S,3R,4S,5S,6R)-2-(4-allyl-2-methoxy-phenoxy)-6-[[(2R,3R,4R)-3,4-dihydroxy-4-(hydroxymethyl)tetrahydrofuran-2-yl]oxymethyl]tetrahydropyran-3,4,5-triol	458.179	136083-96-0		C21H30O11	PCNDZKRTANOUCK-RHAOSNMYSA-N	Shikimates and Phenylpropanoids	Phenylpropanoids	Cinnamic acids and derivatives	1.05609	0.00295135	0.00615859	1.54161	0.624439
D8S5	Cnidioside A	368.111	141896-53-9		C17H20O9	OHMWGMHIZWOKHV-USACIQFYSA-N	Shikimates and Phenylpropanoids	Coumarins	Simple coumarins	1.36748	1.51055e-10	9.08846e-09	2.43297	1.28272
D8U9	6,7-dimethoxy-8-[(2S,3R,4S,5S,6R)-3,4,5-trihydroxy-6-(hydroxymethyl)tetrahydropyran-2-yl]oxy-chromen-2-one	384.106	58970-71-1		C17H20O10	MLOMRDQPPYHSAX-QSDFBURQSA-N	Shikimates and Phenylpropanoids	Coumarins	Simple coumarins	1.3756	2.27938e-11	2.05714e-09	3.0883	1.62681
D8V3	[(2R,3S,4Z)-2-(4-hydroxy-3-methoxy-phenyl)-4-[(4-hydroxy-3-methoxy-phenyl)methylene]tetrahydrofuran-3-yl]methyl 4-hydroxybenzoate	478.163			C27H26O8	NYOJCGUMMQIVQV-IKZXVXKRSA-N	Shikimates and Phenylpropanoids	Lignans	Neolignans	1.36729	4.66717e-10	2.24646e-08	2.77134	1.47058
D8X8	8-[1-methyl-1-[(2S,3R,4S,5S,6R)-3,4,5-trihydroxy-6-(hydroxymethyl)tetrahydropyran-2-yl]oxy-ethyl]-8,9-dihydrofuro[2,3-h]chromen-2-one	408.142			C20H24O9	UCJHITBUIWHISE-GMMZNBDUSA-N	Shikimates and Phenylpropanoids	Coumarins	Furocoumarins	1.34645	1.42348e-08	2.79881e-07	1.70635	0.770917
D9F1	Praeroside III	424.137			C20H24O10	QAUDHOGPLBDVAX-KTZZUYPUSA-N	Shikimates and Phenylpropanoids	Coumarins	Pyranocoumarins	1.11239	0.000932524	0.00224428	1.34811	0.430943
D9F6	[(1S,3R,3aS,4S,8aR)-1,3-dihydroxy-3-isopropyl-6,8a-dimethyl-1,2,3a,4,5,8-hexahydroazulen-4-yl] 4-methoxybenzoate	388.225			C23H32O5	RXDHJTUMDKQLEV-PTLNGURQSA-N	Terpenoids	Sesquiterpenoids	Daucane sesquiterpenoids	1.25679	8.88056e-05	0.000305322	1.85785	0.893638
D9N3	(11E,15Z)-9,10,13-Trihydroxy-11,15-octadecadienoic acid	328.225			C18H32O5	ADHVWICOFLYDST-MKZMYESJSA-N	Fatty acids	Octadecanoids	Other Octadecanoids	1.37227	9.1235e-07	6.79089e-06	0.506363	-0.981755
D9S6	4-(2,7-Dihydroxy-6-methylheptan-2-yl)-3-hydroxybenzoic acid	282.147			C15H22O5	ISHXRANDGDVGJS-UHFFFAOYSA-N	Terpenoids	Sesquiterpenoids	Bisabolane sesquiterpenoids	1.37377	4.07712e-11	3.27076e-09	2.00304	1.00219
D9T8	[(2R,3S,4S,5R,6R)-3,4,5-trihydroxy-6-[2-(3-hydroxy-5-oxo-tetrahydrofuran-3-yl)propoxy]tetrahydropyran-2-yl]methyl (E)-3-(3,4-dihydroxyphenyl)prop-2-enoate	484.158			C22H28O12	YNPOIPFNQJKGQJ-SALKWGHLSA-N	Shikimates and Phenylpropanoids	Phenylpropanoids	Cinnamic acids and derivatives	1.28435	1.04847e-05	4.91555e-05	1.63553	0.709759
D9X5	methyl (2R)-2-[(1S,3S,7R,8R,9R,12S,13S)-13-(3-furyl)-6,6,8,12-tetramethyl-17-methylene-5,15-dioxo-2,14-dioxatetracyclo[7.7.1.01,12.03,8]heptadecan-7-yl]-2-hydroxy-acetate	486.225			C27H34O8	GOYZKWCPWBKPIG-JRMYCMGUSA-N	Terpenoids	Triterpenoids	Limonoids	1.01695	0.014208	0.0247782	1.47624	0.561927
D9X6	2-[6-acetyl-3-(2-methylpropanoyloxy)-2,3-dihydrobenzofuran-2-yl]allyl 2-methylpropanoate	374.173			C21H26O6	CPDCJXCECPCPNL-UHFFFAOYSA-N	Polyketides	Linear polyketides		1.34496	7.55386e-09	1.75932e-07	2.1431	1.0997
D9Y8	(2R,3S,4S,5R,6R)-2-[[(2S,3R,4R)-3,4-dihydroxy-4-(hydroxymethyl)tetrahydrofuran-2-yl]oxymethyl]-6-[3-(4-hydroxyphenyl)-1-methyl-propoxy]tetrahydropyran-3,4,5-triol	460.194	146609-83-8		C21H32O11	QJVVGCSWIOLQDG-PROUKMOUSA-N	Shikimates and Phenylpropanoids	Phenylethanoids	Phenylethanoids	1.31533	3.33652e-06	1.89022e-05	0.673526	-0.570194
E0C1	(5Z)-4-[2-[2-(3,4-dihydroxyphenyl)ethoxy]-2-oxo-ethyl]-5-ethylidene-6-[(2S,3R,4S,5S,6R)-3,4,5-trihydroxy-6-(hydroxymethyl)tetrahydropyran-2-yl]oxy-4H-pyran-3-carboxylic acid	526.169	52077-55-1		C24H30O13	HKVGJQVJNQRJPO-GSDSTAPDSA-N	Terpenoids	Monoterpenoids	Secoiridoid monoterpenoids	1.31687	1.67564e-06	1.07063e-05	0.405672	-1.30161
E0D2	(2S,9R,13R,14S,16R)-16-hydroxy-17-[5-(1-hydroxy-1-methyl-ethyl)-2-methyl-tetrahydrofuran-2-yl]-4,4,9,13,14-pentamethyl-2-[(2S,3R,4S,5S,6R)-3,4,5-trihydroxy-6-(hydroxymethyl)tetrahydropyran-2-yl]oxy-2,7,8,10,12,15,16,17-octahydro-1H-cyclopenta[a]phenanthrene-3,11-dione	664.382			C36H56O11	BWLJNNFSQWDPOQ-KPYSTMOOSA-N	Terpenoids	Triterpenoids	Cucurbitane triterpenoids	1.15712	0.00470051	0.00940102	37.7131	5.23699
E0D9	Tomazin	386.137			C21H22O7	VJVXQSFKTVUEFY-XGICHPGQSA-N	Shikimates and Phenylpropanoids	Coumarins	Simple coumarins	1.3493	1.83675e-07	1.89447e-06	1.63017	0.705023
E0E1	5-O-Cinnamoylquinic acid	322.105	6470-68-4		C16H18O7	WTMHIVNZOSRKJU-MUMPLMHTSA-N	Shikimates and Phenylpropanoids	Phenylpropanoids	Cinnamic acids and derivatives	1.06505	3.54158e-05	0.000138217	3.85935	1.94836
E0E3	Tuberoside A	956.498	107241-05-4		C48H76O19	VQIUANBMNYRFDG-KKWQFPQQSA-N	Terpenoids	Triterpenoids	Oleanane triterpenoids	1.08763	0.00325673	0.00671817	0.640584	-0.64254
E0E8	(Z)-5,8,11-trihydroxyoctadec-9-enoic acid	330.241			C18H34O5	FITAKYVPWCVTII-QBFSEMIESA-N	Fatty acids	Octadecanoids	Other Octadecanoids	1.37922	7.96988e-08	1.00952e-06	0.41062	-1.28413
E0F4	(2R,3R,4S,5S,6R)-2-[[6-hydroxy-4-(4-hydroxy-3,5-dimethoxy-phenyl)-3-(hydroxymethyl)-5,7-dimethoxy-tetralin-2-yl]methoxy]-6-(hydroxymethyl)tetrahydropyran-3,4,5-triol	582.231			C28H38O13	PACBNJFGEWTGCE-OVYNBQGTSA-N	Shikimates and Phenylpropanoids	Lignans	Arylnaphthalene and aryltetralin lignans	1.36917	2.23239e-07	2.14905e-06	0.109199	-3.19497
E0G3	Cnidioside B	398.121	141896-54-0		C18H22O10	YVYNMIFMUKDFEC-AXOAAPQKSA-N	Shikimates and Phenylpropanoids			1.37329	1.96443e-11	2.05714e-09	3.07254	1.61943
E0I8	N-Trans-Sinapoyltyramine	343.142	200125-11-7		C19H21NO5	IEDBNTAKVGBZEP-VMPITWQZSA-N	Shikimates and Phenylpropanoids	Phenylpropanoids	Cinnamic acid amides	1.00584	2.83412e-06	1.65129e-05	3.13934	1.65046
E0J0	Swietenocoumarin B	284.105	64652-23-9		C17H16O4	UZXMLGUMBQQVME-UHFFFAOYSA-N	Shikimates and Phenylpropanoids	Coumarins	Simple coumarins	1.2578	1.44375e-05	6.47447e-05	1.40519	0.490763
E0J1	7-[(2E,5E)-7-hydroxy-3,7-dimethyl-octa-2,5-dienoxy]chromen-2-one	314.152			C19H22O4	ZHQPRJMIAALFHX-ATTWWORZSA-N	Shikimates and Phenylpropanoids	Coumarins	Simple coumarins	1.15407	0.000882704	0.00213148	1.16482	0.220103
E0K1	N-Methylhernagine	341.163	4668-25-1		C20H23NO4	KJAVJETZYFENNG-ZDUSSCGKSA-N	Alkaloids	Tyrosine alkaloids	Aporphine alkaloids	1.19911	0.000179216	0.000559372	0.668086	-0.581894
E0N4	(E)-5-[(1S,4aR,8aR)-2-(hydroxymethyl)-5,5,8a-trimethyl-1,4,4a,6,7,8-hexahydronaphthalen-1-yl]-3-(acetoxymethyl)pent-2-enoic acid	378.241			C22H34O5	OEWYXUOBTOXNMX-VBIQWIQDSA-N	Terpenoids	Diterpenoids	Labdane diterpenoids	1.31925	1.86977e-06	1.17389e-05	1.72545	0.786974
E0P8	Bis-coumaramidobutane	380.174			C22H24N2O4	PYVBFDCHJDMSMM-FNCQTZNRSA-N	Alkaloids	Ornithine alkaloids	Polyamines	1.31586	8.22021e-06	3.98322e-05	0.503222	-0.990732
E0Q8	(8E,12E)-3-benzyl-11-hydroxy-6,8,10,12,14-pentamethyl-15-sec-butyl-1-oxa-4-azacyclopentadeca-8,12-diene-2,5-dione	469.319			C29H43NO4	VFPHWJWFSBZGGT-YNPGSSNYSA-N	Amino acids and Peptides	Oligopeptides	Depsipeptides	1.05596	0.00431769	0.00875667	1.34106	0.423375
E0R9	Chrysoeriol 7-neohesperidoside	608.174	111133-90-5		C28H32O15	LGOQXEQWOCSLEC-CYZBKYQRSA-N	Shikimates and Phenylpropanoids	Flavonoids	Flavones	1.33608	3.03567e-07	2.80994e-06	0.765179	-0.386131
E0T8	6-hydroxy-3,8a-dimethyl-5-methylene-4a,6,7,8,9,9a-hexahydro-4H-benzo[f]benzofuran-2-one	248.141			C15H20O3	ZZOXVUOWFGRQLK-UHFFFAOYSA-N	Terpenoids	Sesquiterpenoids	Eudesmane sesquiterpenoids	1.27605	9.94389e-06	4.69248e-05	1.649	0.72159
E0X3	7-[4,5-dihydroxy-6-(hydroxymethyl)-3-[(2S,3R,4R,5R,6S)-3,4,5-trihydroxy-6-methyl-tetrahydropyran-2-yl]oxy-tetrahydropyran-2-yl]oxy-5-hydroxy-2-(4-hydroxyphenyl)chroman-4-one	580.179			C27H32O14	DFPMSGMNTNDNHN-GORRZPGTSA-N	Shikimates and Phenylpropanoids	Flavonoids	Flavanones	1.36391	4.69888e-06	2.49455e-05	3.47197	1.79575
E0X6	(2S,3R,4S,5S,6R)-2-[4-[(3R,4S)-4-hydroxy-4-[(4-hydroxy-3-methoxy-phenyl)methyl]-3-(hydroxymethyl)tetrahydrofuran-2-yl]-2-methoxy-phenoxy]-6-(hydroxymethyl)tetrahydropyran-3,4,5-triol	538.205	56440-73-4		C26H34O12	OXHVZEZYYQQCRJ-ZLNFVOGTSA-N	Shikimates and Phenylpropanoids	Lignans	Furanoid lignans	1.31779	1.31077e-06	8.95527e-06	0.597161	-0.743808
E0Z6	2-[4-[4-[(4-hydroxy-3-methoxy-phenyl)methyl]-3-(hydroxymethyl)tetrahydrofuran-2-yl]-2-methoxy-phenoxy]-6-(hydroxymethyl)tetrahydropyran-3,4,5-triol	522.21			C26H34O11	KNFOHFRALRKTOJ-UHFFFAOYSA-N	Shikimates and Phenylpropanoids	Lignans	Furanoid lignans	1.32062	1.09317e-06	7.89267e-06	0.559569	-0.837612
E1A0	3,5-dimethoxy-9,10-dihydrophenanthrene-2,7-diol	272.105			C16H16O4	BHEGXSNCDUBUFA-UHFFFAOYSA-N	Shikimates and Phenylpropanoids	Phenanthrenoids	Phenanthrenes	1.29921	0.000750663	0.00188187	0.576191	-0.79538
E1C8	[(2R,3S,4S,5R,6R)-3,4,5-trihydroxy-6-[(2R,3R,4S,5S,6R)-3,4,5-trihydroxy-6-[[(E)-2-methylbut-2-enoyl]oxymethyl]tetrahydropyran-2-yl]oxy-tetrahydropyran-2-yl]methyl (E)-2-methylbut-2-enoate	506.2			C22H34O13	HMKCLGLWHYOKSS-NRTMIMPFSA-N	Terpenoids	Monoterpenoids	Iridoids monoterpenoids	1.37293	2.26344e-11	2.05714e-09	2.27817	1.18787
E1K3	[(2R,3R,4R,5R,6S)-6-[(E)-1,5-dimethyl-6-oxo-6-[(2S,3R,4S,5S,6R)-3,4,5-trihydroxy-6-(hydroxymethyl)tetrahydropyran-2-yl]oxy-1-vinyl-hex-4-enoxy]-5-hydroxy-4-[(2E)-6-hydroxy-2,6-dimethyl-octa-2,7-dienoyl]oxy-2-(hydroxymethyl)tetrahydropyran-3-yl] (2E)-6-hydroxy-2,6-dimethyl-octa-2,7-dienoate	840.414			C42H64O17	OIMUSOLEDHKDCV-WJHJMGTLSA-N	Terpenoids	Sesquiterpenoids		1.31027	0.000428079	0.00117073	2.4152	1.27214
E1O7	(E)-5-[(1S,4aR,8aR)-2-formyl-5,5,8a-trimethyl-1,4,4a,6,7,8-hexahydronaphthalen-1-yl]-3-(acetoxymethyl)pent-2-enoic acid	376.225			C22H32O5	KLGPVOFVVYHEGO-VBIQWIQDSA-N	Terpenoids	Diterpenoids	Labdane diterpenoids	1.21155	0.00201016	0.00437149	1.60832	0.68555
E1V7	(-)-erythro-Anethole glycol 2-glucoside	344.147			C16H24O8	JYWSARFDLXXOHT-UHFFFAOYSA-N	Alkaloids			1.08748	0.00967206	0.0178144	0.788524	-0.342774
E1W7	2-[2-[(Z)-pent-2-enyl]-3-[3,4,5-trihydroxy-6-(hydroxymethyl)tetrahydropyran-2-yl]oxy-cyclopentyl]acetic acid	374.194			C18H30O8	GJZJZRWFRZFTEE-ARJAWSKDSA-N	Fatty acids	Octadecanoids	Jasmonic acids	1.03832	0.0053499	0.0105536	0.851422	-0.232054
E1Z8	(6-hydroxy-7-methyl-8-oxo-3-propyl-5,6-dihydro-1H-isochromen-7-yl) 2-hydroxy-4-methoxy-6-methyl-benzoate	402.168			C22H26O7	MXJRGHQPKCPBAN-UHFFFAOYSA-N	Polyketides	Chromanes	Azaphilones	1.31779	1.38959e-07	1.54352e-06	1.73443	0.794463
E2D6	Calenduloside H	956.498	26020-29-1		C48H76O19	QZMAEZWZCGBZFK-VPQYALDZSA-N	Terpenoids	Triterpenoids	Oleanane triterpenoids	1.00495	0.00713589	0.013452	0.819319	-0.287503
E2G8	(Z)-3-(4-hydroxyphenyl)-N-[4-[[(Z)-3-(4-hydroxyphenyl)prop-2-enoyl]amino]butyl]prop-2-enamide	380.174			C22H24N2O4	PYVBFDCHJDMSMM-PVRNWPCDSA-N	Alkaloids	Ornithine alkaloids	Polyamines	1.31586	8.22021e-06	3.98322e-05	0.503222	-0.990732
E2J3	15-Deoxyoxalicine B	503.231			C30H33NO6	FIWRZQROYVDBSG-LXJMSAHPSA-N	Terpenoids	Meroterpenoids	Triketide meroterpenoids	1.08799	0.000792743	0.00196687	0.651194	-0.618841
E2L4	5-[2-(4-allyl-2-methoxy-phenoxy)propyl]-1,2,3-trimethoxy-benzene	372.194			C22H28O5	KKYNVNUZEODDKF-UHFFFAOYSA-N	Shikimates and Phenylpropanoids	Lignans	Neolignans	1.16047	0.0010449	0.00248984	1.50279	0.587647
E2M3	4-[4-hydroxy-2,6,6-trimethyl-3-[(2R,3R,4S,5S,6R)-3,4,5-trihydroxy-6-(hydroxymethyl)tetrahydropyran-2-yl]oxy-cyclohexen-1-yl]butan-2-one	388.21			C19H32O8	JVIDANAJZDBKRL-FJUMDGKUSA-N	Terpenoids	Apocarotenoids	Megastigmanes	1.15365	0.000781627	0.00194598	0.81713	-0.291362
E2M5	(2S,3S)-3,5,7-trihydroxy-2-(4-hydroxyphenyl)-8-(3-methylbut-2-enyl)chroman-4-one	356.126	52589-20-5		C20H20O6	IPWPEUJWMOPJDG-MOPGFXCFSA-N	Shikimates and Phenylpropanoids	Flavonoids	Dihydroflavonols	1.16082	4.62139e-05	0.000175613	0.465674	-1.10261
E2N1	5-Hydroxyisofraxidin 7-beta-D-Glucoside	400.101			C17H20O11	KDWWYRPEBULRGU-KIZWGXMFSA-N	Shikimates and Phenylpropanoids	Coumarins	Simple coumarins	1.35213	3.21901e-08	4.94495e-07	1.58742	0.666686
E2N9	Erionic acid E	374.209			C22H30O5	LQMRAHHWCLZHQD-ZHACJKMWSA-N	Terpenoids			1.30874	4.3377e-06	2.33718e-05	0.782865	-0.353165
E2O1	Channaine	546.273	1355-47-1		C32H38N2O6	FOAPBJMMOXYHAN-UHFFFAOYSA-N	Alkaloids	Tyrosine alkaloids	Isoquinoline alkaloids	1.30236	1.31476e-06	8.95527e-06	0.467736	-1.09623
E2Q0	(2S)-7-hydroxy-2-[(2S,3R,4S,5S,6R)-3,4,5-trihydroxy-6-(hydroxymethyl)tetrahydropyran-2-yl]oxy-4H-1,4-benzoxazin-3-one	343.09	28512-70-1		C14H17NO9	VUFDXOACUHDTLI-PUOUXSMHSA-N	Alkaloids			1.34689	1.70106e-07	1.80612e-06	0.48399	-1.04695
E2S5	methacycline	442.138	3963-95-9	C07654	C22H22N2O8	XIYOPDCBBDCGOE-IWVLMIASSA-N	Polyketides	Polycyclic aromatic polyketides	Tetracyclines	1.15766	0.00539575	0.0106151	79.9381	6.32081
E2T3	3,4,8-trihydroxychromen-2-one	194.022			C9H6O5	OJIYXYUCRVFSRV-UHFFFAOYSA-N	Shikimates and Phenylpropanoids	Coumarins	Simple coumarins	1.11525	0.00189391	0.00414365	0.875805	-0.191318
E2T7	N-demethylsambutoxin	439.272			C27H37NO4	YDGOHTBOOYAVOP-XMHGGMMESA-N	Alkaloids	Nicotinic acid alkaloids	Pyridine alkaloids	1.36901	1.53538e-09	5.54273e-08	1.95396	0.9664
E2U7	Methylharmine	226.111			C14H14N2O	QQQXZACTFUGYLB-UHFFFAOYSA-N	Alkaloids	Tryptophan alkaloids	Carboline alkaloids	1.01576	0.00588207	0.0114163	1.31367	0.393598
E2W4	6-[(2S,3R,4R,5S)-3,4-dimethyl-5-(3,4,5-trimethoxyphenyl)tetrahydrofuran-2-yl]-4-methoxy-1,3-benzodioxole	416.184			C23H28O7	RKSBJQZDPAGEQW-NDTBOIMWSA-N	Shikimates and Phenylpropanoids	Lignans	Furanoid lignans	1.08659	0.0044488	0.00897217	1.66438	0.734988
E2Z5	(2E,4Z)-9-oxooctadeca-2,4-dienoic acid	294.219			C18H30O3	MECYDNMVWUSMSU-YTLDOUCOSA-N	Fatty acids	Fatty Acids and Conjugates	Oxo fatty acids	1.28302	5.65566e-06	2.95898e-05	1.97992	0.985442
E3B8	Naringenin trimethyl ether	314.115	38302-15-7		C18H18O5	MQFSCAHSIUPLSB-HNNXBMFYSA-N	Shikimates and Phenylpropanoids	Flavonoids	Flavanones	1.00498	0.0068413	0.0129643	3.3909	1.76167
E3C1	Ncgc00384818-01_C27H30O11_	530.179			C27H30O11	NNCVVPLZMBGDIK-FQABINTDSA-N	Shikimates and Phenylpropanoids	Phenolic acids	Simple phenolic acids	1.212	2.26737e-05	9.68665e-05	2.20584	1.14133
E3E0	5-[(2R,3R,4S,5R,6R)-3,5-dihydroxy-2-(hydroxymethyl)-6-(2-phenylethoxy)tetrahydropyran-4-yl]oxy-3-hydroxy-3-methyl-5-oxo-pentanoic acid	428.168			C20H28O10	WGMNBGJQXOIVGA-HJVQXQJGSA-N				1.06841	0.00307697	0.00638382	0.817254	-0.291144
E3H0	(2R,3S,4S,5R,6R)-2-[[(2R,3R,4R)-3,4-dihydroxy-4-(hydroxymethyl)tetrahydrofuran-2-yl]oxymethyl]-6-[(6,6-dimethylnorpinan-2-yl)methoxy]tetrahydropyran-3,4,5-triol	448.231			C21H36O10	RSKTWDAINBIMPD-MCVCZSGFSA-N	Terpenoids	Monoterpenoids	Pinane monoterpenoids	1.2948	1.37615e-05	6.22542e-05	1.29156	0.369115
E3L4	10-[(2R,3R,4S,5S,6R)-3,4,5-trihydroxy-6-(hydroxymethyl)tetrahydropyran-2-yl]oxydeca-4,6-diynoic acid	342.131			C16H22O8	BAGGOTACEXSWCA-YMILTQATSA-N				1.21102	0.00012976	0.000423923	1.14076	0.189992
E3R8	[5-(5,5,8a-trimethyl-2-methylene-7-oxo-decalin-1-yl)-3-methyl-pentyl] acetate	348.266			C22H36O3	LZGVQJDYLAUCGI-UHFFFAOYSA-N	Terpenoids	Diterpenoids	Labdane diterpenoids	1.32872	1.28953e-07	1.50168e-06	1.70089	0.76629
E3S3	Decuroside IV	540.184			C25H32O13	WUXQDGGGYDCEJK-PVXHOAACSA-N	Shikimates and Phenylpropanoids	Coumarins	Furocoumarins	1.20538	0.00028767	0.000840881	1.21528	0.281285
E3S7	(2beta,3beta,9epsilon,17epsilon,22R)-2,3,14,20,22-Pentahydroxyergost-7-en-6-one	478.329			C28H46O6	KQBCIGPPRFLKLS-VVHPDZBTSA-N	Terpenoids	Steroids	Ecdysteroids	1.15501	0.000438745	0.00119088	1.82512	0.867993
E3U0	(4R,4aS,8aS)-1-hydroxy-2-(hydroxymethyl)-5,5,8a-trimethyl-4-[(2E,4E,6E)-octa-2,4,6-trienoyl]oxy-4a,6,7,8-tetrahydro-4H-naphthalene-1-carboxylic acid	404.22			C23H32O6	WQJXWXRSOBXAGZ-ZGUWDZGWSA-N	Terpenoids	Sesquiterpenoids	Drimane sesquiterpenoids	1.21859	0.000112854	0.000375486	1.62816	0.703244
E3W2	2-[5-[2-[2-(5-acetonyltetrahydrofuran-2-yl)propanoyloxy]butyl]tetrahydrofuran-2-yl]propanoic acid	398.23			C21H34O7	XFNIQDLOQLIJTQ-UHFFFAOYSA-N	Polyketides	Polyethers	Macrotetrolides	1.12176	0.00157405	0.00351846	1.42122	0.507129
E3Z9	2-(Hydroxymethyl)-6-[4-(4-hydroxy-2,6,6-trimethylcyclohexen-1-yl)butan-2-yloxy]oxane-3,4,5-triol	374.23			C19H34O7	QOLJILMTPKQQQA-UHFFFAOYSA-N	Terpenoids	Apocarotenoids	Megastigmanes	1.35953	1.29914e-05	5.9744e-05	0.343232	-1.54274
E4A7	Sphaerobioside	578.164			C27H30O14	XIQCIPHUIZGDLB-SEPMLUPWSA-N	Shikimates and Phenylpropanoids	Isoflavonoids	Isoflavones	1.3253	6.47403e-07	5.13654e-06	1.37344	0.457796
E4B8	Methyl 2-phenyl-2-[3,4,5-trihydroxy-6-[[3,4,5-trihydroxy-6-(hydroxymethyl)oxan-2-yl]oxymethyl]oxan-2-yl]oxyacetate	490.169			C21H30O13	RVTDOHGAKKFMDK-UHFFFAOYSA-N				1.3056	3.69e-07	3.28911e-06	0.342213	-1.54703
E4D5	Coretinphencone	330.095	1631711-77-7		C14H18O9	IYOWHSWFFIPSDK-LNNRFACYSA-N	Polyketides	Phloroglucinols	Acyl phloroglucinols	1.1075	0.00165888	0.00365155	0.942159	-0.0859572
E4E6	(1S,4R,7S,9R)-4-benzyl-9-(1,1-dimethylallyl)-2,5,16-triazatetracyclo[7.7.0.02,7.010,15]hexadeca-10,12,14-triene-3,6-dione	401.21			C25H27N3O2	KAEZOXVVNQPLKP-FKCCAMBISA-N	Alkaloids	Peptide alkaloids	Indole diketopiperazine alkaloids (L-Trp, L-Trp)	1.09205	0.000633908	0.00161725	1.78976	0.839764
E4F2	3-[2-hydroxy-3-[(2S,3R,4S,5S,6R)-3,4,5-trihydroxy-6-(hydroxymethyl)tetrahydropyran-2-yl]oxy-phenyl]propanoic acid	344.111			C15H20O9	JDNUVLAJLPVYNP-SWMGHYKJSA-N	Shikimates and Phenylpropanoids			1.32527	1.5002e-06	9.84675e-06	0.743658	-0.427288
E4J8	3-[4-[(2S,3R,4S,5S,6R)-3,4,5-trihydroxy-6-(hydroxymethyl)tetrahydropyran-2-yl]oxyphenyl]propanoic acid	328.116			C15H20O8	CTBTYMWZDWFXTH-TVKJYDDYSA-N	Shikimates and Phenylpropanoids			1.3541	7.3602e-09	1.75932e-07	0.444991	-1.16815
E4L4	(2R,3S,4S,5R,6S)-2-(hydroxymethyl)-6-[4-[[(3S,4S,5R)-4-(hydroxymethyl)-5-[3-methoxy-4-[(2S,3R,4S,5S,6R)-3,4,5-trihydroxy-6-(hydroxymethyl)tetrahydropyran-2-yl]oxy-phenyl]tetrahydrofuran-3-yl]methyl]-2-methoxy-phenoxy]tetrahydropyran-3,4,5-triol	684.263			C32H44O16	PBLWZMSRSJTRHJ-CTZSIISJSA-N	Shikimates and Phenylpropanoids	Lignans	Furanoid lignans	1.35311	2.71212e-05	0.000113188	0.464394	-1.10658
E4T2	Apigenin 5-O-neohesperidoside	578.164			C27H30O14	LYKXPTCUGPKDQL-PYXJVEIZSA-N	Shikimates and Phenylpropanoids	Flavonoids	Flavones	1.32547	4.98847e-07	4.09281e-06	1.44996	0.536017
E4T3	(2Z,4E)-5-[(1R,3R,5S,8S)-3,8-dihydroxy-1,5-dimethyl-6-oxabicyclo[3.2.1]octan-8-yl]-3-methyl-penta-2,4-dienoic acid	282.147			C15H22O5	XIVFQYWMMJWUCD-QRFHCBFLSA-N	Terpenoids	Apocarotenoids	Apocarotenoids(ε-)	1.35817	6.73779e-06	3.40188e-05	0.459532	-1.12176
E4T4	(4S)-4-hydroxy-3,5,5-trimethyl-4-[(1E,3E)-3-methyl-5-[(2R,3R,4S,5S,6R)-3,4,5-trihydroxy-6-(hydroxymethyl)tetrahydropyran-2-yl]oxy-penta-1,3-dienyl]cyclohex-2-en-1-one	412.21			C21H32O8	PMGQCIZHFNQTAO-LWJKYDNQSA-N	Terpenoids	Apocarotenoids	Apocarotenoids(ε-)	1.07368	0.0026694	0.00566855	1.28466	0.361382
E4W8	3-hydroxy-3-methyl-5-oxo-5-[[(2R,3S,4S,5R,6R)-3,4,5-trihydroxy-6-propan-2-yloxyoxan-2-yl]methoxy]pentanoic acid	366.153			C15H26O10	WAZVVEWWTPKVME-HOVKHMQVSA-N	Fatty acids	Fatty acyl glycosides	Fatty acyl glycosides of mono- and disaccharides	1.30412	9.47972e-06	4.50287e-05	0.655075	-0.610267
E4Y1	[(2E,6E)-8-(2,6-dihydroxy-4-methyl-phenyl)-2,6-dimethyl-1-(3-methylbut-2-enyl)octa-2,6-dienyl] acetate	386.246			C24H34O4	IDJQMKUDXNUTCW-LAQUFMTMSA-N	Terpenoids	Meroterpenoids	Tetraketide meroterpenoids	1.10917	0.00272069	0.00576053	1.76448	0.819247
E5B2	(E)-2,7-dimethyl-8-[(2R,3R,4S,5S,6R)-3,4,5-trihydroxy-6-(hydroxymethyl)oxan-2-yl]oxydec-4-enedioic acid	406.184			C18H30O10	QPCDZZMPXNUVCK-CJXBJLFHSA-N	Fatty acids	Fatty acyl glycosides		1.37763	1.78536e-07	1.86816e-06	0.225431	-2.14924
E5C9	4-hydroxy-6-[1-[1-(2-hydroxyethyl)-4,7-dimethyl-isochroman-3-yl]ethyl]-3-methyl-pyran-2-one	358.178			C21H26O5	KYRDITCXPNFIBT-UHFFFAOYSA-N	Polyketides	Cyclic polyketides		1.14238	0.00628482	0.0121327	0.70846	-0.497242
E5D4	(4E,6E)-2,7-dimethyl-8-[(2R,3R,4S,5S,6R)-3,4,5-trihydroxy-6-(hydroxymethyl)tetrahydropyran-2-yl]oxy-octa-4,6-dienoic acid	346.163			C16H26O8	AEXJDSDOWQJVOT-HHAXVGFASA-N				1.37985	4.39732e-08	6.10551e-07	0.0688835	-3.8597
E5D5	(2S,3R,4R,5R,6R)-2-methyl-6-[[(2R,3S,4S,5R,6R)-3,4,5-trihydroxy-6-[(2E,4E)-3-methyl-5-[2,6,6-trimethyl-4-[(2R,3R,4S,5S,6R)-3,4,5-trihydroxy-6-(hydroxymethyl)oxan-2-yl]oxycyclohexen-1-yl]penta-2,4-dienoxy]oxan-2-yl]methoxy]oxane-3,4,5-triol	706.341			C33H54O16	NLZPSRMQHKUVNP-XEAMSIHUSA-N	Terpenoids	Apocarotenoids	Megastigmanes	1.34475	4.21924e-07	3.62654e-06	0.420763	-1.24892
E5D6	(2R,3S,4S,5R,6R)-2-(hydroxymethyl)-6-[(3-hydroxy-2,6,6-trimethyl-cyclohexen-1-yl)methoxy]tetrahydropyran-3,4,5-triol	332.184			C16H28O7	XCDBIENWUFNOHL-ZSABPLCXSA-N	Terpenoids	Monoterpenoids	Secoiridoid monoterpenoids	1.2902	0.00051519	0.00136252	1.63279	0.707341
E5E3	5-[[(2R,3S,4S,5R,6R)-6-ethoxy-3,4,5-trihydroxyoxan-2-yl]methoxy]-3-hydroxy-3-methyl-5-oxopentanoic acid	352.137			C14H24O10	XULLFWPDLIAXGP-KSNRQTLNSA-N	Fatty acids	Fatty acyl glycosides	Fatty acyl glycosides of mono- and disaccharides	1.32431	1.28717e-06	8.95527e-06	0.780741	-0.357083
E5F2	Vaginatin	334.214			C20H30O4	IVSKJBHOJBAMEK-ITIKCPBBSA-N	Terpenoids	Sesquiterpenoids	Daucane sesquiterpenoids	1.21031	0.00030661	0.00089263	1.68301	0.751041
E5M2	1-O-[[(2R,3S,4S,5R,6R)-6-ethoxy-3,4,5-trihydroxyoxan-2-yl]methyl] 4-O-methyl 2-hydroxybutanedioate	338.121			C13H22O10	QQNSWUUBBDRRGR-RUEUBNKWSA-N				1.06044	0.00519043	0.0102671	0.632715	-0.660373
E5O6	5-[(E)-but-1-enyl]-4-methoxy-6-[2-(4-methoxy-2-methyl-6-oxo-pyran-3-yl)pentyl]pyran-2-one	388.189			C22H28O6	QAOMGVDFBNZRMP-CSKARUKUSA-N	Polyketides	Cyclic polyketides	2-pyrone derivatives	1.31159	1.39976e-06	9.35767e-06	1.84235	0.881549
E5R7	[1-carboxy-3-[2-hydroxy-3-[(9Z,12Z)-octadeca-9,12-dienoyl]oxy-propoxy]propyl]-trimethyl-ammonium	498.379			C28H52NO6+	MBBOPONQLZPJRT-UTJQPWESSA-O				1.33609	4.80711e-05	0.000180934	0.703335	-0.507717
E5Y1	methyl (2E,6E)-8-[2-hydroxy-1-(2-methoxy-2-oxoethyl)-5-oxocyclohexyl]-2,6-dimethylocta-2,6-dienoate	366.204			C20H30O6	JRCFLZQSHKOCLZ-SADFVUDUSA-N	Terpenoids			1.09089	0.00276351	0.00581706	1.48066	0.566242
E5Y9	7-hydroxy-5-(2-hydroxypentyl)-2,2-dimethyl-4,11-dioxabicyclo[6.2.1]undecan-3-one	300.194			C16H28O5	FDVLITONPQSTKU-UHFFFAOYSA-N	Polyketides	Macrolides	Macrolide lactones	1.13886	0.0067709	0.0128647	0.504174	-0.988007
E6B0	AKOS040738310	455.159			C25H21N5O4	RTCAZLZSGMOEKY-UHFFFAOYSA-N	Alkaloids	Anthranilic acid alkaloids	Quinazoline alkaloids	1.06113	0.00360428	0.0073511	0.479018	-1.06185
E6F4	(3Z)-octadeca-3,17-dien-12,14-diyne-1,2,16-triol	290.188			C18H26O3	JYZNDRLOXGBIHQ-SQFISAMPSA-N				1.37671	5.13531e-13	3.7077e-10	2.38009	1.25101
E6K8	5-hydroxy-2-[3-methoxy-4-[(2S,3R,4S,5S,6R)-3,4,5-trihydroxy-6-[[(2R,3R,4R,5R,6S)-3,4,5-trihydroxy-6-methyloxan-2-yl]oxymethyl]oxan-2-yl]oxyphenyl]-7-[(2S,3R,4S,5S,6R)-3,4,5-trihydroxy-6-(hydroxymethyl)oxan-2-yl]oxy-2,3-dihydrochromen-4-one	772.243			C34H44O20	KDGXKEAZNXFEMZ-HMBACBDWSA-N	Shikimates and Phenylpropanoids	Flavonoids	Flavanones	1.25345	9.32775e-05	0.000317671	1.68653	0.754055
E6L1	(2R,3S,4S,5R,6S)-2-(hydroxymethyl)-6-(3-methoxy-4-prop-2-enylphenoxy)oxane-3,4,5-triol	326.137			C16H22O7	BCCRIKZFPLCLBX-IBEHDNSVSA-N	Shikimates and Phenylpropanoids	Phenylpropanoids	Cinnamic acids and derivatives	1.25538	1.21748e-05	5.63475e-05	0.642737	-0.6377
E6U3	coumaroyl(3-OMe)(-3)Glc(a1-2b)L-Fruf	518.164			C22H30O14	AVZDWQPNGQYBPS-OVONMYPQSA-N	Shikimates and Phenylpropanoids			1.23053	0.000133885	0.000433477	0.696781	-0.521223
E6U4	(2S,3S,4S,5R,6R)-3,4,5-trihydroxy-6-[2-hydroxy-3-(4-hydroxy-3,5-dimethoxybenzoyl)oxypropoxy]oxane-2-carboxylic acid	448.122			C18H24O13	OMBXYSFHJGIADZ-BXNDXMEMSA-N	Shikimates and Phenylpropanoids	Phenolic acids	Shikimic acids and derivatives	1.11257	0.00130168	0.00300038	0.677135	-0.562485
E6W9	Methyl isoapetalate	402.204	34336-10-2		C23H30O6	JDIQSGWDOULBFU-ZFXTZCCVSA-N	Polyketides			1.35223	1.79059e-08	3.23201e-07	2.61233	1.38533
E6X3	(E)-N-[2-(4-Hydroxy-3-methoxyphenyl)ethyl]-3-[4-methoxy-3-[(2S,3R,4R,5S,6R)-3,4,5-trihydroxy-6-(hydroxymethyl)oxan-2-yl]oxyphenyl]prop-2-enamide	505.195	1408298-11-2		C25H31NO10	FYYYSHMTVVJBKO-PMTAATDPSA-N	Shikimates and Phenylpropanoids	Phenylpropanoids	Cinnamic acid amides	1.34783	5.24357e-08	7.14313e-07	2.02018	1.01448
E7B2	(4aR)-6-hydroxy-1,1-dimethyl-9-oxo-7-propan-2-yl-3,4,10,10a-tetrahydro-2H-phenanthrene-4a-carboxylic acid	330.183			C20H26O4	XYZWRQXZTNPKPD-OZBJMMHXSA-N	Terpenoids	Diterpenoids	Tetracyclic diterpenoids	1.11893	0.00670957	0.0127818	1.24583	0.317102
E7I3	4-Hydroxy-3-methyl-6-(2-methyl-1,2,4a,5,6,7,8,8a-octahydronaphthalen-1-yl)pyran-2-one	274.157			C17H22O3	BNZVTXLUECVXIJ-UHFFFAOYSA-N	Polyketides	Cyclic polyketides	Decalins with 2-pyrones	1.2032	0.0002784	0.000820429	1.44882	0.53488
E7K2	2-(6-hydroxy-2-methyl-1,2,4a,5,6,7,8,8a-octahydronaphthalen-1-yl)pyran-4-one	260.141			C16H20O3	OMKPGQVPRXTRDX-UHFFFAOYSA-N	Polyketides	Cyclic polyketides	Decalins with 2-pyrones	1.1829	0.000395038	0.00109505	0.669411	-0.579035
E7M4	6,9a,11a-Trimethyl-4-oxo-1,2,3a,3b,5,5a,7,8,9,9b,10,11-dodecahydronaphtho[1,2-g][1]benzofuran-6-carboxylic acid	334.214			C20H30O4	KKUZEALMRZIWAJ-UHFFFAOYSA-N	Terpenoids	Diterpenoids	Podocarpane diterpenoids	1.1252	0.00160875	0.00355204	1.37674	0.461256

## Sheet: Table S4
Table S4 Transcriptome raw sequencing data filtering statistics Overall statistics
Sample	Clean Reads No.	Reads No. (bp)	Q30 (%)	GC (%)
T1A	38967880	4.07039e+07	94.03	43.73
T2A	3.91044e+07	4.02739e+07	94.62	43.09
T2RH	4.37409e+07	44431276	96.51	42.01
T2RO	4.74058e+07	48120703	96.6	42.49
T3A	4.67315e+07	4.74432e+07	96.41	42.67
MEAN	-	-	95.63	42.8

## Sheet: Table S5
Table S5 Statistics of transcriptome annotation results
Database	Unigenes Number	Percentage（%）
NR	61975	49.52
GO	34848	27.84
KEGG	25579	20.44
Pfam	27657	22.1
eggNOG	57232	45.73
Swissprot	44015	35.17
In all database	9364	7.48
Total	67481	53.92

## Sheet: Table S6
Table S6 Different trend gene enrichment
Term	Database	ID	Input number	Background number	P-Value	Corrected P-Value	Input
Metabolic pathways	KEGG PATHWAY	ath01100	7	2246	0.000174492	0.0176237	NOL|FAB1D|APY2|PPT1|PTEN1|TPS1|APT5
Phosphatidylinositol signaling system	KEGG PATHWAY	ath04070	2	76	0.000933462	0.027956	FAB1D|PTEN1
Inositol phosphate metabolism	KEGG PATHWAY	ath00562	2	78	0.000981585	0.027956	FAB1D|PTEN1
Purine metabolism	KEGG PATHWAY	ath00230	2	100	0.00158793	0.0320761	APT5|APY2
Ubiquinone and other terpenoid-quinone biosynthesis	KEGG PATHWAY	ath00130	1	38	0.0224	0.0443607	PPT1
Porphyrin and chlorophyll metabolism	KEGG PATHWAY	ath00860	1	53	0.0308881	0.0511426	NOL
Pyrimidine metabolism	KEGG PATHWAY	ath00240	1	57	0.0331398	0.0531289	APY2
Phagosome	KEGG PATHWAY	ath04145	1	82	0.0471009	0.0731875	FAB1D
Starch and sucrose metabolism	KEGG PATHWAY	ath00500	1	165	0.0920948	0.123093	TPS1
Spliceosome	KEGG PATHWAY	ath03040	1	192	0.106292	0.135893	DOT2
Biosynthesis of secondary metabolites	KEGG PATHWAY	ath01110	2	1107	0.134287	0.165402	NOL|PPT1

## Sheet: Table S7
Table S7 Statistics of differential gene families
Family	Count
bHLH	1098
MYB_related	920
NAC	822
ERF	731
C2H2	556
WRKY	497
bZIP	495
C3H	478
MYB	473
FAR1	448
B3	437
GATA	386
G2-like	369
M-type_MADS	342
GRAS	337
Trihelix	308
LBD	295
HD-ZIP	241
TCP	219
ARF	200
MIKC_MADS	173
HSF	157
HB-other	144
NF-YC	117
NF-YB	116
GeBP	105
E2F/DP	99
Nin-like	96
TALE	94
BES1	93
Dof	90
CO-like	87
NF-YA	83
AP2	77
CAMTA	73
SBP	70
BBR-BPC	69
ZF-HD	68
WOX	56
CPP	54
ARR-B	53
YABBY	53
GRF	43
DBB	38
LSD	30
SRS	30
NF-X1	27
STAT	25
Whirly	24
VOZ	20
S1Fa-like	19
EIL	17
HRT-like	15
RAV	12
HB-PHD	8
SAP	7
LFY	1
NZZ/SPL	1

## Sheet: Table S8
Table S8 Differential genes of core basal metabolic pathways correlated with differential metabolites
ID	BALDH(TRINITY_DN10860_c1_g1)	ALDH3F1(TRINITY_DN1422_c1_g2)	HISN7(TRINITY_DN46003_c0_g1)	CLAH10(TRINITY_DN56252_c0_g1)	BALDH(TRINITY_DN58286_c0_g1)	ABCB26(TRINITY_DN15999_c0_g1)	ABCB9(TRINITY_DN18049_c0_g1)	ABCB21(TRINITY_DN4512_c0_g1)	ABCB11(TRINITY_DN51684_c0_g1)	ABCB11(TRINITY_DN8334_c0_g1)	ABCB19(TRINITY_DN8888_c0_g1)	C00135	C00137	C00255
BALDH(TRINITY_DN10860_c1_g1)	1	-1	-1	-0.4	-0.737865	0.8	0.4	-0.4	0.8	0.2	-0.8	0.2	-0.4	0.4
ALDH3F1(TRINITY_DN1422_c1_g2)	-1	1	1	0.4	0.737865	-0.8	-0.4	0.4	-0.8	-0.2	0.8	-0.2	0.4	-0.4
HISN7(TRINITY_DN46003_c0_g1)	-1	1	1	0.4	0.737865	-0.8	-0.4	0.4	-0.8	-0.2	0.8	-0.2	0.4	-0.4
CLAH10(TRINITY_DN56252_c0_g1)	-0.4	0.4	0.4	1	-0.316228	0.2	-0.6	0.6	-0.8	-0.8	0.2	-0.8	-0.4	-0.4
BALDH(TRINITY_DN58286_c0_g1)	-0.737865	0.737865	0.737865	-0.316228	1	-0.948683	0.105409	-0.105409	-0.210819	0.316228	0.737865	0.316228	0.632456	-0.210819
ABCB26(TRINITY_DN15999_c0_g1)	0.8	-0.8	-0.8	0.2	-0.948683	1	0.2	-0.2	0.4	-0.4	-0.6	-0.4	-0.8	0
ABCB9(TRINITY_DN18049_c0_g1)	0.4	-0.4	-0.4	-0.6	0.105409	0.2	1	-1	0.8	0	0.2	0	-0.4	-0.4
ABCB21(TRINITY_DN4512_c0_g1)	-0.4	0.4	0.4	0.6	-0.105409	-0.2	-1	1	-0.8	0	-0.2	0	0.4	0.4
ABCB11(TRINITY_DN51684_c0_g1)	0.8	-0.8	-0.8	-0.8	-0.210819	0.4	0.8	-0.8	1	0.4	-0.4	0.4	-0.2	0.2
ABCB11(TRINITY_DN8334_c0_g1)	0.2	-0.2	-0.2	-0.8	0.316228	-0.4	0	0	0.4	1	-0.4	1	0.8	0.8
ABCB19(TRINITY_DN8888_c0_g1)	-0.8	0.8	0.8	0.2	0.737865	-0.6	0.2	-0.2	-0.4	-0.4	1	-0.4	0	-0.8
C00135	0.2	-0.2	-0.2	-0.8	0.316228	-0.4	0	0	0.4	1	-0.4	1	0.8	0.8
C00137	-0.4	0.4	0.4	-0.4	0.632456	-0.8	-0.4	0.4	-0.2	0.8	0	0.8	1	0.6
C00255	0.4	-0.4	-0.4	-0.4	-0.210819	0	-0.4	0.4	0.2	0.8	-0.8	0.8	0.6	1

## Sheet: Table S9
Table S9 Differential genes and differential metabolites of plant secondary metabolic pathways are correlated
ID	CSE (TRINITY_DN11636_c0_g1)	poxN1 (TRINITY_DN2214_c0_g1)	poxN1 (TRINITY_DN2214_c0_g2)	At4g26220 (TRINITY_DN26959_c0_g1)	4CL2 (TRINITY_DN2944_c0_g2)	AIMT1 (TRINITY_DN3679_c1_g1)	PAL1 (TRINITY_DN5639_c0_g1)	CYP73A13 (TRINITY_DN787_c0_g2)	C02666	C01494	CHS1 (TRINITY_DN16067_c0_g1)	At4g26220 (TRINITY_DN26959_c0_g1).1	HCT (TRINITY_DN3611_c0_g2)	CYP73A13 (TRINITY_DN787_c0_g2).1	C10028	C00389
CSE (TRINITY_DN11636_c0_g1)	1	0.8	0.8	0.210819	1	0.4	0.8	0.2	-0.8	-0.6	0.4	0.210819	1	0.2	0.8	0.6
poxN1 (TRINITY_DN2214_c0_g1)	0.8	1	1	0.737865	0.8	0.8	1	0.4	-0.4	0	0.8	0.737865	0.8	0.4	0.4	0
poxN1 (TRINITY_DN2214_c0_g2)	0.8	1	1	0.737865	0.8	0.8	1	0.4	-0.4	0	0.8	0.737865	0.8	0.4	0.4	0
At4g26220 (TRINITY_DN26959_c0_g1)	0.210819	0.737865	0.737865	1	0.210819	0.948683	0.737865	0.210819	0.316228	0.632456	0.737865	1	0.210819	0.210819	-0.105409	-0.632456
4CL2 (TRINITY_DN2944_c0_g2)	1	0.8	0.8	0.210819	1	0.4	0.8	0.2	-0.8	-0.6	0.4	0.210819	1	0.2	0.8	0.6
AIMT1 (TRINITY_DN3679_c1_g1)	0.4	0.8	0.8	0.948683	0.4	1	0.8	0	0.2	0.4	0.6	0.948683	0.4	0	0.2	-0.4
PAL1 (TRINITY_DN5639_c0_g1)	0.8	1	1	0.737865	0.8	0.8	1	0.4	-0.4	0	0.8	0.737865	0.8	0.4	0.4	0
CYP73A13 (TRINITY_DN787_c0_g2)	0.2	0.4	0.4	0.210819	0.2	0	0.4	1	-0.4	0.2	0.8	0.210819	0.2	1	-0.4	-0.2
C02666	-0.8	-0.4	-0.4	0.316228	-0.8	0.2	-0.4	-0.4	1	0.8	-0.2	0.316228	-0.8	-0.4	-0.6	-0.8
C01494	-0.6	0	0	0.632456	-0.6	0.4	0	0.2	0.8	1	0.4	0.632456	-0.6	0.2	-0.8	-1
CHS1 (TRINITY_DN16067_c0_g1)	0.4	0.8	0.8	0.737865	0.4	0.6	0.8	0.8	-0.2	0.4	1	0.737865	0.4	0.8	-0.2	-0.4
At4g26220 (TRINITY_DN26959_c0_g1).1	0.210819	0.737865	0.737865	1	0.210819	0.948683	0.737865	0.210819	0.316228	0.632456	0.737865	1	0.210819	0.210819	-0.105409	-0.632456
HCT (TRINITY_DN3611_c0_g2)	1	0.8	0.8	0.210819	1	0.4	0.8	0.2	-0.8	-0.6	0.4	0.210819	1	0.2	0.8	0.6
CYP73A13 (TRINITY_DN787_c0_g2).1	0.2	0.4	0.4	0.210819	0.2	0	0.4	1	-0.4	0.2	0.8	0.210819	0.2	1	-0.4	-0.2
C10028	0.8	0.4	0.4	-0.105409	0.8	0.2	0.4	-0.4	-0.6	-0.8	-0.2	-0.105409	0.8	-0.4	1	0.8
C00389	0.6	0	0	-0.632456	0.6	-0.4	0	-0.2	-0.8	-1	-0.4	-0.632456	0.6	-0.2	0.8	1
